# Supplementary material for: Can executives’ digital background develop the level of AI utilization in enterprises
Source: PeerJ journal article supplement (doi:10.7717/peerj-cs.2848), 2025-04-29
Supplement: Data.xlsx [file Data.xlsx]

## Sheet: Sheet1
id	year	IND	IT	IT_Dummy	AI	AI_dummy	DTA	TFP_LP	Size	BM	ROA	Mshare	GrossProfit	TOP3a	Quick	Mfee2	FIXED	AuditFee	SOE	HighTech_1	West	Mid	East	Technology_i	Asset_i	Labor_i
2	2019	K	0	0	0	0	0.693147	11.3793	28.1791	0.955774	0.0338386	0.1065	0.362451	0.469738	0.425873	0.0002995	0.00716783	16.4546	1	0	0	0	1	0	0	1
6	2012	K	0	0	1.09861	1	0	10.1996	22.9579	0.771279	0.0712766	1.3798	0.441615	0.333772	0.433734	0.000202522	0.000576978	13.2177	1	0	0	0	1	0	0	1
6	2013	K	0	0	0.693147	0	0	10.6018	23.0227	0.802897	0.0722891	1.0961	0.332134	0.370741	0.711744	0.000156416	0.000541425	13.5924	1	0	0	0	1	0	0	1
6	2014	K	0	0	0	0	0	9.9806	23.1874	0.690853	0.0471843	0.8403	0.365552	0.386613	0.492266	0.000274456	0.000356184	13.5924	1	0	0	0	1	0	0	1
6	2015	K	0	0	0	0	0	10.4861	23.2651	0.536755	0.0358826	0.4784	0.346431	0.375088	0.484841	0.000176868	0.000265633	13.5924	1	0	0	0	1	0	0	1
6	2016	K	0	0	0	0	0.693147	10.3011	23.3012	0.634134	0.0621381	0.3991	0.291261	0.375088	0.742604	0.000204855	0.000215733	13.5924	1	0	0	0	1	0	0	1
6	2018	K	0	0	0	0	0	9.90669	23.3287	0.957162	0.0692086	0	0.387866	0.394237	0.733976	0.000530739	0.000493305	13.5924	1	0	0	0	1	0	0	1
6	2019	K	0	0	0	0	0	10.1044	23.4798	0.995847	0.0575824	0	0.452121	0.395088	0.876418	0.000371345	0.000834811	13.5924	1	0	0	0	1	0	0	1
6	2020	K	0	0	0	0	0	9.51102	23.4599	1.01744	0.0579145	0	0.46592	0.405006	0.955156	0.000436241	0.00285596	13.5924	1	0	0	0	1	0	0	1
6	2021	K	0	0	0	0	0	9.57119	23.8846	1.10092	0.0283581	0	0.434295	0.382473	0.373655	0.000462838	0.00179988	13.5924	1	0	0	0	1	0	0	1
6	2022		0	0	0	0	0	9.67585	23.9966	0.998657	0.0179217	0	0.38632	0.381809	0.493474	0.000410008	0.00205072	13.6412	1	0	0	0	1	0	0	1
8	2012	H	0	0	0	0	0	6.56176	20.2352	0.537635	0.113242	0	0.49088	0.655928	2.05401	0.00258063	0.594686	12.7939	0	0	0	0	1	0	0	0
8	2013	H	0	0	0	0	0	6.5045	20.2559	0.373229	0.0366929	0	0.451981	0.655928	3.15841	0.00276017	0.536794	12.7939	0	0	0	0	1	0	0	0
8	2015	C37	0	0	0	0	0.693147	7.83058	22.0012	0.346336	0.0890885	12.7967	0.474828	0.412354	2.12832	0.00236315	0.119261	13.7101	0	1	0	0	1	1	0	0
8	2016	C37	0	0	0.693147	0	0.693147	8.4819	22.8265	0.434793	0.0900596	8.9433	0.527716	0.242991	1.94858	0.00207211	0.0223164	13.9108	1	1	0	0	1	1	0	0
8	2017	C37	0	0	1.38629	1	2.19722	8.58825	23.0915	0.461561	0.0942834	8.224	0.488964	0.242737	1.68609	0.00199996	0.0229524	13.8155	1	1	0	0	1	1	0	0
8	2018	C37	0	0	2.70805	1	2.19722	8.60874	23.0714	0.764284	0.0323381	7.3135	0.489184	0.396461	1.78246	0.00140752	0.0294123	14.1871	1	1	0	0	1	1	0	0
8	2019	C37	0	0	2.07944	1	1.38629	8.73093	23.2119	0.835044	0.0406396	5.5356	0.486367	0.410182	1.40476	0.00136936	0.0368488	14.1871	1	1	0	0	1	1	0	0
8	2020	C37	0	0	1.09861	1	1.38629	8.21793	23.2749	0.97136	-0.0717224	4.1319	0.379026	0.423375	1.11098	0.00184954	0.0351186	13.9978	1	1	0	0	1	1	0	0
8	2021	C37	0	0	1.38629	1	1.38629	8.39468	23.2393	0.818197	-0.109394	4.1381	0.334711	0.423375	0.901543	0.00142892	0.0333342	14.3461	1	1	0	0	1	1	0	0
8	2022	C37	0	0	1.09861	1	1.38629	8.15209	23.1435	0.85835	-0.071718	4.1381	0.35379	0.423375	0.679782	0.00191179	0.0387388	14.3461	1	1	0	0	1	1	0	0
9	2012	S	0	0	0	0	0	8.58967	23.3013	0.730691	0.0246265	0.0151	0.354128	0.214526	0.612086	0.00122069	0.0889448	14.221	0	0	0	0	1	0	0	1
9	2013	S	0	0	0	0	0.693147	8.50609	23.3342	0.669132	0.0331665	0.0151	0.357836	0.226495	0.517528	0.00124445	0.116107	14.221	0	0	0	0	1	0	0	1
9	2014	S	0	0	0	0	1.38629	8.52832	23.4128	0.514714	0.0333517	0.0151	0.321071	0.203563	0.651745	0.0010311	0.112365	14.221	0	0	0	0	1	0	0	1
9	2015	S	0	0	0	0	1.60944	8.54959	23.6199	0.46762	0.0588255	0.0842	0.334472	0.184753	0.767047	0.00107344	0.12435	14.2855	0	0	0	0	1	0	0	1
9	2016	S	0	0	1.09861	1	1.09861	8.73506	23.797	0.608019	0.021113	0.1022	0.306634	0.183492	0.632769	0.00116168	0.138208	14.2855	0	0	0	0	1	0	0	1
9	2017	S	0	0	1.38629	1	0.693147	8.74061	24.0231	0.830901	0.0132662	0.1232	0.337151	0.183492	0.826643	0.00131152	0.137033	14.2855	0	0	0	0	1	0	0	1
9	2018	S	0	0	1.38629	1	0.693147	9.19408	24.1194	1.04081	0.0233525	0.1232	0.369968	0.222816	0.822524	0.000626379	0.140172	14.5087	0	0	0	0	1	0	0	1
9	2019	S	0	0	1.60944	1	0.693147	9.1855	24.1314	0.853494	0.023705	0.1232	0.351089	0.224374	0.856968	0.000606866	0.154364	14.5087	1	0	0	0	1	0	0	1
9	2020	S	0	0	1.38629	1	0.693147	9.06825	24.1845	0.83908	0.0344079	0.1473	0.341093	0.204988	1.09341	0.000763226	0.144388	14.5087		0	0	0	1	0	0	1
9	2021	S	0	0	1.38629	1	1.38629	9.54548	24.3362	0.634813	0.0510411	0.1473	0.287401	0.248786	0.890547	0.000626811	0.132939	14.5087		0	0	0	1	0	0	1
9	2022		0	0	1.09861	1	1.38629	9.99064	24.6801	0.810742	0.0552335	0.1473	0.199409	0.361489	0.942132	0.000419575	0.150556	14.5087		0	0	0	1	0	0	1
10	2012	C35	0	0	0	0	0.693147	6.81784	19.2952	0.163835	0.0150339	0	0.342844	0.470723	0.787517	0.0019819	0.149445	12.4292	0	1	0	0	1	1	0	0
10	2013	C35	0	0	0	0	0.693147	7.37801	20.7507	0.366609	0.0060127	0	0.306564	0.490961	1.84746	0.00162958	0.0424896	13.2177	0	1	0	0	1	1	0	0
10	2014	C35	0	0	0	0	0.693147	6.97041	20.5054	0.257874	-0.0822249	0	0.177945	0.467961	2.82808	0.00268292	0.0598226	13.4588	0	1	0	0	1	1	0	0
10	2015	E	0	0	0	0	0.693147	8.29124	22.3646	0.629349	0.00669553	0	0.209135	0.323274	0.89071	0.000855451	0.0110846	14.221	0	0	0	0	1	0	0	1
10	2016	E	0	0	0	0	0	8.32597	22.3029	0.704309	0.00777503	0.2294	0.275515	0.294484	0.566797	0.00111453	0.0143739	14.152	0	0	0	0	1	0	0	1
10	2017	E	0	0	0	0	0	8.03223	21.8563	0.598985	-0.263872	0.2294	0.0506734	0.288028	0.509508	0.00165885	0.0202226	14.152	0	0	0	0	1	0	0	1
10	2018	E	0	0	0	0	0	7.19903	21.9091	0.711696	-0.227803	0	0.132006	0.235068	0.531122	0.00409982	0.0217	14.152	0	0	0	0	1	0	0	1
10	2019	E	0	0	0	0	0	9.08965	22.1799	0.768153	0.0333453	0	0.237454	0.247692	0.580411	0.000549804	0.0102739	14.152	0	0	0	0	1	0	0	1
10	2020	E	0	0	0	0	0	9.00595	21.9879	0.699459	0.0194946	0	0.194082	0.247692	0.972139	0.000648752	0.00644425	14.0779	0	0	0	0	1	0	0	1
10	2021	E	0	0	0	0	0		22.2466	0.763391	0.00965581	0	0.178606	0.247692	0.983494	0.000429557	0.0040145	13.9108	0	0	0	0	1	0	0	1
10	2022		0	0	0	0	0		22.0105	0.704982	-0.167251	0	0.114697	0.417411	0.996781	0.00123923	0.00382294	13.9108	0	0	0	0	1	0	0	1
11	2012	K	0	0	0	0	0	8.67744	22.0972	0.831157	0.100619	0	0.547664	0.64244	0.390319	0.000589269	0.0199512	13.1616	1	0	0	0	1	0	0	1
11	2013	K	0	0	0	0	0	8.53797	22.0774	0.797321	0.0769024	0	0.539998	0.6414	0.575013	0.000677252	0.0194413	13.1616	1	0	0	0	1	0	0	1
11	2014	K	0	0	0	0	0	8.33857	22.0799	0.755345	0.107651	0	0.589669	0.641145	0.581171	0.000819235	0.0164987	13.1616	1	0	0	0	1	0	0	1
11	2015	K	0	0	0	0	1.09861	8.10307	22.2003	0.669504	0.0379569	0	0.398031	0.641145	0.59963	0.000955693	0.0196197	13.1616	1	0	0	0	1	0	0	1
11	2016	K	0	0	0	0	0	8.79583	22.6185	0.703487	0.06432	0	0.576276	0.644754	0.741017	0.000483335	0.0111103	13.1616	1	0	0	0	1	0	0	1
11	2017	K	0	0	0	0	0	9.33914	22.4084	0.704853	0.103416	0	0.439573	0.644754	1.09889	0.00047175	0.00544133	13.3375	1	0	0	0	1	0	0	1
11	2018	K	0	0	0.693147	0	0	9.26109	22.4846	0.915818	0.105705	0	0.528139	0.643512	1.45584	0.000369011	0.00560334	13.3535	1	0	0	0	1	0	0	1
11	2019	K	0	0	1.09861	1	0	9.27039	23.1003	0.842691	0.0894526	0	0.638128	0.643536	0.873894	0.000516587	0.00868488	13.653	1	0	0	0	1	0	0	1
11	2020	K	0	0	1.09861	1	0	9.23934	23.2253	0.805802	0.0636504	0	0.662138	0.622716	1.11747	0.000581392	0.00952163	13.6412	1	0	0	0	1	0	0	1
11	2021	K	0	0	0	0	0	9.35562	23.403	0.881525	0.0736682	0	0.668099	0.60856	0.536583	0.000587048	0.00741751	13.6412	1	0	0	0	1	0	0	1
11	2022	K	0	0	0	0	0	9.22003	23.4833	0.887525	0.0348455	0	0.466445	0.597242	0.365649	0.000889785	0.00523694	13.7642	1	0	0	0	1	0	0	1
12	2012	C30	0	0	0	0	0	8.46311	23.386	0.678205	0.0249724	0.5853	0.234268	0.100388	0.333689	0.000753335	0.656986	14.988	1	0	0	0	1	0	1	0
12	2013	C30	0	0	0	0	0	8.62602	23.4366	0.716099	0.110232	0.6239	0.288667	0.094924	0.496306	0.000868036	0.529213	14.8451	1	0	0	0	1	0	1	0
12	2014	C30	0	0	0	0	0	8.46664	23.4501	0.700013	0.0562552	0.6463	0.244344	0.092105	0.197189	0.000848565	0.644522	14.8451	1	0	0	0	1	0	1	0
12	2015	C30	0	0	0	0	0.693147	8.50878	23.4742	0.521317	0.0354043	0.5576	0.216138	0.186248	0.380623	0.000905272	0.651438	14.8451	0	0	0	0	1	0	1	0
12	2016	C30	0	0	0	0	1.09861	8.65428	23.5651	0.61301	0.0490322	0	0.268759	0.2224	0.311648	0.000854225	0.668227	14.8451	0	0	0	0	1	0	1	0
12	2017	C30	0	0	0	0	1.09861	8.8393	23.6955	0.713248	0.0451797	0.4243	0.244778	0.21367	0.569981	0.000845019	0.590774	14.9141	0	0	0	0	1	0	1	0
12	2018	C30	0	0	0	0	1.38629	8.87009	23.6737	0.995812	0.0244356	0.6029	0.234636	0.213184	0.698595	0.000689178	0.519552	14.9141	0	0	0	0	1	0	1	0
12	2019	C30	0	0	0	0	1.60944	8.86488	23.6248	0.878067	0.0300368	0.3327	0.260589	0.216024	0.614216	0.000575429	0.537493	14.9141	0	0	0	0	1	0	1	0
12	2020	C30	0	0	0	0	1.94591	8.90214	23.6071	0.729036	0.0450033	0.1924	0.302381	0.218663	1.00147	0.000625022	0.511418	14.9141	0	0	0	0	1	0	1	0
12	2021	C30	0	0	0	0	2.19722	9.15262	23.716	0.652884	0.0825571	0.1528	0.350689	0.218663	1.37539	0.000552208	0.429628	14.9141	0	0	0	0	1	0	1	0
12	2022	C30	0	0	0	0	1.94591	9.1634	23.9777	0.904458	0.0891465	0.0887	0.275807	0.211541	1.00639	0.000473026	0.434035	14.8088	0	0	0	0	1	0	1	0
14	2012	K	0	0	0	0	0	7.80382	21.4266	0.652283	0.0173791	0	0.454761	0.357024	0.247303	0.00159916	0.0132673	12.8479	1	0	0	0	1	0	0	1
14	2013	K	0	0	0	0	0	8.05714	21.3613	0.573781	0.0179943	0	0.401169	0.401932	0.367197	0.0012184	0.014854	12.8479	1	0	0	0	1	0	0	1
14	2014	K	0	0	0	0	0	8.02385	21.5283	0.520545	0.0304076	0	0.52943	0.341902	0.371101	0.00152772	0.0100842	12.8479	1	0	0	0	1	0	0	1
14	2015	K	0	0	0	0	0	7.8533	21.4982	0.361845	0.0242377	0.0011	0.425992	0.447188	0.236043	0.0015447	0.00947291	12.8479	1	0	0	0	1	0	0	1
14	2016	K	0	0	0	0	0	8.28426	21.3512	0.355382	0.0143968	0.0011	0.209055	0.471946	0.411903	0.000874778	0.0106344	12.8479	1	0	0	0	1	0	0	1
14	2017	K	0	0	0	0	0	8.12857	21.1474	0.526536	0.00645968	0	0.193196	0.422507	0.379517	0.00111883	0.0117288	12.8479	1	0	0	0	1	0	0	1
14	2018	K	0	0	0	0	1.09861	7.81709	21.3742	0.674889	0.0896943	0	0.29508	0.358624	0.314122	0.00165223	0.00805614	12.8479	1	0	0	0	1	0	0	1
14	2019	K	0	0	0	0	1.09861	8.04028	21.4025	0.681461	0.0165218	0	0.297654	0.360494	0.414255	0.00143477	0.00717518	13.1224	1	0	0	0	1	0	0	1
14	2020	K	0	0	0	0	1.09861	7.63738	21.6127	0.772591	0.00414643	0	0.378775	0.368103	0.418393	0.00158691	0.0104487	13.1224	1	0	0	0	1	0	0	1
14	2021	K	0	0	0.693147	0	1.09861	8.28151	21.655	0.807843	0.0197039	0	0.368881	0.378484	0.299963	0.00101356	0.00970559	13.1224	1	0	0	0	1	0	0	1
14	2022	K	0	0	0.693147	0	0.693147	8.47816	21.8188	0.705718	0.0897168	0	0.407231	0.362477	0.437749	0.000840345	0.00763763	13.1224	1	0	0	0	1	0	0	1
16	2012	C39	0.693147	1	0	0	1.79176	9.82639	23.5304	1.05733	0.00271523	0	0.179943	0.260791	0.78627	0.000357542	0.11398	13.5924	1	1	0	0	1	1	0	0
16	2013	C39	0.693147	1	0	0	1.09861	9.91168	23.4797	1.02466	0.0037048	0	0.167231	0.260855	0.78991	0.00033708	0.121227	13.8155	1	1	0	0	1	1	0	0
16	2014	C39	0.693147	1	0	0	1.38629	9.91144	23.5434	0.94023	0.003722	0	0.138479	0.278086	0.79222	0.00035366	0.106303	13.8155	1	1	0	0	1	1	0	0
16	2015	C39	0	0	0	0	2.94444	9.8617	23.38	0.630277	-0.0822337	0	0.12719	0.317107	0.702668	0.000378214	0.123751	13.9978	1	1	0	0	1	1	0	0
16	2016	C39	0	0	0	0	2.89037	10.0001	23.5707	0.743671	0.00585361	0	0.137	0.316459	0.668192	0.00029931	0.0912816	13.9978	1	1	0	0	1	1	0	0
16	2017	C39	0	0	1.09861	1	2.70805	10.4257	23.8828	0.867665	0.249343	0.0011	0.110119	0.31641	0.94475	0.000249046	0.0673708	14.152	1	1	0	0	1	1	0	0
16	2018	C39	0	0	1.09861	1	3.7612	10.6882	24.2193	1.08916	0.0236496	0.0011	0.0628525	0.316447	0.721283	0.000139158	0.0730702	14.7492	1	1	0	0	1	1	0	0
16	2019	C39	0	0	0.693147	0	3.2581	10.8469	24.4748	1.02822	0.00886402	0.0011	0.0540815	0.316447	0.907813	0.000155396	0.0601418	15.0677	1	1	0	0	1	1	0	0
16	2020	C39	0	0	1.38629	1	3.21888	10.7063	24.6328	0.970442	0.0116819	0.0011	0.0547502	0.317356	0.764196	0.000203167	0.0637306	15.0094	1	1	0	0	1	1	0	0
16	2021	C39	0	0	1.38629	1	3.17805	10.6203	24.409	0.956298	0.0179765	0.0011	0.0347129	0.338404	0.713612	0.000195585	0.100573	14.7318	1	1	0	0	1	1	0	0
16	2022	C39	0	0	1.38629	1	3.3322	10.1192	24.3613	0.996383	-0.0454524	0	0.0276689	0.335866	0.885907	0.000320742	0.108217	14.604	1	1	0	0	1	1	0	0
17	2013	C37	0	0	0	0	0	8.12021	18.8362	0.084307	10.0322	0.0026	0.102858	0.198686	0.983693	0.0031653	0.00150368	13.1224	0	1	0	0	1	1	0	0
17	2014	C37	0	0	0	0	0.693147	7.85946	17.7569	0.018667	0.0569751	0.0015	0.0617998	0.180485	1.05319	0.000665292	0.0150314	13.017	0	1	0	0	1	1	0	0
17	2015	C37	0	0	0	0	0	7.64877	17.6413	0.008184	-0.00217605	0.0011	0.0677862	0.152812	1.13766	0.000315315	0.0219735	13.017	0	1	0	0	1	1	0	0
17	2016	C37	0	0	0	0	0	7.25399	17.8061	0.01084	0.0778648	0.0011	0.110778	0.169412	1.17326	0.000401868	0.068942	13.017	0	1	0	0	1	1	0	0
17	2017	C37	0	0	0	0	0.693147	7.22555	18.1136	0.029523	0.0247424	0.001	0.0979214	0.169412	1.15982	0.000417721	0.0535769	13.017		1	0	0	1	1	0	0
17	2018	C37	0	0	0	0	0.693147	7.12906	18.1093	0.039789	-0.0256195	0.001	0.0987059	0.169269	1.14476	0.000552702	0.0478245	13.017		1	0	0	1	1	0	0
17	2019	C37	0	0	0	0	0.693147	6.68594	17.9544	0.034915	-0.11493	0.001	0.0965661	0.169269	0.980039	0.000843099	0.0668143	13.017		1	0	0	1	1	0	0
17	2020	C37	0	0	0	0	0	7.14905	18.3345	0.092999	0.0566521	0.001	0.124183	0.169269	1.19558	0.000405881	0.0413344	13.017		1	0	0	1	1	0	0
17	2021	C37	0	0	0	0	0	7.50169	18.394	0.067362	-0.0173401	0.001	0.0764893	0.169269	1.14459	0.00037245	0.0353234	13.017		1	0	0	1	1	0	0
17	2022	C37	0	0	0	0	0.693147	8.43096	19.8001	0.209871	-0.0322769	0	0.0626795	0.315233	3.78119	0.000169195	0.00580084	13.017		1	0	0	1	1	0	0
19	2012	C15	0	0	0	0	0	6.82945	20.9246	0.573156	0.0648274	0	0.171564	0.450468	2.55266	0.00204618	0.130842	13.1224	1	0	0	0	1	0	0	1
19	2013	C15	0	0	0	0	0.693147	6.96829	21.0134	0.644168	0.0353287	0	0.161397	0.414717	1.32997	0.00138315	0.230594	13.017	1	0	0	0	1	0	0	1
19	2014	C15	0	0	0	0	1.60944	6.72099	20.867	0.495511	0.0113406	0	0.377762	0.414717	2.8118	0.00205541	0.344238	13.017	1	0	0	0	1	0	0	1
19	2015	C15	0	0	0	0	2.63906	6.66227	20.782	0.224616	-0.0387893	0.0668	0.268404	0.389087	3.04477	0.00238053	0.337984	13.0815	1	0	0	0	1	0	0	1
19	2016	C15	0	0	0	0	2.70805	6.48082	20.8875	0.178274	0.0805229	0.0676	0.251423	0.358118	4.04703	0.00315018	0.282564	13.0815	1	0	0	0	1	0	0	1
19	2018	C15	0	0	0	0	3.2581	9.79878	22.5903	0.823681	0.0851151	0.0257	0.0990027	0.723165	0.995997	0.000229156	0.153524	13.7101	1	0	0	0	1	0	0	1
19	2019	F	0	0	0	0	3.2581	9.83191	22.6365	0.893372	0.0580664	0.0088	0.0998806	0.723194	0.845898	0.000235708	0.139488	13.8055	1	0	0	0	1	0	0	1
19	2020	F	0	0	1.60944	1	3.4012	9.84889	22.7124	0.844736	0.0573358	0	0.0975651	0.726289	0.468349	0.000239878	0.153596	13.4588	1	0	0	0	1	0	0	1
19	2021	F	0	0	0.693147	0	3.17805	9.50235	22.7605	0.870357	0.0582563	0	0.126266	0.726285	0.384385	0.000296596	0.277436	13.4444	1	0	0	0	1	0	0	1
19	2022	F	0	0	0	0	3.21888	9.30549	22.7303	0.848141	0.0553637	0	0.137123	0.727759	0.193204	0.000337504	0.287762	13.5144	1	0	0	0	1	0	0	1
20	2012	C39	0	0	0	0	0	7.56329	20.34	0.576688	0.0048027	0	0.119858	0.518996	1.44446	0.0006295	0.297432	13.0815	0	1	0	0	1	1	0	0
20	2013	C39	0	0	0	0	0	7.43111	20.4104	0.571287	-0.00922496	0	0.112029	0.518996	1.34631	0.000626023	0.267372	13.0815	0	1	0	0	1	1	0	0
20	2015	C39	0	0	0	0	0	7.39522	20.8674	0.162133	-0.00362496	0	0.163087	0.518996	3.28999	0.000854759	0.0957649	13.0815	0	1	0	0	1	1	0	0
20	2016	C39	0	0	0	0	0	7.68345	20.2652	0.126346	0.00610665	0	0.136362	0.514758	0.976315	0.000811759	0.128929	13.0815	0	1	0	0	1	1	0	0
20	2017	C39	0	0	0	0	0	7.99661	20.2609	0.187796	0.00154394	0	0.0933913	0.514758	0.93105	0.000498614	0.13278	13.1224	0	1	0	0	1	1	0	0
20	2018	C39	0	0	0	0	0	7.46181	20.2405	0.236845	0.00528534	0	0.11044	0.515433	0.877904	0.00060459	0.304792	13.1224	0	1	0	0	1	1	0	0
20	2019	C39	0	0	0	0	0	7.57312	20.2358	0.236328	0.00886909	0.9994	0.120649	0.523814	1.19281	0.000527111	0.322764	13.1224	0	1	0	0	1	1	0	0
20	2020	C39	0	0	0	0	0	7.52407	20.2577	0.26565	0.0109992	0.9994	0.113501	0.504771	1.18228	0.000498469	0.308397	13.1224	0	1	0	0	1	1	0	0
20	2021	C39	0	0	0.693147	0	0	7.6341	20.3076	0.296782	0.0111856	0.9994	0.108113	0.504771	0.915936	0.000541852	0.28471	13.1224	0	1	0	0	1	1	0	0
20	2022	C39	0.693147	1	0	0	0	7.63741	20.227	0.286326	0.0159649	0.9994	0.104786	0.504771	1.37891	0.000481289	0.280776	13.1224	0	1	0	0	1	1	0	0
21	2012	C39	1.79176	1	0	0	0	9.85233	23.0438	0.832037	0.000823872	0.146	0.0253631	0.584304	1.12188	0.000186443	0.123528	13.8738	1	1	0	0	1	1	0	0
21	2013	C39	1.38629	1	0	0	1.09861	9.78966	23.3426	0.845183	0.0132905	0.131	0.02358	0.544797	1.19498	0.000236764	0.0892309	14.2855	1	1	0	0	1	1	0	0
21	2014	C39	1.38629	1	0	0	1.09861	9.82262	23.394	0.724345	0.0113963	0.131	0.031881	0.539928	1.16393	0.000203263	0.0968815	14.2945	1	1	0	0	1	1	0	0
21	2015	C39	0.693147	1	0	0	0.693147	9.61813	23.3861	0.533729	0.0125511	0.131	0.0432953	0.539928	1.07303	0.000262156	0.147513	14.4796	1	1	0	0	1	1	0	0
21	2016	C39	1.09861	1	0	0	1.09861	9.48238	23.1843	0.57762	0.0171746	0.1305	0.0567194	0.536351	1.00353	0.000330371	0.216667	14.2628	1	1	0	0	1	1	0	0
21	2017	C39	1.09861	1	0	0	0	9.47897	23.5326	0.664631	0.0405339	0.1683	0.0639778	0.532298	0.919559	0.000358673	0.146887	14.3292	1	1	0	0	1	1	0	0
21	2018	C39	0.693147	1	1.09861	1	1.09861	9.59889	23.4957	0.904564	0.0346893	0.1642	0.0470064	0.52975	0.875781	0.000257474	0.16049	14.123	1	1	0	0	1	1	0	0
21	2019	C39	1.09861	1	0	0	0.693147	9.35521	23.6385	0.630734	0.025652	0.1642	0.0953027	0.520546	0.87451	0.000332007	0.147366	14.123	1	1	0	0	1	1	0	0
21	2020	C39	0.693147	1	0	0	1.79176	9.42868	23.7976	0.520248	0.0475498	0.0493	0.113299	0.470405	1.02821	0.000316537	0.154899	14.2602	1	1	0	0	1	1	0	0
21	2021	C39	0.693147	1	2.07944	1	1.79176	9.45663	24.0209	0.671359	0.0342647	0.0478	0.0964273	0.427596	0.909609	0.000380963	0.15746	14.2602	1	1	0	0	1	1	0	0
21	2022	C39	0.693147	1	1.60944	1	2.30259	9.48195	24.0488	0.854955	0.0251099	0.0439	0.120157	0.425354	0.903657	0.000352975	0.151625	14.1802	1	1	0	0	1	1	0	0
25	2012	F	0	0	0	0	0	7.1596	20.2846	0.395434	0.00159907	0	0.198319	0.667543	0.311207	0.00108272	0.241989	13.2177	1	0	0	0	1	0	0	1
25	2013	F	0	0	0	0	0	7.31942	20.368	0.317263	0.00448466	0	0.203749	0.680669	0.319665	0.000908677	0.213936	13.2177	1	0	0	0	1	0	0	1
25	2014	F	0	0	0	0	1.60944	7.29782	20.508	0.315617	0.0113661	0	0.162507	0.674215	0.285688	0.00093571	0.177161	13.2177	1	0	0	0	1	0	0	1
25	2015	F	0	0	0	0	2.56495	6.887	20.8791	0.072449	0.0432792	0	0.282275	0.753642	1.3083	0.00108261	0.116871	13.2177	1	0	0	0	1	0	0	1
25	2016	F	0	0	0	0	1.38629	6.97332	20.8964	0.102948	0.0234282	0	0.293603	0.743122	1.34173	0.00130911	0.108685	13.2177	1	0	0	0	1	0	0	1
25	2017	F	0	0	0	0	2.48491	7.10962	21.0621	0.168098	0.0507512	0	0.267778	0.733727	1.27824	0.00105793	0.0857233	13.2177	1	0	0	0	1	0	0	1
25	2018	F	0	0	0.693147	0	1.94591	7.29938	21.2291	0.209841	0.056271	0	0.197691	0.713546	1.34508	0.00106777	0.0679457	13.2177	1	0	0	0	1	0	0	1
25	2019	F	0	0	0	0	0	7.63901	21.2215	0.186516	0.132447	0	0.245243	0.673771	2.20773	0.000764671	0.0650875	13.1224	1	0	0	0	1	0	0	1
25	2020	F	0	0	0	0	1.09861	7.31941	21.2588	0.240365	0.0359578	0	0.247769	0.642565	1.99992	0.000942093	0.0697342	13.1224	1	0	0	0	1	0	0	1
25	2021	F	0	0	0	0	0.693147	7.5262	21.3437	0.290207	0.0740187	0	0.305967	0.624028	2.37429	0.000927226	0.058849	13.466	1	0	0	0	1	0	0	1
25	2022		0	0	0	0	0	8.03701	21.5262	0.299433	0.0397488	0	0.16399	0.566752	1.82667	0.000562017	0.0460073	13.466	1	0	0	0	1	0	0	1
26	2012	F	0	0	0	0	0.693147	8.69404	21.9253	0.809089	0.0371745	0.0169	0.344461	0.461484	0.334477	0.000639574	0.0955287	13.3847	1	0	0	0	1	0	0	1
26	2013	F	0	0	0	0	1.09861	8.72807	21.9927	0.745887	0.037797	0.0169	0.358748	0.453723	0.383115	0.000600278	0.0862362	13.3847	1	0	0	0	1	0	0	1
26	2014	F	0	0	0	0	1.09861	8.75854	22.0201	0.639716	0.0404915	0.0169	0.373208	0.436202	0.387516	0.000635885	0.0885052	13.3847	1	0	0	0	1	0	0	1
26	2015	F	0	0	0	0	1.60944	8.68987	22.1694	0.552627	0.0308797	0.0169	0.389818	0.432177	0.728505	0.000626393	0.0852385	13.3847	1	0	0	0	1	0	0	1
26	2016	F	0	0	0	0	2.07944	8.48904	22.1108	0.599884	0.0267525	0.0151	0.407852	0.4114	0.550541	0.000672289	0.152614	13.7642	1	0	0	0	1	0	0	1
26	2017	F	0	0	0.693147	0	2.70805	8.64344	21.9986	0.635928	0.0376064	0.1156	0.406227	0.413822	0.591956	0.000717445	0.146293	13.4588	1	0	0	0	1	0	0	1
26	2018	F	0	0	1.09861	1	1.38629	8.72374	22.0041	0.905765	0.0512112	0.1156	0.413663	0.442331	0.661535	0.00064451	0.118246	13.4588	1	0	0	0	1	0	0	1
26	2019	F	0	0	0	0	1.60944	8.85817	22.0479	0.677552	0.058666	0.2531	0.401436	0.406086	0.775837	0.000649585	0.096784	13.9108	1	0	0	0	1	0	0	1
26	2020	F	0	0	0	0	2.3979	9.00521	22.1142	0.704866	0.0756133	0.2619	0.378045	0.410427	0.845786	0.000604602	0.087773	13.9978	1	0	0	0	1	0	0	1
26	2021	F	0	0	0	0	2.07944	9.21562	22.1368	0.713434	0.0954229	0.3802	0.373413	0.41168	0.782717	0.000498932	0.0850234	13.9978	1	0	0	0	1	0	0	1
26	2022	F	0	0	0	0	2.56495	9.03505	22.1384	0.809837	0.0648251	0.3206	0.370944	0.445822	0.839392	0.000503008	0.0885635	13.9978	1	0	0	0	1	0	0	1
27	2012	D	0	0	0	0	0	9.0966	24.2002	1.05696	0.0355881	0	0.167643	0.73305	0.850812	0.000380903	0.41728	14.4143	1	0	0	0	1	0	1	0
27	2013	D	0	0	0	0	0	9.05115	24.2316	1.04901	0.0528231	0	0.213022	0.731589	0.759179	0.000440676	0.41204	14.4143	1	0	0	0	1	0	1	0
27	2014	D	0	0	0	0	0	9.03929	24.3724	0.92062	0.0650409	0	0.259866	0.733547	0.780677	0.000401856	0.379115	14.4143	1	0	0	0	1	0	1	0
27	2015	D	0	0	0	0	0.693147	8.82885	24.7849	0.91948	0.0426426	0	0.299481	0.748798	0.808726	0.000575798	0.315423	14.4143	1	0	0	0	1	0	1	0
27	2016	D	0	0	0	0	0.693147	8.80344	24.8319	0.961935	0.0236549	0	0.289318	0.748798	0.648413	0.000545014	0.334792	14.2729	1	0	0	0	1	0	1	0
27	2017	D	0	0	0	0	0.693147	8.99485	25.0701	1.00912	0.012239	0	0.274778	0.748869	0.661678	0.000508551	0.393987	14.2729	1	0	0	0	1	0	1	0
27	2018	D	0	0	0	0	1.09861	9.11877	25.1668	1.08507	0.00882767	0	0.266282	0.751248	0.873026	0.000421714	0.407192	14.4935	1	0	0	0	1	0	1	0
27	2019	D	0	0	0	0	0	9.22165	25.2888	1.10288	0.0201907	0	0.310781	0.751248	0.559453	0.000476451	0.371899	14.4935	1	0	0	0	1	0	1	0
27	2020	D	0	0	0	0	0.693147	9.201	25.46	1.12731	0.0406089	0	0.28828	0.737947	0.898397	0.000714457	0.309359	14.4935	1	0	0	0	1	0	1	0
27	2021	D	0	0	0	0	0.693147	9.43362	25.6023	1.09176	0.0171812	0	0.194623	0.727947	0.912406	0.000477356	0.437597	14.4033	1	0	0	0	1	0	1	0
27	2022	D	0	0	0	0	0	9.59292	25.6739	1.20532	0.01813	0	0.173505	0.737531	0.971455	0.00035964	0.419748	14.6076	1	0	0	0	1	0	1	0
28	2012	F	0	0	0	0	0	10.2741	22.9528	0.551967	0.0570326	0.0012	0.0889996	0.436723	0.859593	0.000217765	0.0742792	14.4574	1	0	0	0	1	0	0	1
28	2013	F	0	0	0	0	1.79176	10.4039	23.1264	0.524223	0.0524935	0.0009	0.0831806	0.44129	0.899192	0.000199253	0.0693388	14.5574	1	0	0	0	1	0	0	1
28	2014	F	0	0	0	0	1.38629	10.5265	23.275	0.592038	0.0560845	0.0007	0.081476	0.551512	1.12774	0.000198009	0.0581153	14.5574	1	0	0	0	1	0	0	1
28	2016	F	0	0	0	0	1.60944	11.027	23.7826	0.663588	0.074245	0.0007	0.111524	0.545979	1.12358	0.000208425	0.0228506	14.8871	1	0	0	0	1	0	0	1
28	2017	F	0	0	1.09861	1	1.09861	10.9849	23.8298	0.65268	0.0529929	0.0006	0.1077	0.597861	1.19857	0.000178354	0.0246921	14.9399	1	0	0	0	1	0	0	1
28	2018	F	0	0	0	0	0.693147	10.9901	24.0882	0.928387	0.0525971	0.0006	0.118228	0.604657	1.3624	0.000181655	0.0210137	15.0178	1	0	0	0	1	0	0	1
28	2019	F	0	0	0	0	1.09861	11.1658	24.2354	0.935755	0.0475323	0.001	0.110544	0.638648	1.29734	0.000161784	0.0182753	15.1938	1	0	0	0	1	0	0	1
28	2020	F	0	0	0	0	0.693147	11.169	24.402	0.97043	0.0470845	0.001	0.118319	0.616757	1.13425	0.000169017	0.0215735	15.5982	1	0	0	0	1	0	0	1
28	2021	F	0	0	1.09861	1	0	11.2974	24.4794	1.08317	0.0370885	0.001	0.117302	0.60773	1.08257	0.000152965	0.0203027	15.6424	1	0	0	0	1	0	0	1
28	2022	F	0	0	0	0	2.56495	11.3756	24.4755	1.17035	0.041493	0.001	0.121539	0.610019	1.13528	0.000153735	0.0199483	15.5616	1	0	0	0	1	0	0	1
29	2012	K	0	0	0	0	0	8.19719	22.035	0.604312	0.0307545	0	0.319221	0.642682	0.46593	0.000661216	0.0170236	13.2708	1	0	0	0	1	0	0	1
29	2013	K	0	0	0	0	0	8.93139	22.1619	0.691078	0.0575988	0	0.26899	0.638799	0.36907	0.000301648	0.0144043	13.2708	1	0	0	0	1	0	0	1
29	2014	K	0	0	0	0	0	8.96478	22.1992	0.495678	0.0693949	0	0.338903	0.666983	0.526008	0.000304753	0.012416	13.2708	1	0	0	0	1	0	0	1
29	2015	K	0	0	0	0	0	8.99392	22.1536	0.294936	0.0703841	0.0089	0.357655	0.646112	0.904773	0.000272185	0.0124916	13.2708	1	0	0	0	1	0	0	1
29	2020	K	0	0	0	0	0	8.88879	22.32	0.619479	0.0588961	0.0012	0.501236	0.638319	2.31349	0.000579664	0.00567965	13.1806	1	0	0	0	1	0	0	1
29	2021	K	0	0	0	0	0	8.73966	22.545	0.671524	0.0391387	0.0012	0.495493	0.639937	0.681378	0.00074431	0.00386905	13.1806	1	0	0	0	1	0	0	1
29	2022	K	0	0	0	0	0	8.22737	22.4619	0.402542	0.0251977	0.0009	0.311061	0.63051	0.558012	0.000878942	0.00376561	13.1806	1	0	0	0	1	0	0	1
30	2013		0	0	0	0	0	8.79028	22.6848	0.927246	0.165489	1.1947	0.182956	0.583975	1.18051	0.000892788	0.194332	13.487	1	1	0	1	0	1	0	0
30	2014	C36	0	0	0	0	0	8.74932	22.7072	0.727372	0.0935113	1.2364	0.186391	0.534817	1.38469	0.000994107	0.18929	13.487	1	1	0	1	0	1	0	0
30	2015	C36	0	0	0	0	0	8.51898	22.8133	0.698229	0.0683679	1.2229	0.184	0.537068	1.63272	0.00114784	0.219005	13.487	1	1	0	1	0	1	0	0
30	2016	C36	0	0	0	0	0.693147	8.82874	22.9286	0.64154	0.0788676	0.7062	0.186089	0.537068	1.49117	0.00097512	0.190878	13.487	1	1	0	1	0	1	0	0
30	2017	C36	0	0	0.693147	0	0.693147	9.02749	23.0616	0.719767	0.08426	0.7062	0.185146	0.539144	1.48726	0.000879045	0.17111	13.487	1	1	0	1	0	1	0	0
30	2018	C36	0	0	0.693147	0	0.693147	9.04037	23.1813	1.04043	0.079257	0.4519	0.155321	0.562845	1.38728	0.000687225	0.190678	13.4588	1	1	0	1	0	1	0	0
30	2019	C36	0	0	1.09861	1	1.09861	9.27518	23.2821	0.923178	0.0717999	0.2101	0.139792	0.566711	1.29137	0.000502682	0.181549	13.4588	1	1	0	1	0	1	0	0
30	2020	C36	0	0	1.38629	1	2.70805	9.36088	23.3948	0.750925	0.0663548	0.1189	0.130479	0.566711	1.32555	0.000569144	0.170371	13.4588	1	1	0	1	0	1	0	0
30	2021	C36	0	0	1.94591	1	3.04452	9.4439	23.422	0.759503	0.0530893	0.1189	0.111895	0.566711	1.2474	0.00054686	0.201325	13.4588	1	1	0	1	0	1	0	0
30	2022	C36	0	0	2.07944	1	2.63906	9.42402	23.4484	1.04158	0.0311067	0.0799	0.0841842	0.566711	1.11291	0.000505334	0.192162	13.4588	1	1	0	1	0	1	0	0
31	2012	K	0	0	0	0	0	9.64605	24.274	0.990539	0.0201798	0.0008	0.294827	0.533629	0.348824	0.000381688	0.0125447	14.0466	1	0	0	0	1	0	0	1
31	2013	K	0	0	0	0	0	9.80206	24.4271	1.05843	0.0243683	0.0008	0.302551	0.525839	0.316157	0.00030179	0.0145638	14.0466	1	0	0	0	1	0	0	1
31	2014	K	0	0	0	0	0	9.67595	24.5587	0.908236	0.0207747	0.0008	0.376848	0.524083	0.337731	0.000373504	0.0126822	14.1419	1	0	0	0	1	0	0	1
31	2015	K	0	0	0	0	1.09861	10.0838	24.7364	0.793499	0.0197027	0.0006	0.264471	0.499401	0.438996	0.000266557	0.0102469	13.7317	1	0	0	0	1	0	0	1
31	2016	K	0	0	0	0	0	10.3335	24.8387	0.926083	0.0228726	0	0.342643	0.49845	0.689158	0.000240936	0.0102569	13.914	1	0	0	0	1	0	0	1
31	2018	K	0	0	0	0	1.94591	10.0954	25.236	1.0569	0.0240154	0.0006	0.425069	0.518848	0.836536	0.000434407	0.00601681	14.1047	1	0	0	0	1	0	0	1
31	2019	K	0	0	0.693147	0	1.79176	10.2901	25.9337	1.03756	0.0270115	0.0003	0.412015	0.773168	0.683798	0.000471421	0.0230586	14.3921	1	0	0	0	1	0	0	1
31	2020	K	0	0	0	0	1.94591	10.4225	26.0209	1.06012	0.00586186	0.0003	0.314435	0.758906	0.630916	0.000374609	0.0202519	14.3921	1	0	0	0	1	0	0	1
31	2021	K	0	0	0	0	1.60944	10.5514	26.0833	1.08092	0.00371996	0.0003	0.274365	0.758906	0.537828	0.000371001	0.0174628	14.838	1	0	0	0	1	0	0	1
31	2022	K	0	0	0	0	0	10.498	26.0913	1.15834	-0.0104066	0.0003	0.240589	0.758906	0.598378	0.00038635	0.0164145	14.8733	1	0	0	0	1	0	0	1
32	2012	C39	0	0	0.693147	0	2.07944	8.47872	21.2492	0.722059	0.109596	0.0217	0.131338	0.474983	1.04534	0.000883439	0.0611151	13.1806	1	1	0	0	1	1	0	0
32	2013	C39	0	0	1.60944	1	1.79176	8.68092	21.1297	0.599329	0.00940108	0.0185	0.154263	0.478894	1.37117	0.000732902	0.0440467	13.5924	1	1	0	0	1	1	0	0
32	2014	C39	0	0	1.79176	1	1.79176	9.16346	21.741	0.72126	0.0449214	0.0007	0.11318	0.472035	1.4267	0.000550831	0.0417097	13.6412	1	1	0	0	1	1	0	0
32	2015	F	0	0	1.79176	1	1.60944	8.76319	21.4774	0.299875	0.0202186	0.0004	0.144151	0.609462	2.04304	0.000850969	0.0418708	13.6412	1	0	0	0	1	0	0	1
32	2016	F	0	0	1.79176	1	1.38629	8.73207	21.3939	0.383063	0.0224235	0.3637	0.139666	0.609462	2.87259	0.000825427	0.0530868	13.3847	1	0	0	0	1	0	0	1
32	2017	F	0	0	2.30259	1	1.38629	8.66404	21.3794	0.52086	0.00673075	0.3633	0.181163	0.609462	3.79104	0.0008272	0.0437886	13.3847	1	0	0	0	1	0	0	1
32	2018	F	0	0	2.30259	1	2.63906	8.72837	21.4903	0.69694	0.0547802	0.3712	0.221546	0.610667	2.16237	0.000795861	0.0357387	13.3375	1	0	0	0	1	0	0	1
32	2019	F	0	0	1.38629	1	2.48491	8.63578	21.5744	0.358582	0.0701936	0.2784	0.245368	0.610667	2.06931	0.000716035	0.0369842	13.3047	1	0	0	0	1	0	0	1
32	2020	F	0	0	1.38629	1	2.77259	8.65444	21.6733	0.317251	0.0766946	0.3259	0.246035	0.610667	2.27697	0.000606749	0.0317094	13.3047	1	0	0	0	1	0	0	1
32	2021	E	0	0	1.94591	1	2.56495	10.4389	24.5104	0.896375	0.0474326	4.3685	0.119241	0.424814	1.13994	0.000293928	0.0958375	14.6484	1	0	0	0	1	0	0	1
32	2022	E	0	0	2.19722	1	2.3979	10.5901	24.6905	0.879281	0.014717	4.2704	0.114082	0.425108	1.17203	0.000356463	0.0829861	14.5333	1	0	0	0	1	0	0	1
34	2012	S	0	0	0	0	0	7.39938	19.0811	0.129366	0.0200153	0.0012	0.132307	0.347379	0.665046	0.000671374	0.372728	13.2177	0	0	0	0	1	0	0	1
34	2013	S	0	0	0	0	1.09861	7.63287	19.751	0.221292	0.0586498	0.0012	0.119255	0.347379	0.833358	0.000605677	0.14502	13.2177	0	0	0	0	1	0	0	1
34	2014	S	0	0	0	0	1.09861	7.56782	19.9504	0.175515	0.146381	0.0012	0.124846	0.342121	0.55765	0.00072618	0.127215	13.6877	0	0	0	0	1	0	0	1
34	2015	S	0	0	0	0	0	7.49246	19.9203	0.045832	0.0469689	0.004	0.106973	0.342121	0.937892	0.000995049	0.124532	13.6877	0	0	0	0	1	0	0	1
34	2016	F	0	0	0	0	1.60944	11.4226	23.5587	0.722638	0.0460714	37.3559	0.0487744	0.458004	0.864111	7.21895e-05	0.012569	14.604	0	0	0	0	1	0	0	1
34	2018	F	0	0	2.63906	1	1.09861	12.1915	23.9808	0.905575	0.0205348	35.615	0.0402705	0.458004	0.678673	3.1693e-05	0.00655539	14.7034	0	0	0	0	1	0	0	1
34	2019	F	0	0	2.07944	1	2.07944	12.2872	24.105	0.822892	0.0253277	33.7892	0.0401681	0.438078	0.628879	3.04659e-05	0.00516721	14.5479	0	0	0	0	1	0	0	1
34	2020	F	0	0	2.77259	1	2.07944	12.2558	24.1472	0.811517	0.0207651	30.2992	0.0390479	0.383576	0.622439	2.59079e-05	0.00647814	14.7034	0	0	0	0	1	0	0	1
34	2021	F	0	0	2.48491	1	2.07944	12.5337	24.3856	0.925513	0.00717291	23.7356	0.0334797	0.374951	0.583012	2.3027e-05	0.00497431	14.7034	0	0	0	0	1	0	0	1
34	2022	F	0.693147	1	2.56495	1	2.19722	12.4778	24.4175	0.883815	0.0261723	23.3706	0.0392388	0.359895	0.725376	2.69374e-05	0.00481539	14.7034	0	0	0	0	1	0	0	1
35	2013	C39	0	0	0	0	0	6.22958	16.1613	0.005189	7.10894	0.0001	0.114437	0.168194	-5.13164	0.00227767	0.000878921	12.8992	0	1	0	0	1	1	0	0
35	2014	N	0	0	0	0	0	6.93863	21.9088	0.633464	0.106628	7.0971	0.517705	0.425833	0.884344	0.000905761	0.220344	13.9978	0	0	0	0	1	1	0	0
35	2015	N	0	0	0	0	0	7.31098	22.2046	0.468593	0.0594932	7.5815	0.494771	0.410437	0.624596	0.00100661	0.162701	14.152	0	0	0	0	1	1	0	0
35	2016	N	0	0	0	0	1.09861	7.35798	22.5148	0.564811	0.040726	7.5821	0.448436	0.459515	0.318008	0.00113197	0.172554	14.4033	0	0	0	0	1	1	0	0
35	2018	N	0	0	0	0	0.693147	7.72899	22.899	0.713402	0.0262466	6.9484	0.363827	0.423461	0.402045	0.00100795	0.150389	14.7067	0	0	0	0	1	1	0	0
35	2019	N	0	0	0	0	0.693147	9.35725	24.5797	0.96014	0.0274322	3.721	0.152443	0.285344	0.860467	0.000539252	0.158641	14.8451	0	0	0	0	1	1	0	0
35	2020	N	0	0	0.693147	0	0	9.46478	24.6428	1.04269	0.0169645	3.721	0.147257	0.285344	0.783042	0.000440869	0.161176	14.9972	0	0	0	0	1	1	0	0
35	2021	N	0	0	1.38629	1	0.693147	9.95838	23.9219	0.862555	0.0231858	3.721	0.141282	0.284195	1.11172	0.000627249	0.0817639	15.0964	0	0	0	0	1	1	0	0
35	2022		0	0	0.693147	0	0.693147	8.82419	23.9992	0.920316	0.00477221	3.721	0.196015	0.274072	0.656813	0.000645589	0.074379	15.1319	0	0	0	0	1	1	0	0
36	2012	K	0	0	0	0	0.693147	7.10399	22.1742	0.741027	0.0212399	0	0.624349	0.318832	1.54691	0.00167308	0.024019	13.3847	0	0	0	0	1	0	0	1
36	2013	K	0	0	0	0	0.693147	6.50665	22.1574	0.856969	0.0271503	0.0009	0.51432	0.318848	1.24462	0.00325616	0.0250554	13.3847	0	0	0	0	1	0	0	1
36	2014	K	0	0	0	0	0	6.26059	22.2425	0.636517	0.00687639	0.0009	0.534724	0.320176	0.447367	0.00357913	0.0638111	13.3847	0	0	0	0	1	0	0	1
36	2015	K	0	0	0	0	0.693147	6.93535	22.5895	0.464983	0.0171664	0.7023	0.637909	0.328858	0.78875	0.0020782	0.0438812	13.3847	0	0	0	0	1	0	0	1
36	2016	K	0	0	0	0	0.693147	8.24033	22.998	0.638305	0.167159	0.6513	0.717344	0.330276	0.610991	0.000469242	0.0989751	13.5924	0	0	0	0	1	0	0	1
36	2017	K	0	0	0	0	1.94591	8.85483	22.8887	0.626004	0.148815	0.6009	0.682246	0.348802	0.661017	0.000204851	0.106397	13.5924	0	0	0	0	1	0	0	1
36	2018	K	0	0	0.693147	0	0.693147	8.70702	23.1114	0.928006	0.105155	0.7113	0.721156	0.384587	1.2566	0.000266999	0.0766785	13.5924	0	0	0	0	1	0	0	1
36	2019	K	0	0	0	0	0.693147	8.66818	23.2199	0.942031	0.0773633	0.4007	0.727761	0.374441	1.42636	0.000253686	0.0672384	13.5924	0	0	0	0	1	0	0	1
36	2020	K	0	0	1.09861	1	0.693147	8.51569	23.1069	0.992646	0.0672507	0.3827	0.650224	0.348333	1.70834	0.000257114	0.0733711	13.7101	0	0	0	0	1	0	0	1
36	2021	K	0	0	0	0	0	8.16825	22.9836	0.95732	0.051641	0.3755	0.614992	0.352842	1.78063	0.000396652	0.0808997	13.7101	0	0	0	0	1	0	0	1
36	2022	K	0	0	0	0	0.693147	8.39212	22.9464	1.0277	0.0636745	0.2791	0.518517	0.358455	2.09841	0.000322349	0.0817449	13.7101	0	0	0	0	1	0	0	1
37	2012	D	1.09861	1	0	0	0	7.58343	22.4346	0.961493	-0.0427715	0.0025	-0.64943	0.428028	0.556037	0.000835979	0.368511	14.3461	1	0	0	0	1	0	1	0
37	2013	D	1.09861	1	0	0	0	7.4769	22.4171	0.973954	0.0133704	0.003	-0.452779	0.428028	0.573125	0.000928214	0.347834	13.4588	1	0	0	0	1	0	1	0
37	2014	D	0.693147	1	0	0	0	7.59487	22.3439	0.719153	-0.0803361	0.0029	-0.410666	0.428028	0.501257	0.000763903	0.363843	13.7101	1	0	0	0	1	0	1	0
37	2015	D	0	0	0	0	0	7.63548	22.2449	0.46929	-0.172126	0.0029	-0.109884	0.381046	0.63465	0.00113343	0.364093	13.4588	1	0	0	0	1	0	1	0
37	2016	D	0	0	0	0	0	7.82146	22.1966	0.592401	0.282831	0.0029	0.0833422	0.383063	1.40267	0.000671031	0.353957	13.7101	1	0	0	0	1	0	1	0
37	2017	D	0	0	0	0	0	8.11639	21.7824	0.704558	0.000104057	0.0031	0.0836869	0.383063	1.52775	0.000484029	0.49262	13.7101	1	0	0	0	1	0	1	0
37	2018	D	0	0	0	0	0	8.03737	21.9194	0.942194	0.00402291	0.0031	0.0704447	0.383063	1.35032	0.000496195	0.425034	13.7101	1	0	0	0	1	0	1	0
37	2019	D	0	0	0	0	0	7.61026	21.8924	0.497917	0.00787353	0.0031	0.131412	0.383063	1.46721	0.000895991	0.42919	13.7101	1	0	0	0	1	0	1	0
37	2020	D	0	0	0	0	0	7.53711	21.8288	0.546164	0.0217704	0.0031	0.193585	0.383063	2.23949	0.00113289	0.306454	13.3692	1	0	0	0	1	0	1	0
37	2021	D	0	0	0	0	0	7.38214	21.7493	0.621392	-0.175328	0.0029	-0.122937	0.383063	1.64114	0.00136411	0.230558	13.5008	1	0	0	0	1	0	1	0
37	2022	D	0	0	0.693147	0	0.693147	7.32252	21.6812	0.573829	-0.0687603	0.0029	-0.1591	0.383063	1.3846	0.00113939	0.226877	13.5008	1	0	0	0	1	0	1	0
39	2012	C33	0.693147	1	0	0	0	10.2746	24.8663	0.940727	0.0303159	0	0.179129	0.708804	0.816745	0.000684783	0.184288	15.5436	1	0	0	0	1	1	0	0
39	2013	C33	1.09861	1	0	0	0	10.2955	25.0083	0.912437	0.0388574	0.0187	0.16643	0.714102	0.792293	0.000698331	0.186046	15.7979	1	0	0	0	1	1	0	0
39	2014	C33	1.09861	1	0	0	0.693147	10.3805	25.1981	0.858198	0.0378337	0.0317	0.161291	0.704633	0.666966	0.000664538	0.217042	15.939	1	0	0	0	1	1	0	0
39	2015	C33	1.09861	1	0	0	1.60944	10.1707	25.3939	0.903183	0.0233573	0.0368	0.180701	0.695356	0.601914	0.000706642	0.20464	16.052	1	0	0	0	1	1	0	0
39	2016	C33	1.09861	1	0	0	1.38629	10.0423	25.5485	0.985229	0.0063531	0.0303	0.188404	0.750443	0.791654	0.000823413	0.176843	16.3547	1	0	0	0	1	1	0	0
39	2017	C33	1.09861	1	0	0	1.38629	10.4327	25.5954	0.925091	0.0247506	0.0224	0.183581	0.75115	0.791597	0.000718487	0.175653	16.2717	1	0	0	0	1	1	0	0
39	2018	C33	0.693147	1	1.09861	1	1.60944	10.6316	25.7914	1.05893	0.0281079	0.0316	0.148787	0.748489	0.753146	0.000551778	0.145948	16.5335	1	0	0	0	1	1	0	0
39	2019	C33	0.693147	1	1.60944	1	1.38629	10.4074	25.8714	1.05152	0.0151672	0.0316	0.145192	0.749557	0.705401	0.00060645	0.219916	16.0358	1	0	0	0	1	1	0	0
39	2020	C33	0.693147	1	1.09861	1	1.94591	10.5173	25.7083	0.999897	0.0377718	0.0315	0.142782	0.726255	0.868364	0.000520007	0.241511	16.1151	1	0	0	0	1	1	0	0
39	2021	C33	0.693147	1	1.09861	1	1.60944	11.0716	25.7623	0.987141	0.0556394	0.0315	0.180334	0.715158	0.906209	0.000354368	0.226768	16.2176	1	0	0	0	1	1	0	0
39	2022	C33	0	0	0	0	2.07944	10.8937	25.7062	1.07785	0.0306516	0.0315	0.152787	0.703134	0.951989	0.000495424	0.268694	16.3931	1	0	0	0	1	1	0	0
40	2012	K	0	0	0	0	0	7.9851	21.777	0.703889	0.0816145	0.1185	0.556363	0.353215	0.229608	0.000921816	0.0313992	13.1224	0	0	0	0	1	0	0	1
40	2013	K	0	0	0	0	0	7.9803	22.0997	0.850174	0.0301262	0.0426	0.423825	0.371057	0.272789	0.00100439	0.0183318	13.1224	0	0	0	0	1	0	0	1
40	2014	K	0	0	0	0	0	8.22338	22.1748	0.70383	0.0129213	0	0.33176	0.395026	0.305528	0.000759003	0.0166184	13.1224	0	0	0	0	1	0	0	1
40	2015	K	0	0	0	0	0	8.67245	22.6356	0.546157	0.0112413	0	0.331637	0.357483	0.905874	0.000584843	0.00989225	13.3047	0	0	0	0	1	0	0	1
40	2016	K	0	0	0	0	0	9.16283	23.5733	0.900957	0.014577	0	0.165999	0.410891	2.83033	0.000414787	0.0116486	13.487	0	0	0	0	1	0	0	1
40	2017	E	0	0	0	0	0	9.1205	24.0872	0.839496	0.0233783	0	0.163567	0.409525	1.82467	0.000403699	0.0946786	13.9978	0	0	0	0	1	0	0	1
40	2018	D	1.09861	1	0	0	0	9.00246	24.262	1.08597	0.0355755	0	0.141142	0.469158	1.33538	0.000363314	0.163757	14.221	0	0	0	0	1	0	1	0
40	2019	D	1.09861	1	0	0	0	8.85782	24.1568	1.20211	-0.0292655	0	0.128633	0.438143	1.21219	0.000395535	0.187852	14.221	0	0	0	0	1	0	1	0
40	2020	D	0.693147	1	0	0	1.09861	8.25481	23.9891	1.23562	-0.0364057	0	0.130886	0.429755	1.30751	0.000494683	0.201514	14.221	0	0	0	0	1	0	1	0
40	2021	D	1.09861	1	0.693147	0	1.09861	8.39105	23.9872	1.18665	-0.023063	0	0.17183	0.427475	1.16318	0.00043913	0.2064	14.221	0	0	0	0	1	0	1	0
40	2022		0.693147	1	0	0	0	8.14201	23.9609	1.19404	-0.0119559	0	0.166134	0.427475	1.39317	0.000347996	0.212204	14.221	0	0	0	0	1	0	1	0
42	2012	K	0	0	0	0	0	9.1772	22.7404	0.797335	0.0561744	0.0377	0.494678	0.577496	0.712666	0.000513406	0.00941599	13.3847	1	0	0	0	1	0	0	1
42	2013	K	0	0	0	0	0	8.92237	22.8025	0.723123	0.0522727	0.0377	0.485057	0.526521	0.45342	0.000747512	0.0106646	13.7642	0	0	0	0	1	0	0	1
42	2014	K	0	0	0	0	0	9.24351	23.5081	0.800359	0.0252635	0.0377	0.427087	0.529961	0.180361	0.000511452	0.0050498	13.7642	0	0	0	0	1	0	0	1
42	2015	K	0	0	0	0	0.693147	8.88535	23.9269	0.804893	0.0195921	0.6822	0.398735	0.628873	0.342403	0.000473411	0.0592101	13.5278	0	0	0	0	1	0	0	1
42	2017	K	0	0	0	0	0	9.40223	24.4988	0.93832	0.0167322	0.4896	0.362794	0.629098	0.38917	0.000409739	0.0319146	14.8522	0	0	0	0	1	0	0	1
42	2018	K	0	0	0	0	0.693147	9.33631	24.553	1.00449	0.00925497	0.3162	0.470812	0.644433	0.522228	0.000576601	0.0272326	14.4935	0	0	0	0	1	0	0	1
42	2019	K	0	0	0	0	0	9.2676	24.5331	1.0178	0.0147723	0.3162	0.399645	0.648476	0.28298	0.00072026	0.0249084	14.5479	0	0	0	0	1	0	0	1
42	2020	K	0	0	0	0	0	9.68025	24.5175	1.04993	0.00357122	0.1728	0.272498	0.677014	0.377888	0.000327633	0.0242514	14.5479	0	0	0	0	1	0	0	1
42	2021	K	0	0	0	0	0	9.47495	24.4475	1.07431	0.00152145	0.1728	0.29542	0.609258	0.404985	0.000404557	0.0251961	14.5479	0	0	0	0	1	0	0	1
42	2022	K	0	0	0	0	0	9.28986	24.3257	1.08691	0.000230548	0.1688	0.358012	0.667028	0.271964	0.000381644	0.0264239	14.5479	0	0	0	0	1	0	0	1
45	2012	F	0	0	0	0	0	7.25562	21.3549	0.757995	-0.0439097	0.0297	0.0426494	0.59415	1.35332	0.00147614	0.504697	12.8992	1	0	0	0	1	0	0	1
45	2013	F	0	0	0	0	0	7.54957	21.7712	0.739945	0.0199571	0.0184	0.0381581	0.538333	5.67679	0.00126512	0.307966	13.017	1	0	0	0	1	0	0	1
45	2014	F	0	0	0	0	0	7.63667	21.761	0.574956	-0.0400354	0.0184	0.0464172	0.51217	3.25719	0.000986794	0.292219	13.017	1	0	0	0	1	0	0	1
45	2015	C39	0	0	0	0	0	7.67686	21.8116	0.418366	0.00293403	0.0184	0.068666	0.534199	2.74739	0.000839983	0.266054	13.017	1	1	0	0	1	1	0	0
45	2016	C39	0	0	0	0	0	7.68066	22.139	0.556059	-0.0246215	0.0184	0.0584758	0.506559	5.52638	0.000892186	0.175669	13.1224	1	1	0	0	1	1	0	0
45	2017	C39	0	0	0	0	0	7.91059	22.1573	0.775281	0.0177171	0.1631	0.119239	0.500428	5.20696	0.000775012	0.156381	13.2177	1	1	0	0	1	1	0	0
45	2018	C39	0	0	0	0	0	7.64388	22.2535	1.15516	-0.0141357	0.1645	0.102256	0.497057	2.50044	0.00069627	0.213863	13.3047	1	1	0	0	1	1	0	0
45	2019	C39	0	0	0	0	0	8.19811	22.2343	1.06145	-0.00404928	0.1068	0.0855762	0.497899	3.77893	0.000448853	0.199327	13.3847	1	1	0	0	1	1	0	0
45	2020	C39	0	0	0	0	0	8.21124	22.3266	1.10774	0.00915649	0.0636	0.139721	0.499088	3.10369	0.000498325	0.159005	13.6268	1	1	0	0	1	1	0	0
45	2021	C39	0	0	0	0	0	7.9541	22.4411	0.90966	0.0142504	0.019	0.188389	0.505817	2.34346	0.000532268	0.431704	13.3847	1	1	0	0	1	1	0	0
45	2022	C39	0	0	0	0	0	8.19142	22.4491	0.822126	0.0199812	0.019	0.16349	0.506212	2.70502	0.000452394	0.398819	14.2538	1	1	0	0	1	1	0	0
48	2012	C13	0	0	0	0	1.60944	8.09664	20.9153	0.367672	0.0244762	0	0.105449	0.30716	0.742116	0.000788642	0.264498	13.5278	0	0	0	0	1	0	0	1
48	2013	C13	0	0	0	0	2.07944	8.11471	21.0089	0.261892	-0.00781827	0	0.10858	0.30225	0.415665	0.000842695	0.289626	14.0779	0	0	0	0	1	0	0	1
48	2014	C13	0	0	0	0	2.70805	8.44447	21.4078	0.366515	0.0725327	0	0.248475	0.444588	0.605055	0.00074481	0.183497	13.653	0	0	0	0	1	0	0	1
48	2015	C13	0	0	0	0	2.30259	8.52554	21.3864	0.128866	0.106927	1.8345	0.314215	0.43655	0.903605	0.000898987	0.174782	13.7642	0	0	0	0	1	0	0	1
48	2017	C13	0	0	0	0	0	7.95729	22.0855	0.357033	-0.047321	1.8345	0.152532	0.645353	0.539371	0.00124848	0.15967	14.6826	0	0	0	0	1	0	0	1
48	2018	C13	0.693147	1	1.09861	1	0.693147	8.74089	22.3686	0.472794	0.0989381	0.0209	0.428565	0.737676	0.60761	0.000503452	0.126002	14.2855	0	0	0	0	1	0	0	1
48	2019	C13	0.693147	1	0	0	1.38629	9.25309	22.5907	0.505658	0.198764	0.0209	0.524282	0.739672	0.709542	0.00049504	0.0781497	14.152	0	0	0	0	1	0	0	1
48	2020	C13	0.693147	1	0	0	1.09861	8.98538	23.0162	0.606158	0.107197	0	0.566485	0.74979	0.669763	0.000466872	0.0543408	13.9725	0	0	0	0	1	0	0	1
48	2021	C13	0.693147	1	0	0	0.693147	8.17457	23.4201	0.695363	0.0322271	0	0.504922	0.762859	0.393124	0.000718136	0.215462	13.9725	0	0	0	0	1	0	0	1
48	2022	C13	0.693147	1	0	0	0.693147	8.65049	23.5875	0.724227	0.0491894	0	0.337351	0.708882	0.242526	0.00035633	0.275016	13.9725	0	0	0	0	1	0	0	1
49	2012	C38	0	0	0	0	1.60944	9.05968	21.3445	0.333565	0.104086	0	0.166411	0.543014	1.0743	0.000687642	0.06045	13.2177	1	1	0	0	1	1	0	0
49	2013	C38	0	0	0	0	1.94591	9.34931	21.9385	0.273536	0.105129	0	0.145265	0.535046	1.01279	0.000494797	0.0352202	13.3047	1	1	0	0	1	1	0	0
49	2014	C38	0	0	0	0	1.79176	9.61576	22.2656	0.470427	0.0777664	0	0.106943	0.475128	1.00339	0.000332538	0.0347421	13.3047	1	1	0	0	1	1	0	0
49	2015	C38	0	0	0.693147	0	1.79176	9.86276	21.9478	0.245522	0.0762783	0	0.0891901	0.507271	1.07721	0.000307473	0.0522766	13.3047	1	1	0	0	1	1	0	0
49	2016	C38	0	0	1.38629	1	2.19722	9.79132	22.3614	0.419169	0.0818137	0	0.0970835	0.512832	0.975102	0.000377802	0.0440996	13.3047	1	1	0	0	1	1	0	0
49	2017	C38	0	0	1.60944	1	2.19722	9.81929	22.7539	0.546976	0.0569955	0	0.0880064	0.498299	0.789003	0.00040141	0.0866833	13.3047	1	1	0	0	1	1	0	0
49	2018	C38	0	0	1.94591	1	2.30259	10.1315	22.9005	0.708951	0.0639392	0	0.0819827	0.500102	0.807055	0.000108444	0.0778159	13.4298	1	1	0	0	1	1	0	0
49	2019	C38	0	0	2.07944	1	2.19722	10.142	22.8946	0.613404	0.0761518	0.0724	0.083611	0.503392	0.966055	0.0001172	0.0980514	13.4298	1	1	0	0	1	1	0	0
49	2020	C38	0	0	1.94591	1	2.48491	10.1697	22.9248	0.449312	0.0831331	0.0724	0.0867106	0.51292	0.907695	0.000115578	0.102593	13.4298	1	1	0	0	1	1	0	0
49	2021	C38	0	0	1.38629	1	2.77259	10.19	23.1007	0.434962	0.0801308	0.0724	0.0936501	0.469928	0.872248	0.000138619	0.0791009	13.4298	1	1	0	0	1	1	0	0
49	2022		0	0	1.09861	1	3.17805	10.0564	23.2502	0.587416	0.0731897	0.0355	0.0985244	0.473615	0.923434	0.00018135	0.155688	13.653	1	1	0	0	1	1	0	0
50	2012	C39	0	0	0	0	0	8.25369	22.7778	0.840025	0.017352	0.0039	0.143665	0.568226	0.662008	0.000844172	0.565474	13.8155	1	1	0	0	1	1	0	0
50	2013	C39	0	0	0	0	0	8.32067	22.7998	0.713865	0.03619	0.0039	0.181448	0.545555	0.806098	0.000994313	0.499792	13.8155	1	1	0	0	1	1	0	0
50	2014	C39	0	0	0	0	1.38629	8.78737	23.4764	0.702099	0.0580441	0.002	0.186529	0.446504	0.761271	0.00107351	0.498074	14.3461	1	1	0	0	1	1	0	0
50	2015	C39	1.09861	1	0	0	2.3979	8.94783	23.7973	0.707014	0.0297725	0.0106	0.163369	0.446504	1.60525	0.00120654	0.316504	14.3461	1	1	0	0	1	1	0	0
50	2017	C39	0	0	0	0	3.04452	9.21916	24.1128	0.692934	0.0314506	0.0073	0.208493	0.355664	0.946889	0.00111534	0.223326	14.3461	1	1	0	0	1	1	0	0
50	2018	C39	0.693147	1	0.693147	0	2.94444	9.41631	24.8182	1.07223	0.0219397	0.0031	0.151907	0.417648	0.601555	0.000265301	0.487196	14.6484	1	1	0	0	1	1	0	0
50	2019	C39	0.693147	1	1.79176	1	2.83321	9.47454	24.9046	0.916742	0.0132182	0.0031	0.168469	0.420235	0.541838	0.000360401	0.431558	14.6264	1	1	0	0	1	1	0	0
50	2020	C39	0.693147	1	1.09861	1	2.48491	9.46214	25.0213	0.973806	0.0212148	0.0021	0.194283	0.357155	0.649901	0.000337382	0.363044	14.622	1	1	0	0	1	1	0	0
50	2021	C39	0.693147	1	1.38629	1	3.04452	9.61105	25.1107	1.03465	0.0200332	0.0016	0.183381	0.357155	0.647404	0.000317496	0.302078	14.622	1	1	0	0	1	1	0	0
50	2022	C39	0.693147	1	1.60944	1	2.70805	9.61871	25.1176	1.12002	0.00133557	0.0016	0.129014	0.357155	0.810409	0.000348244	0.284324	14.6657	1	1	0	0	1	1	0	0
55	2012	C33	0	0	0	0	0	7.9619	21.5682	0.627343	0.00286932	0.0184	0.180867	0.159701	1.00615	0.000877586	0.146729	14.0779	0	0	0	0	1	1	0	0
55	2013	C33	0	0	0	0	0	8.13251	21.6786	0.571051	0.0330403	0.1373	0.184394	0.166058	1.01252	0.000728157	0.17808	14.0779	0	0	0	0	1	1	0	0
55	2014	C33	0	0	0	0	0.693147	8.17938	22.0215	0.46021	0.0296024	0.1373	0.179272	0.180498	0.754224	0.000787199	0.133702	14.0779	0	0	0	0	1	1	0	0
55	2015	C33	0	0	0	0	0	8.49857	22.2193	0.398465	0.0167876	0.1712	0.148578	0.198532	0.734005	0.000656373	0.103637	14.0779	0	0	0	0	1	1	0	0
55	2016	C33	0	0	0	0	0	8.97089	22.6383	0.542586	0.116608	0.1642	0.382671	0.202242	1.07858	0.000408962	0.0746744	14.0779	0	0	0	0	1	1	0	0
55	2017	C33	0	0	0.693147	0	0	8.64843	22.7548	0.726694	0.159729	0.1596	0.32205	0.204778	1.16909	0.000518467	0.0613892	14.221	0	0	0	0	1	1	0	0
55	2018	C33	0	0	0	0	0	8.68745	23.0897	1.10639	0.245694	0.1652	0.233128	0.209168	1.1486	0.000459224	0.0427132	14.221	0	0	0	0	1	1	0	0
55	2019	C33	0	0	1.09861	1	0	8.65065	23.1542	1.05973	0.0314825	0.1699	0.278324	0.225731	0.880169	0.000567059	0.0419819	14.221	0	0	0	0	1	1	0	0
55	2020	C33	0	0	0	0	0.693147	8.64532	23.197	1.13008	0.0328597	0.282	0.191612	0.23318	1.01215	0.000475849	0.0407152	14.221	0	0	0	0	1	1	0	0
55	2021	C33	0	0	0	0	0	8.70103	23.2297	1.12526	0.0187995	0.2858	0.223858	0.24221	1.05564	0.00047627	0.0541062	14.221	0	0	0	0	1	1	0	0
55	2022	C33	0	0	1.09861	1	0.693147	8.78808	23.2684	1.16934	0.0228864	0.4767	0.241546	0.246199	1.08226	0.000408472	0.0507496	14.221	0	0	0	0	1	1	0	0
56	2012	K	0	0	0	0	0	5.81185	21.4196	0.412447	-0.0090759	0.2587	0.198568	0.266988	0.108004	0.00615856	0.0325257	13.7101	0	0	0	0	1	0	0	1
56	2013	K	0	0	0	0	0.693147	4.99486	22.7778	1.02799	0.789691	0.2587	0.308384	0.229854	0.010682	0.0198702	0.0079181	13.7101	0	0	0	0	1	0	0	1
56	2014	K	0	0	0	0	0.693147	5.99099	22.7866	1.01716	-0.0692556	0.2587	0.3687	0.224934	0.0597907	0.00742015	0.007701	13.7101	0	0	0	0	1	0	0	1
56	2015	K	0	0	0	0	0	7.02062	22.8022	0.674455	0.0048331	0.1195	0.724808	0.527618	0.456404	0.00194947	0.00716862	13.7101	0	0	0	0	1	0	0	1
56	2016	K	0	0	0	0	0.693147	7.22428	23.0879	0.818311	0.0124925	0.1195	0.699248	0.527618	3.84308	0.00190544	0.00511525	13.7101	0	0	0	0	1	0	0	1
56	2018	K	0	0	0	0	0.693147	8.27406	23.3076	1.07182	0.00865374	0.7758	0.632183	0.511392	1.28775	0.00133936	0.00386177	13.7101	0	0	0	0	1	0	0	1
56	2019	L	0	0	0	0	1.38629	8.31907	23.2455	1.10718	0.00593303	0.707	0.700564	0.503215	0.817483	0.00107266	0.00372634	13.7101	0	0	0	0	1	0	0	1
56	2020	L	0	0	0	0	1.38629	7.95837	23.1877	1.16789	-0.0264033	0.7074	0.650368	0.494747	0.237215	0.0014427	0.00378801	13.8155	0	0	0	0	1	0	0	1
56	2021	L	0	0	0	0	1.09861	8.10114	23.1144	0.832402	-0.110917	0.2952	0.706054	0.467924	0.24483	0.00135401	0.00364368	13.9978	0	0	0	0	1	0	0	1
56	2022		0.693147	1	0.693147	0	0		23.039	0.805515	-0.114015	0.0844	0.68092	0.415429	0.155545	0.0013279	0.011112	13.9978	0	0	0	0	1	0	0	1
58	2012	L	0	0	0	0	3.43399	7.70256	21.2776	0.569066	0.0323715	0.006	0.232766	0.336653	2.50207	0.00112101	0.0247984	12.6115	1	0	0	0	1	0	0	1
58	2013	L	0	0	0	0	3.58352	7.94224	21.4817	0.548434	0.0375675	0.0045	0.18573	0.324051	1.5579	0.000782457	0.0196149	13.017	1	0	0	0	1	0	0	1
58	2014	L	0	0	0	0	3.49651	8.06612	21.7015	0.482074	0.0328174	0.0045	0.176709	0.32125	1.08351	0.00066642	0.0155687	13.017	1	0	0	0	1	0	0	1
58	2016	L	0	0	0	0	4.14313		21.6587	0.325939	0.0550967	0.0118	0.139637	0.316675	0.854681	0.000892972	0.0153758	13.017	1	0	0	0	1	0	0	1
58	2017	L	0	0	0	0	1.60944	8.80697	22.6681	0.69245	0.0645695	0.018	0.294154	0.575862	0.481328	0.000726939	0.00892445	13.8643	1	0	0	0	1	0	0	1
58	2018	L	0	0	0	0	1.79176	8.62615	22.6873	0.761786	0.00333494	0.017	0.338399	0.575319	0.808781	0.000759615	0.0083265	13.5924	1	0	0	0	1	0	0	1
58	2019	L	0	0	0	0	0.693147	8.52588	22.5463	0.678575	0.0154922	0.006	0.340055	0.575478	0.862245	0.000896449	0.00998006	13.5924	1	0	0	0	1	0	0	1
58	2020	L	0	0	0.693147	0	0	8.08331	22.4865	0.698195	0.00502153	0.0148	0.298402	0.580204	0.68634	0.000748901	0.0404934	13.5924	1	0	0	0	1	0	0	1
58	2021	L	0	0	0	0	0	8.23908	22.4518	0.701953	0.0172422	0.0134	0.217251	0.577317	0.8626	0.000617447	0.0471199	13.5924	1	0	0	0	1	0	0	1
58	2022		0	0	0	0	0	8.16174	22.3945	0.480155	0.00731473	0.0135	0.156227	0.576055	0.796304	0.000655623	0.0488493	13.5924	1	0	0	0	1	0	0	1
59	2012	C25	0	0	0	0	0	9.91681	24.2123	0.976536	0.000650466	0.0005	0.120327	0.533884	0.316069	0.000350626	0.566702	14.4833	1	1	0	0	1	0	1	0
59	2013	C25	0	0	0	0	0	10.0871	24.0712	1.04561	-0.00529391	0.0005	0.101732	0.536229	0.252898	0.000368481	0.589841	14.4833	1	1	0	0	1	0	1	0
59	2014	C25	0	0	0	0	0	10.1297	24.267	0.880191	-0.0471465	0.0003	0.0694728	0.54382	0.33039	0.000307365	0.509679	14.4833	1	1	0	0	1	0	1	0
59	2015	C25	0	0	0	0	0	9.81133	24.1218	0.918428	0.0112381	0.0003	0.158861	0.544698	0.327796	0.000489959	0.500078	14.4833	1	1	0	0	1	0	1	0
59	2016	C25	0	0	0	0	0.693147	9.77241	24.1691	0.818468	0.0603073	0.0003	0.281852	0.485776	0.451025	0.000548538	0.457287	14.4833	1	1	0	0	1	0	1	0
59	2017	C25	0	0	0	0	0.693147	9.93302	24.1562	0.932075	0.0622776	0.0003	0.238197	0.478554	0.519155	0.000481307	0.451586	14.4833	1	1	0	0	1	0	1	0
59	2018	C25	0	0	0	0	0.693147	10.0501	24.2033	1.14993	0.035433	0	0.172135	0.478554	1.29301	0.000447727	0.416288	14.4833	1	1	0	0	1	0	1	0
59	2019	C25	0	0	0	0	0	10.1125	24.1029	1.17655	0.0339365	0	0.145578	0.478554	1.05768	0.000386317	0.476198	14.3343	1	1	0	0	1	0	1	0
59	2020	C25	0	0	0	0	0	9.8794	24.0519	1.23359	0.0120499	0.0028	0.123522	0.478554	1.34122	0.000431982	0.457726	14.3343	1	1	0	0	1	0	1	0
59	2021	C25	0	0	0	0	0	10.135	24.1926	1.11221	0.0312316	0.0025	0.209074	0.470363	1.9212	0.000429272	0.376748	14.3343	1	1	0	0	1	0	1	0
59	2022	C25	0	0	0	0	0	10.3826	24.2086	1.14879	0.0185573	0	0.165343	0.470363	1.19467	0.000227751	0.358592	14.3343	1	1	0	0	1	0	1	0
60	2012	C32	0	0	0	0	0	9.68806	23.3675	0.54887	0.0379855	0.1089	0.116938	0.395986	0.488692	0.000375125	0.279693	13.9978	1	1	0	0	1	0	0	1
60	2013	C32	0	0	0	0	0	9.82263	23.3939	0.68607	0.0295245	0.1229	0.0693157	0.4124	0.489978	0.000283135	0.278473	13.8155	1	1	0	0	1	0	0	1
60	2014	C32	0	0	0	0	0	9.94457	23.3776	0.521656	0.0384247	0.0914	0.0608906	0.408159	0.410855	0.000229075	0.317025	13.8155	1	1	0	0	1	0	0	1
60	2015	C32	0	0	0	0	0	9.57401	23.4885	0.424065	0.0173244	0.0687	0.0600611	0.379862	0.57675	0.000302002	0.311643	13.8832	1	1	0	0	1	0	0	1
60	2016	C32	0	0	0	0	0	9.42105	23.5547	0.50781	0.0208152	0.0626	0.111319	0.374557	0.620554	0.000350035	0.29962	13.7429	1	1	0	0	1	0	0	1
60	2017	C32	0	0	0	0	0	9.63799	23.6608	0.556559	0.0610276	0.0531	0.142083	0.337102	0.894671	0.000391135	0.287279	13.8255	1	1	0	0	1	0	0	1
60	2018	C32	0	0	0	0	0	9.65909	23.694	0.850916	0.0474045	0.0481	0.134964	0.337102	0.775169	0.000236058	0.306365	13.8738	1	1	0	0	1	0	0	1
60	2019	C32	0	0	0	0	0	9.73937	23.7349	0.836067	0.0437587	0.0301	0.0909583	0.337102	0.791226	0.000233967	0.356061	13.8738	1	1	0	0	1	0	0	1
60	2020	C32	0	0	0	0	0	10.0106	23.9157	0.848047	0.0492442	0.0301	0.0687454	0.337102	1.42963	0.000168027	0.305715	13.8738	1	1	0	0	1	0	0	1
60	2021	C32	0	0	0	0	0	10.3873	24.0412	0.86913	0.0470088	0.0016	0.0595972	0.359632	0.882574	0.000119863	0.279931	13.8738	1	1	0	0	1	0	0	1
60	2022	C32	0.693147	1	0	0	0	10.4962	24.2092	0.999118	0.0410033	0.0016	0.0511217	0.377315	0.660593	9.40097e-05	0.345355	13.8738	1	1	0	0	1	0	0	1
61	2012	L	0	0	0	0	1.38629	7.45887	23.0857	0.750494	0.0104526	1.3036	0.354077	0.32643	0.478277	0.00234677	0.27521	14.3163	1	0	0	0	1	0	0	1
61	2013	L	0	0	0	0	3.63759	7.74847	23.2266	0.648686	0.0189027	0.5777	0.381334	0.396025	0.683332	0.00179921	0.228061	14.2855	1	0	0	0	1	0	0	1
61	2014	L	0	0	0	0	4.23411	7.43319	23.3483	0.475771	0.010404	0.4253	0.46052	0.505016	0.452875	0.00246013	0.223005	14.4833	1	0	0	0	1	0	0	1
61	2015	L	0	0	0	0	3.7612	7.49838	23.504	0.415713	0.00295736	0.427	0.485556	0.524986	0.355373	0.00243664	0.176078	14.3751	1	0	0	0	1	0	0	1
61	2016	L	0	0	0	0	3.58352	7.76276	23.571	0.539962	0.00558852	0.4175	0.349203	0.544986	0.386545	0.00198316	0.112332	14.4307	1	0	0	0	1	0	0	1
61	2017	L	0	0	0	0	3.61092	8.00808	23.6594	0.741083	0.00338975	0.1212	0.377474	0.544986	0.439715	0.00158004	0.0866622	14.4307	1	0	0	0	1	0	0	1
61	2018	L	0	0	0	0	3.80666	7.90433	23.6677	0.920611	0.00529692	0.0231	0.370658	0.597362	0.436389	0.00166559	0.101337	14.4033	1	0	0	0	1	0	0	1
61	2019	L	0	0	0	0	3.46574	8.10836	23.6988	0.882333	0.0210806	0.022	0.361508	0.597362	0.475808	0.00139492	0.103337	14.3808	1	0	0	0	1	0	0	1
61	2020	L	0	0	0.693147	0	3.4012	8.21629	23.6888	0.799416	0.0226687	0.0022	0.360179	0.597362	0.357375	0.0012987	0.102176	14.3808	1	0	0	0	1	0	0	1
61	2021	L	0	0	0	0	3.2581	8.46742	23.7519	0.859918	0.0247326	0.0022	0.324545	0.597362	0.385911	0.0011274	0.0972841	14.4033	1	0	0	0	1	0	0	1
61	2022		0	0	0	0	2.94444	8.5099	23.7672	0.906851	0.0157158	0.0022	0.276862	0.597362	0.33831	0.00100975	0.102703	14.1156	1	0	0	0	1	0	0	1
62	2012	L	0	0	0	0	3.89182	8.20375	22.3323	0.673609	0.0585598	0.0015	0.526151	0.754975	0.569481	0.000978613	0.051617	13.653	0	0	0	0	1	0	0	1
62	2015	L	0	0	0	0	3.73767	8.36309	22.545	0.227367	0.0730724	2.8641	0.338789	0.757429	1.21511	0.000746479	0.061361	14.0779	0	0	0	0	1	0	0	1
62	2016	L	0	0	0	0	3.43399	9.41202	22.6581	0.313295	0.06712	2.8641	0.191587	0.757429	1.07917	0.000347736	0.0474809	13.8643	0	0	0	0	1	0	0	1
62	2017	F	0	0	0	0	3.7612	9.82076	22.871	0.426257	0.0589759	2.8641	0.162031	0.757429	1.00243	0.000313776	0.036111	14.152	0	0	0	0	1	0	0	1
62	2018	F	0	0	0.693147	0	3.49651	10.1866	23.0556	0.600154	0.0815766	0.1612	0.157426	0.757429	1.09111	0.000235779	0.0282103	14.221	0	0	0	0	1	0	0	1
62	2019	F	0	0	1.38629	1	3.17805	10.4149	23.1525	0.553093	0.0662514	0.1618	0.111551	0.757429	1.10308	0.000162185	0.0229845	14.221	0	0	0	0	1	0	0	1
62	2020	F	0	0	0.693147	0	2.48491	10.5492	23.2281	0.639478	0.0610167	0.1729	0.0989102	0.756861	1.36654	0.000127427	0.0209519	14.1662	0	0	0	0	1	0	0	1
62	2021	F	0	0	0.693147	0	2.48491	10.8861	23.4812	0.584468	0.074457	0.1729	0.11389	0.707561	1.21397	0.000135993	0.0151417	14.1448	0	0	0	0	1	0	0	1
62	2022	F	0	0	0.693147	0	2.99573	10.9425	23.5183	0.768092	0.0672082	0.1736	0.10756	0.707561	1.18106	0.000173757	0.0135498	14.1448	0	0	0	0	1	0	0	1
63	2021	C39	1.79176	1	1.60944	1	2.63906	11.0011	25.8518	0.661175	0.0440571	0.0133	0.352438	0.395372	1.20555	0.000475422	0.0677695	15.8824	0	1	0	0	1	1	0	0
63	2022	C39	1.60944	1	1.09861	1	2.3979	11.0461	25.9215	0.773843	0.0445595	0.0205	0.371901	0.395443	1.22096	0.000433716	0.0713626	15.9318	0	1	0	0	1	1	0	0
65	2012	E	0	0	0	0	0	9.16398	21.8832	0.802739	0.0518738	0	0.0614455	0.630026	0.988008	0.000299557	0.00750289	13.0815	1	0	0	0	1	0	0	1
65	2013	E	0	0	0	0	0	9.21797	22.1052	0.680746	0.0546475	0	0.140058	0.633196	1.04893	0.000192687	0.0352911	13.1806	1	0	0	0	1	0	0	1
65	2014	E	0	0	0	0	0	9.24596	22.3162	0.590323	0.0504067	0	0.11391	0.625437	1.07473	0.000197469	0.028067	13.1806	1	0	0	0	1	0	0	1
65	2016	E	0.693147	1	0	0	0.693147	9.80263	23.2204	0.60307	0.0563069	0	0.118693	0.609444	1.12665	0.00020842	0.0314801	13.7953	1	0	0	0	1	0	0	1
65	2017	E	0.693147	1	0	0	0	9.85896	23.1625	0.734324	0.0460064	0	0.13788	0.609444	1.36267	0.000179729	0.0396558	13.8643	1	0	0	0	1	0	0	1
65	2018	E	0.693147	1	0	0	0	9.91142	23.1611	0.915009	0.0539271	0	0.148075	0.620996	1.44082	0.000188549	0.0367389	13.9639	1	0	0	0	1	0	0	1
65	2019	E	0	0	0	0	0	9.94283	23.4142	0.937529	0.0564682	0	0.145183	0.611397	1.27722	0.000184054	0.0381106	14.1007	1	0	0	0	1	0	0	1
65	2020	E	0.693147	1	0.693147	0	0	9.98133	23.6181	1.02411	0.0477736	0	0.100201	0.609436	1.63713	0.000175248	0.0437825	14.2076	1	0	0	0	1	0	0	1
65	2021	E	0.693147	1	0	0	0.693147	9.74331	23.6856	1.00899	0.0361817	0	0.106925	0.605527	1.36169	0.000207028	0.0983771	14.152	1	0	0	0	1	0	0	1
65	2022	E	0	0	0	0	0	9.66245	23.818	1.01219	0.0387865	0	0.137432	0.608621	1.5074	0.000218378	0.125692	14.1871	1	0	0	0	1	0	0	1
66	2012	C39	1.60944	1	0	0	0	11.0033	24.3915	1.06893	0.00265203	0.0024	0.081525	0.543658	0.817687	0.000417539	0.101545	13.6877	1	1	0	0	1	1	0	0
66	2013	C39	1.60944	1	0	0	1.09861	11.0051	24.3926	1.10327	-0.0194587	0.0024	0.0846391	0.572043	0.791238	0.000410598	0.0942956	13.6877	1	1	0	0	1	1	0	0
66	2014	C39	1.79176	1	0	0	1.09861	11.0093	24.4258	1.02231	-0.00851869	0.0024	0.0983112	0.562269	0.764448	0.000420353	0.0881988	13.6877	1	1	0	0	1	1	0	0
66	2016	C39	1.60944	1	0.693147	0	1.09861	11.4429	24.4334	0.854453	0.00534464	0.0024	0.0979823	0.553321	1.27416	0.000423374	0.0137794	13.6877	1	1	0	0	1	1	0	0
66	2017	C39	1.79176	1	0.693147	0	1.94591	9.21812	23.4447	0.563737	0.0248325	0.0011	0.216691	0.426607	1.17236	0.00116359	0.122338	13.6877	1	1	0	0	1	1	0	0
66	2018	C39	1.79176	1	2.56495	1	1.79176	9.26035	23.496	0.721902	0.0677075	0.0152	0.219272	0.423441	1.04279	0.000605736	0.119958	15.2018	1	1	0	0	1	1	0	0
66	2019	C39	1.60944	1	1.79176	1	3.04452	9.23527	23.7992	0.408358	0.061894	0.0132	0.246654	0.438531	1.08047	0.000541713	0.128356	15.2018	1	1	0	0	1	1	0	0
66	2020	C39	1.09861	1	1.09861	1	2.48491	9.49626	24.0386	0.37312	0.0396165	0.0054	0.226188	0.440098	1.10591	0.000503933	0.105328	15.3196	1	1	0	0	1	1	0	0
66	2021	C39	1.38629	1	1.38629	1	2.48491	9.604	24.211	0.514723	0.0226586	0.0095	0.209014	0.440097	0.839352	0.000605764	0.121355	15.3196	1	1	0	0	1	1	0	0
66	2022		1.60944	1	0.693147	0	2.3979	9.35211	24.2458	0.657901	0.00679688	0.0086	0.252115	0.433151	1.10364	0.000672022	0.125769	15.305	1	1	0	0	1	1	0	0
68	2012	C39	0	0	0	0	1.09861	5.92622	19.8706	0.09831	0.00773116	0	0.0550488	0.525314	0.68294	0.00265299	0.595612	12.6115	1	1	0	0	1	1	0	0
68	2013	C39	0	0	0	0	0	7.87591	20.1983	0.11086	-0.0730975	0	0.0228244	0.525314	0.853171	0.000466608	0.362775	12.6115	1	1	0	0	1	1	0	0
68	2014	C39	0	0	0	0	0.693147	5.33698	19.8575	0.05168	-0.208206	0	0.381053	0.474913	0.514684	0.00728651	0.487744	12.6115	0	1	0	0	1	1	0	0
68	2015	C39	0	0	0	0	1.38629	6.24222	20.446	0.065738	0.0138023	0	0.378942	0.53229	4.14964	0.00369891	0.258005	12.6115	0	1	0	0	1	1	0	0
68	2016	C39	0	0	0	0	1.09861	6.7954	20.9961	0.16298	0.00842178	0.0001	0.424144	0.52229	1.48708	0.00292686	0.143959	12.6115	0	1	0	0	1	1	0	0
68	2017	C39	0	0	0	0	0	7.10882	21.7542	0.440925	0.0158566	0.0001	0.42814	0.502356	0.682929	0.00187988	0.0637098	13.1224	0	1	0	0	1	1	0	0
68	2018	C39	0	0	0	0	0	6.43518	21.9598	0.507493	-0.044719	0.0001	0.272818	0.492783	0.658903	0.00403635	0.0484958	13.1224	0	1	0	0	1	1	0	0
68	2021	M	0	0	1.09861	1	0	7.87557	22.1165	0.587744	-0.0305635	0	0.0897059	0.452415	0.794664	0.000819684	0.0493045	13.4588	1	0	0	0	1	1	0	0
68	2022		0	0	1.09861	1	0	8.05971	22.184	0.556668	-0.0562238	0	0.107771	0.440465	0.574662	0.00100123	0.0459548	13.9108	1	0	0	0	1	1	0	0
69	2013	N	0	0	0	0	0	9.66468	25.1992	0.949366	0.0616141	0.2792	0.529893	0.597735	0.285008	0.000619825	0.163456	14.2855	1	0	0	0	1	0	0	1
69	2014	N	0	0	0	0	0.693147	9.71276	25.2758	0.888765	0.0611842	0.2476	0.56965	0.599467	0.499327	0.000610197	0.164633	14.3041	1	0	0	0	1	0	0	1
69	2015	N	0	0	0	0	0	9.7737	25.4705	0.923567	0.0499028	0.2298	0.531888	0.626447	0.706165	0.00067127	0.13026	14.3461	1	0	0	0	1	0	0	1
69	2016	N	0	0	0	0	0.693147	9.87701	25.7092	0.956519	0.0558917	0.1705	0.532583	0.645737	0.532342	0.00056014	0.0997924	14.3461	1	0	0	0	1	0	0	1
69	2017	N	0	0	0	0	0.693147	10.0617	26.1053	0.985776	0.0512273	0.0856	0.502523	0.641982	0.595395	0.000526626	0.0646419	14.5574	1	0	0	0	1	0	0	1
69	2018	K	0	0	0	0	0	10.181	26.4074	1.06817	0.0441503	0.1129	0.603492	0.57796	0.511024	0.000498966	0.0494726	14.771	1	0	0	0	1	0	0	1
69	2019	K	0	0	0.693147	0	0	10.3757	26.6624	1.07535	0.0425723	0.1131	0.565828	0.577825	0.56337	0.000462297	0.0418791	14.771	1	0	0	0	1	0	0	1
69	2020	K	0	0	1.09861	1	0	10.6455	26.847	1.10915	0.0376053	0.1181	0.498642	0.575368	0.529402	0.000344968	0.0406868	14.771	1	0	0	0	1	0	0	1
69	2021	K	0	0	0.693147	0	0	10.8226	26.8972	1.12736	0.0152711	0.0771	0.261453	0.572946	0.573365	0.000292569	0.0453753	14.771	1	0	0	0	1	0	0	1
69	2022	K	0	0	1.38629	1	0.693147	10.5324	26.6969	1.14236	-0.0292496	0.0771	0.228359	0.575351	0.542763	0.000383856	0.0602308	14.771	1	0	0	0	1	0	0	1
70	2012	C38	0	0	0	0	0	8.16132	21.4122	0.755585	0.028659	0.104	0.174542	0.561688	1.04856	0.000763997	0.16821	13.039	1	1	0	0	1	1	0	0
70	2013	C38	0	0	0	0	0.693147	8.05923	21.5357	0.617412	0.0303415	0.0664	0.189212	0.525076	1.066	0.000774253	0.188218	13.039	1	1	0	0	1	1	0	0
70	2015	C38	0	0	0	0	0.693147	8.37748	22.1007	0.357148	-0.0867123	0.0347	0.161105	0.475175	0.710522	0.000752191	0.134115	13.1993	1	1	0	0	1	1	0	0
70	2016	C38	0	0	0	0	0	8.95277	22.2849	0.464179	0.0314583	0.0317	0.153163	0.475175	0.731167	0.0006865	0.122793	13.3847	1	1	0	0	1	1	0	0
70	2017	C38	0	0	0	0	0.693147	9.11787	22.4902	0.626897	0.0454478	0.0228	0.156126	0.475175	0.793411	0.000636615	0.0982713	13.3847	1	1	0	0	1	1	0	0
70	2018	C38	0	0	0	0	0.693147	9.12168	22.7	0.770251	0.0461357	0.0316	0.160923	0.475175	0.831246	0.000185366	0.0965282	13.7321	1	1	0	0	1	1	0	0
70	2019	C38	0	0	0	0	1.60944	8.91284	22.6819	0.549947	0.0513406	0.0299	0.197676	0.405045	0.862216	0.000297432	0.0821956	13.4298	1	1	0	0	1	1	0	0
70	2020	C38	0	0	0.693147	0	1.38629	9.03458	23.0344	0.694954	0.00678995	0.0298	0.186751	0.402766	0.930921	0.000298556	0.0558568	13.5008	1	1	0	0	1	1	0	0
70	2021	C38	0	0	2.3979	1	1.09861	9.03765	22.8424	0.742016	-0.0654211	0.0053	0.114139	0.409404	1.32348	0.000293909	0.0615799	13.9978	1	1	0	0	1	1	0	0
70	2022		0	0	1.94591	1	1.09861	8.70391	22.7867	0.69653	0.00665603	0	0.159212	0.411855	1.02715	0.000389489	0.145216	13.9978	1	1	0	0	1	1	0	0
78	2012	F	0	0	0	0	0	9.3695	22.492	0.68179	0.0188958	0.1933	0.151146	0.281396	0.837938	0.000461735	0.0736267	13.9978	0	0	0	0	1	0	0	1
78	2013	F	0	0	0	0	0	9.4941	22.8051	0.712356	0.0330357	0.1724	0.151436	0.354864	0.943031	0.000425694	0.0730247	13.9978	0	0	0	0	1	0	0	1
78	2014	F	0	0	0	0	2.07944	9.65232	22.9883	0.642498	0.00947574	0.1724	0.145947	0.258982	0.891022	0.000400274	0.0702238	14.0779	0	0	0	0	1	0	0	1
78	2015	F	0	0	0	0	1.38629	9.90339	23.2698	0.453022	0.046306	1.4337	0.146455	0.277544	0.968772	0.000420343	0.0357213	14.0779	0	0	0	0	1	0	0	1
78	2016	F	0	0	0	0	0	10.0623	23.5364	0.688884	0.0339077	0.6229	0.148733	0.470152	1.2082	0.000336564	0.0292238	14.0779	0	0	0	0	1	0	0	1
78	2017	F	0	0	0.693147	0	0	10.4903	24.1529	0.827912	0.0346671	0.6233	0.144168	0.484299	0.95678	0.000266243	0.0241803	14.221	0	0	0	0	1	0	0	1
78	2018	F	0	0	1.09861	1	0.693147	10.8407	24.4399	0.987725	0.0202836	0.6233	0.131336	0.480512	0.970761	0.00030602	0.022027	14.4033	0	0	0	0	1	0	0	1
78	2019	F	0	0	0	0	0	10.8951	24.4409	0.94646	0.0125136	1.069	0.133055	0.461471	0.969175	0.000290003	0.0240991	14.604	0	0	0	0	1	0	0	1
78	2020	F	0	0	0	0	1.09861	10.8452	24.4051	0.921703	-0.00102086	1.0736	0.116116	0.454986	0.932634	0.000265654	0.0269706	14.604	0	0	0	0	1	0	0	1
78	2021	F	0	0	1.09861	1	1.38629	10.8499	24.3504	0.942622	0.00666976	1.0736	0.10713	0.459826	0.934883	0.000286839	0.0315737	14.604	0	0	0	0	1	0	0	1
78	2022		0.693147	1	0	0	1.60944	10.774	24.3138	0.926448	-0.0268666	0.7173	0.100168	0.459722	0.920441	0.000307218	0.0318378	14.604	0	0	0	0	1	0	0	1
88	2012	G	0	0	0	0	0.693147	6.82894	22.3896	0.640571	0.0829534	0.005	0.589725	0.694667	6.70848	0.00189211	0.0360436	12.7657	1	0	0	0	1	0	0	1
88	2013	G	0	0	0	0	0.693147	6.82278	22.4437	0.456823	0.0780796	0.005	0.589202	0.678556	6.03038	0.00159607	0.0316054	12.409	1	0	0	0	1	0	0	1
88	2014	G	0	0	0	0	0.693147	6.81816	22.644	0.333409	0.0762842	0.0037	0.55819	0.690953	12.4091	0.00179578	0.0242172	12.409	1	0	0	0	1	0	0	1
88	2015	G	0	0	0	0	0.693147	6.63741	22.7874	0.424767	0.0710878	0.0037	0.499951	0.715341	3.22688	0.00273076	0.0202284	12.5425	1	0	0	0	1	0	0	1
88	2017	G	0	0	0	0	0.693147	6.59104	22.9529	0.543078	0.0493194	0	0.453631	0.715341	2.91081	0.00274604	0.055555	12.5425	1	0	0	0	1	0	0	1
88	2018	G	0	0	0	0	0.693147	6.3707	23.0564	0.839782	0.0495527	0	0.564122	0.715341	2.2432	0.00253786	0.180984	12.7657	1	0	0	0	1	0	0	1
88	2019	G	0	0	0	0	0.693147	6.71157	23.1227	0.80001	0.0369897	0	0.426919	0.715341	1.58771	0.00174336	0.193257	12.6115	1	0	0	0	1	0	0	1
88	2020	G	0	0	0	0	0.693147	6.45888	23.2967	0.749938	0.0317674	0	0.299742	0.716547	2.26462	0.00204473	0.262346	13.4298	1	0	0	0	1	0	0	1
88	2021	G	0	0	0	0	1.09861	6.69528	23.3588	0.890533	0.0357593	0	0.383868	0.693915	1.68912	0.00186651	0.255665	13.4898	1	0	0	0	1	0	0	1
88	2022		0	0	0	0	1.09861	6.82963	23.5203	0.967607	0.0319842	0.0016	0.341324	0.693736	2.93493	0.00132099	0.23301	13.3786	1	0	0	0	1	0	0	1
89	2012	G	0	0	0	0	0.693147	7.92917	23.0653	1.08806	0.0599513	0.0035	0.410517	0.628934	2.0035	0.000323317	0.221735	13.3375	1	0	0	0	1	0	1	0
89	2013	G	0	0	0	0	1.79176	7.55157	23.1965	1.04288	0.0457285	0.0035	0.340362	0.639781	0.791722	0.000329659	0.774315	13.3847	1	0	0	0	1	0	1	0
89	2014	G	0	0	0	0	1.09861	7.73494	23.2647	0.870468	0.0224928	0.0056	0.208194	0.630138	0.865746	0.000291985	0.648526	13.3847	1	0	0	0	1	0	1	0
89	2015	G	0	0	0	0	1.79176	7.73983	23.2044	0.648518	0.0432359	0	0.302613	0.589551	1.27362	0.000196531	0.659741	13.4588	1	0	0	0	1	0	1	0
89	2016	G	0	0	0	0	1.60944	7.7733	23.2474	0.686994	0.0470604	0	0.272644	0.61464	1.67153	0.00027808	0.613035	13.4588	1	0	0	0	1	0	1	0
89	2017	G	0	0	0	0	0.693147	7.86821	23.2972	0.664534	0.052743	0	0.288779	0.633438	2.00688	0.000275209	0.563876	13.4588	1	0	0	0	1	0	1	0
89	2018	G	0	0	0.693147	0	1.94591	7.93633	23.3225	0.757016	0.0513211	0	0.258848	0.619136	2.22645	0.000288141	0.563256	13.4588	1	0	0	0	1	0	1	0
89	2019	G	0	0	1.09861	1	1.60944	8.00199	23.3639	0.63797	0.0440832	0	0.237155	0.651127	1.69916	0.000303425	0.52679	13.4444	1	0	0	0	1	0	1	0
89	2020	G	0	0	0.693147	0	1.60944	7.76777	23.4391	0.758423	0.00264056	0	0.0638052	0.633112	0.684953	0.000453963	0.492451	13.4444	1	0	0	0	1	0	1	0
89	2021	G	0	0	1.09861	1	1.60944	7.69279	23.994	0.894396	-0.00096944	0.0018	0.0832937	0.612242	1.10655	0.000422726	0.526022	13.4444	1	0	0	0	1	0	1	0
89	2022	G	0	0	0.693147	0	1.60944	7.48999	23.9472	0.822476	-0.0438516	0.0018	-0.351787	0.617108	0.626915	0.000511137	0.527444	13.4444	1	0	0	0	1	0	1	0
90	2012	E	0	0	0	0	0	9.02356	22.8725	0.935529	0.0311153	0.0011	0.223192	0.384769	0.400603	0.000439747	0.0171417	13.3047	1	0	0	0	1	0	0	1
90	2013	E	0	0	0	0	0	9.26337	23.0048	0.966255	0.0412005	0	0.23864	0.379755	0.519547	0.000294453	0.0244591	13.3047	1	0	0	0	1	0	0	1
90	2014	E	0	0	0	0	0	9.47816	23.1236	0.737339	0.0404925	0	0.201208	0.430765	0.501787	0.000269351	0.0173167	13.5924	1	0	0	0	1	0	0	1
90	2015	E	0	0	0	0	0	9.67146	23.5299	0.753986	0.028453	0.0001	0.211352	0.444042	0.613133	0.00024365	0.0105145	13.5924	1	0	0	0	1	0	0	1
90	2016	E	0	0	0	0	0	9.50339	23.6829	0.850878	0.0248931	0.0001	0.22181	0.444042	0.493272	0.000264312	0.0128611	13.8643	1	0	0	0	1	0	0	1
90	2017	E	0.693147	1	0	0	0.693147	9.48198	23.9734	0.880177	0.0265388	0.0001	0.260775	0.444042	0.375752	0.000331427	0.0121492	13.8643	1	0	0	0	1	0	0	1
90	2018	E	0.693147	1	0.693147	0	0	9.87253	24.1809	1.07178	0.0269539	0.0083	0.216489	0.444042	0.457449	0.000273396	0.00983318	13.8155	1	0	0	0	1	0	0	1
90	2019	E	0.693147	1	0.693147	0	0	10.1315	24.4199	0.994015	0.0342419	0.0091	0.233881	0.430612	0.353632	0.000242912	0.0101024	13.8155	1	0	0	0	1	0	0	1
90	2020	E	0	0	0	0	0	10.2184	24.6151	0.998739	0.0333391	0.0183	0.238188	0.427942	0.583804	0.000203161	0.00988424	13.9108	1	0	0	0	1	0	0	1
90	2021	E	0	0	0	0	0	10.5022	24.8147	1.03205	0.0358684	0.0142	0.197403	0.427942	0.606783	0.000188913	0.0084094	14.152	1	0	0	0	1	0	0	1
90	2022	E	0	0	0	0	0	10.6203	24.9604	1.05948	0.0305459	0.0056	0.20352	0.417887	0.64645	0.000192125	0.00705102	14.152	1	0	0	0	1	0	0	1
96	2012	F	0	0	0	0	0	8.21799	21.4114	0.902292	0.0105622	0	0.0683983	0.621232	4.45006	0.000384457	0.0424704	13.5278	1	0	0	0	1	0	0	1
96	2013	F	0	0	0	0	0	8.1301	21.4403	0.695785	0.0338385	0	0.083576	0.611732	5.79623	0.000472743	0.038787	13.5278	1	0	0	0	1	0	0	1
96	2014	F	0	0	0	0	0	8.24847	21.4328	0.478327	0.0213671	0	0.104986	0.641795	8.40297	0.000483684	0.042858	13.5278	1	0	0	0	1	0	0	1
96	2015	F	0	0	0	0	0	8.27491	21.5194	0.245811	0.0702868	0	0.138758	0.575424	7.5092	0.000499147	0.0346822	13.5278	1	0	0	0	1	0	0	1
96	2016	F	0	0	0	0	0	8.1895	21.6111	0.313097	0.127754	0	0.187946	0.591532	13.1447	0.000521015	0.0301679	13.5278	1	0	0	0	1	0	0	1
96	2017	F	0	0	0	0	0	8.52064	21.6606	0.365634	0.0622038	0	0.1383	0.597417	11.3326	0.000381117	0.02717	13.5278	1	0	0	0	1	0	0	1
96	2018	F	0	0	0	0	0	8.79127	21.6967	0.534283	0.0429647	0	0.0917043	0.612148	11.9388	0.000284312	0.0274749	13.5278	1	0	0	0	1	0	0	1
96	2019	F	0	0	0	0	0	8.8527	21.804	0.48125	0.0461184	0	0.105623	0.635436	10.7348	0.000286411	0.0187423	13.1224	1	0	0	0	1	0	0	1
96	2020	F	0	0	1.09861	1	0	8.62706	21.847	0.584933	0.0441848	0	0.105313	0.631629	11.2024	0.000381099	0.015735	13.1224	1	0	0	0	1	0	0	1
96	2021	F	0	0	1.09861	1	0	8.92375	21.8495	0.645842	0.0228859	0	0.101104	0.631629	16.0233	0.000329546	0.0150332	13.6292	1	0	0	0	1	0	0	1
96	2022	F	0	0	0	0	0	9.20938	21.7355	0.635199	0.0201175	0	0.0845286	0.631629	16.0498	0.000250585	0.0154987	13.6292	1	0	0	0	1	0	0	1
99	2012	G	0	0	0	0	0	7.34574	21.9849	0.644083	0.0464832	0	0.301147	0.476412	2.80662	0.000837953	0.521031	13.1224	1	0	0	0	1	0	1	0
99	2013	G	0	0	0	0	0	7.33957	22.0687	0.620018	0.0527893	0	0.261005	0.437705	1.22272	0.000980647	0.639281	13.1224	1	0	0	0	1	0	1	0
99	2014	G	0	0	0	0	1.09861	7.42896	22.2172	0.442579	0.0496102	0	0.291267	0.440333	1.56669	0.000921666	0.599551	13.1224	1	0	0	0	1	0	1	0
99	2015	G	0	0	0	0	1.09861	7.33484	22.325	0.44679	0.0368456	0	0.333389	0.418553	1.35329	0.000943816	0.665419	13.1224	1	0	0	0	1	0	1	0
99	2016	G	0	0	0	0	0		22.3111	0.536879	0.0182037	0.0001	0.191533	0.424836	1.25584	0.000861978	0.641572	13.1224	1	0	0	0	1	0	1	0
99	2017	G	0	0	0	0	0	7.34749	22.4499	0.700515	0.0181802	0.0001	0.198009	0.427703	1.69007	0.000998148	0.523902	13.7101	1	0	0	0	1	0	1	0
99	2018	G	0	0	0	0	0	7.48269	22.4573	0.963362	0.0282063	0.0001	0.238596	0.427703	1.93785	0.000993235	0.487382	13.7101	1	0	0	0	1	0	1	0
99	2019	G	0	0	0	0	0	7.63291	22.4917	0.843471	0.036638	0.0001	0.256296	0.432155	1.40753	0.000794355	0.396082	13.7101	1	0	0	0	1	0	1	0
99	2020	G	0	0	0	0	1.09861	7.63694	22.4303	0.856257	0.0375524	0.0001	0.290001	0.429664	2.85692	0.000899103	0.41177	13.9108	1	0	0	0	1	0	1	0
99	2021	G	0	0	0	0	1.60944	7.72575	22.6129	0.828075	0.0410175	0.0001	0.265169	0.435871	4.39663	0.000397119	0.322841	13.8155	1	0	0	0	1	0	1	0
99	2022	G	0	0	0	0	1.38629	7.78437	22.5895	0.930619	0.0259883	0	0.202528	0.411237	3.97534	0.000669556	0.338635	13.8155	1	0	0	0	1	0	1	0
100	2012	C39	1.60944	1	0	0	2.07944	10.3262	25.1021	1.01997	0.0165546	5.9299	0.163292	0.174922	0.866881	0.000552747	0.267547	14.9787		1	0	0	1	1	0	0
100	2013	C39	1.38629	1	0	0	2.30259	10.5457	25.081	1.00097	0.0365554	6.2091	0.175393	0.174011	0.962188	0.00058562	0.260771	15.0597		1	0	0	1	1	0	0
100	2014	C39	1.09861	1	0	0	3.66356	10.7122	25.2545	0.92256	0.0495179	6.9145	0.175669	0.167287	0.959998	0.00060269	0.218043	15.0825		1	0	0	1	1	0	0
100	2015	C39	1.38629	1	0	0	3.61092	10.769	25.4396	0.913055	0.031569	5.2854	0.165392	0.163649	0.828584	0.000649553	0.233029	15.1075		1	0	0	1	1	0	0
100	2016	C39	1.09861	1	0	0	3.4012	10.5845	25.7146	1.02802	0.016513	5.2917	0.169088	0.174262	0.937649	0.000797601	0.256364	15.1102		1	0	0	1	1	0	0
100	2017	C39	0	0	3.04452	1	3.46574	10.6731	25.8003	1.006	0.0230602	4.7822	0.20536	0.190644	0.929435	0.000847487	0.203364	15.1713		1	0	0	1	1	0	0
100	2018	C39	0	0	2.30259	1	2.99573	10.6722	25.9847	1.14185	0.0230285	4.7887	0.183085	0.19065	0.766405	0.000379288	0.186669	15.2142		1	0	0	1	1	0	0
100	2019	C39	0	0	0	0	2.19722	10.2558	25.8283	1.01975	0.0204566	6.0129	0.114715	0.194129	0.986524	0.000252904	0.275769	14.9661		1	0	0	1	1	0	0
100	2020	C39	0	0	0	0	1.94591	10.1743	26.2759	0.968552	0.0239629	5.815	0.136089	0.172869	0.800567	0.000309137	0.359934	15.074		1	0	0	1	1	0	0
100	2021	C39	0	0	0	0	0	10.8838	26.4557	1.11416	0.0527987	5.8169	0.198617	0.175351	0.904938	0.000268638	0.367888	15.1625		1	0	0	1	1	0	0
100	2022	C39	0	0	0	0	1.60944	10.8772	26.6094	1.17987	0.00534763	4.7831	0.0878238	0.132951	0.88521	0.000212582	0.367997	15.1542		1	0	0	1	1	0	0
151	2012	F	0	0	0	0	0	8.81867	21.2336	0.622256	0.030937	0	0.103292	0.505511	1.52025	0.000268265	0.0490695	13.2177	1	0	0	0	1	0	0	1
151	2013	F	0	0	0	0	0	8.75528	21.6355	0.700645	0.0445392	0	0.161362	0.509408	1.44108	0.000405658	0.0327492	13.2177	1	0	0	0	1	0	0	1
151	2014	F	0	0	0	0	0	9.4414	21.7947	0.413407	0.0416647	0	0.123354	0.494486	1.33977	0.000324969	0.0127841	13.2177	1	0	0	0	1	0	0	1
151	2015	F	0	0	0	0	0	8.664	21.6052	0.301368	0.0503511	0	0.19472	0.46307	1.50389	0.000542698	0.0162763	13.2177	1	0	0	0	1	0	0	1
151	2016	F	0	0	0	0	0	9.08405	21.4502	0.323669	0.0449939	0	0.116183	0.460976	1.58519	0.000434406	0.0160306	13.2177	1	0	0	0	1	0	0	1
151	2017	F	0	0	0	0	0	9.13057	21.4919	0.474439	0.0418579	0.0017	0.137902	0.460976	1.33198	0.000431586	0.0295149	13.2177	1	0	0	0	1	0	0	1
151	2018	F	0	0	0	0	0	8.58832	21.4923	0.54128	0.038671	0	0.164179	0.461148	0.911669	0.000690001	0.0278183	13.2177	1	0	0	0	1	0	0	1
151	2019	F	0	0	0	0	0	8.53741	21.5956	0.551599	0.00384654	0	0.274033	0.469999	0.728237	0.000576952	0.0241767	13.2177	1	0	0	0	1	0	0	1
151	2020	F	0	0	0	0	0	8.16455	21.3138	0.531212	-0.138514	0	0.0386917	0.46875	0.906807	0.00148421	0.0283865	13.1224	1	0	0	0	1	0	0	1
151	2021	F	0.693147	1	0	0	0	8.97515	22.0243	0.764324	0.0236909	0	0.162652	0.520623	1.10127	0.000912781	0.0177602	13.4588	1	0	0	0	1	0	0	1
151	2022		0	0	0	0	0	9.6618	22.2383	0.651814	-0.114113	0	0.0615851	0.520623	1.10298	0.000409112	0.0135764	13.4588	1	0	0	0	1	0	0	1
153	2012	C27	0	0	0	0	0	7.93988	21.0952	0.642098	0.0130687	0	0.229785	0.332202	0.686438	0.000726991	0.360072	13.3047	0	1	0	1	0	1	0	0
153	2013	C27	0	0	0	0	0	7.81423	21.4069	0.658714	0.0158464	0	0.260568	0.179427	1.08264	0.000808405	0.319127	13.3047	0	1	0	1	0	1	0	0
153	2014	C27	0	0	0	0	0	7.93541	21.5286	0.465076	0.0194933	0	0.265003	0.22253	0.739468	0.000858714	0.273039	13.3047	0	1	0	1	0	1	0	0
153	2016	C27	0	0	0	0	0	8.02437	21.6357	0.464657	0.0190636	0	0.266128	0.255175	0.724094	0.000792372	0.338858	13.3847	0	1	0	1	0	1	0	0
153	2017	C27	0	0	0	0	0	8.2775	21.7413	0.68599	0.0248562	0.3221	0.305994	0.251202	0.734193	0.000691586	0.289089	13.3847	0	1	0	1	0	1	0	0
153	2018	C27	0	0	0	0	0	8.44449	21.8245	0.899609	0.0210216	0	0.389499	0.251202	0.687311	0.000462516	0.252264	13.5924	0	1	0	1	0	1	0	0
153	2019	C27	0	0	0	0	0	8.53473	21.9929	0.828711	0.0245475	0	0.38155	0.255175	0.615518	0.000452443	0.201525	13.5924	0	1	0	1	0	1	0	0
153	2020	C27	0	0	0	0	0	8.58025	22.0142	0.736911	0.0283766	0	0.346629	0.255175	0.586457	0.000410632	0.185682	13.5924	0	1	0	1	0	1	0	0
153	2021	C27	0	0	0	0	0.693147	8.62117	22.0626	0.63638	0.0293777	0	0.301077	0.24571	0.585935	0.000422423	0.184683	13.5924	0	1	0	1	0	1	0	0
153	2022	C27	0	0	0	0	0	8.65809	22.2205	0.633821	0.0364346	1.5627	0.282284	0.230935	0.587833	0.000416576	0.218538	13.5924	0	1	0	1	0	1	0	0
155	2012	C26	0	0	0	0	0	7.91255	21.8722	0.885617	0.000496158	0	0.186287	0.667778	0.420974	0.00164985	0.450598	12.6761	1	1	1	0	0	0	1	0
155	2013	C26	0	0	0	0	0	7.79682	21.7994	0.799968	-0.233908	0	0.0602119	0.632031	0.450904	0.00207375	0.44819	13.1224	1	1	1	0	0	0	1	0
155	2014	C26	0	0	0	0	0	7.40697	21.0233	0.245934	-0.768914	0	0.00333787	0.62463	0.188483	0.0053183	0.370475	13.2085	1	1	1	0	0	0	1	0
155	2015	C26	0	0	0	0	0	6.81674	20.3945	0.107131	-0.686623	0	0.0746365	0.427814	0.125523	0.00641326	0.197732	13.1224	1	1	1	0	0	0	1	0
155	2017	C26	0	0	0	0	1.60944	9.20931	22.638	0.697809	0.078444	0	0.0581515	0.417212	2.38828	0.000103545	0.382715	13.3847	1	1	1	0	0	0	1	0
155	2018	C26	0	0	0	0	1.09861	8.72674	22.7014	0.925935	0.0586449	0	0.119166	0.416021	2.77982	0.000131218	0.424724	13.1993	1	1	1	0	0	0	1	0
155	2019	D	0	0	0	0	0	8.002	22.7037	0.850172	0.0455176	0	0.270365	0.416021	3.06744	0.000345885	0.399102	13.1993	1	0	1	0	0	0	1	0
155	2020	D	0	0	1.09861	1	0.693147	7.81951	22.9462	0.606515	0.0356386	0	0.31209	0.416021	2.54828	0.000434555	0.517982	13.3847	1	0	1	0	0	0	1	0
155	2021	D	0	0	0	0	1.38629	8.28419	23.5745	0.387829	0.0506327	0	0.332745	0.488161	1.68561	0.000516387	0.34066	13.5144	1	0	1	0	0	0	1	0
155	2022	D	0	0	0.693147	0	1.60944	8.12077	23.6859	0.556442	0.0700693	0	0.543151	0.494253	1.50532	0.000720184	0.329169	13.567	1	0	1	0	0	0	1	0
156	2012	R	1.09861	1	0	0	1.79176	7.59545	21.9422	0.845709	0.0947057	0	0.427201	0.787534	0.433353	0.0012775	0.42001	13.5924	0	0	0	0	1	0	1	0
156	2013	R	1.09861	1	0	0	2.19722	7.64504	22.3495	0.792115	0.0603312	0	0.441498	0.694961	0.55889	0.00124792	0.412349	13.9978	0	0	0	0	1	0	1	0
156	2015	R	1.38629	1	0	0	1.94591	8.06875	23.2629	0.468057	0.0584183	0	0.442464	0.687598	3.43303	0.0011748	0.182802	14.0779	1	0	0	0	1	0	1	0
156	2016	R	1.38629	1	0	0	2.19722	8.1216	23.3647	0.565439	0.0449764	0	0.448911	0.68684	3.2246	0.00117513	0.175606	14.0779	1	0	0	0	1	0	1	0
156	2017	R	1.09861	1	0.693147	0	1.60944	8.14072	23.3919	0.777199	0.0450702	0	0.446559	0.650655	3.19565	0.00129104	0.184356	14.4033	1	0	0	0	1	0	1	0
156	2018	R	0.693147	1	1.38629	1	2.30259	8.19027	23.4139	0.958161	0.0441809	0	0.406947	0.650655	3.22826	0.000838243	0.192652	14.1871	1	0	0	0	1	0	1	0
156	2019	R	0.693147	1	0.693147	0	2.83321	8.24496	23.4784	0.816298	0.0423792	0	0.370276	0.650655	2.9045	0.000817659	0.193864	14.0387	1	0	0	0	1	0	1	0
156	2020	R	0.693147	1	2.19722	1	2.83321	8.57505	23.8777	0.945043	0.0486013	0	0.325933	0.537163	1.41401	0.00103394	0.342851	14.0387	1	0	0	0	1	0	1	0
156	2021	R	0.693147	1	0.693147	0	2.63906	8.67684	23.9659	0.969345	0.0377952	0	0.321285	0.537001	1.34045	0.000961902	0.335073	14.3388	1	0	0	0	1	0	1	0
156	2022		0	0	1.60944	1	2.89037	8.76219	24.0232	1.03424	0.0306279	0	0.312229	0.535463	1.02927	0.000953543	0.332005	14.4574	1	0	0	0	1	0	1	0
157	2012	C35	1.09861	1	0	0	0	10.4885	25.2116	0.785832	0.093786	0.0317	0.32297	0.39731	1.59055	0.000402668	0.0513559	14.7238		1	0	1	0	1	0	0
157	2013	C35	1.09861	1	0	0	0	10.2379	25.2179	1.00049	0.0442759	0.2498	0.291675	0.398084	1.84061	0.000506839	0.0600516	14.8802		1	0	1	0	1	0	0
157	2014	C35	1.09861	1	0	0	0	9.83458	25.264	0.897659	0.00685097	0.2428	0.278888	0.398067	2.52176	0.00074651	0.064707	14.7116		1	0	1	0	1	0	0
157	2015	C35	1.38629	1	0	0	1.60944	9.54868	25.2636	0.996576	0.000972444	0.1802	0.270192	0.394764	2.00453	0.000819574	0.0832243	14.7116		1	0	1	0	1	0	0
157	2016	C35	1.38629	1	0	0	1.38629	9.55147	25.2135	1.02828	-0.00989597	0.1963	0.238623	0.394751	2.08741	0.000866019	0.0835859	14.6528		1	0	1	0	1	0	0
157	2017	C35	1.09861	1	0	0	1.38629	9.78372	25.1439	1.03364	0.014487	0.5897	0.2135	0.388189	2.17228	0.000760012	0.0706089	14.6484		1	0	1	0	1	0	0
157	2018	C35	1.09861	1	1.94591	1	2.19722	10.0027	25.2608	1.10439	0.0221582	0.429	0.270885	0.387448	1.53472	0.000508517	0.0581952	14.6484		1	0	1	0	1	0	0
157	2019	C35	1.09861	1	2.07944	1	2.56495	10.3706	25.2458	0.897492	0.0460868	0.4161	0.300013	0.414261	1.48657	0.000373978	0.0630249	14.7437		1	0	1	0	1	0	0
157	2020	C35	1.09861	1	1.94591	1	2.89037	10.7403	25.4792	0.821904	0.070607	0.5026	0.285927	0.418386	1.41844	0.000300295	0.0525411	14.6993		1	0	1	0	1	0	0
157	2021	C35	1.38629	1	1.60944	1	3.09104	10.73	25.5274	0.974482	0.0535981	0.4195	0.236115	0.404996	1.52504	0.000249288	0.0555044	14.6993		1	0	1	0	1	0	0
157	2022	C35	1.38629	1	1.94591	1	2.56495	10.1308	25.5399	1.06882	0.0194212	0.4195	0.218307	0.404945	1.22714	0.000378109	0.0843238	14.9141		1	0	1	0	1	0	0
158	2012	C17	0	0	0	0	0.693147	8.61803	22.4667	0.998378	0.00212578	0.0001	0.0509934	0.492217	0.742819	0.00034855	0.291629	13.2177	1	0	0	0	1	0	0	1
158	2013	C17	0	0	0	0	0.693147	8.84533	22.4765	0.915384	0.00305352	0.0001	0.0346833	0.497294	0.594287	0.000481907	0.260003	13.2177	1	0	0	0	1	0	0	1
158	2014	C17	0	0	0	0	0.693147	9.07826	22.4376	0.556805	0.00428447	0.0003	0.0119528	0.498864	0.445108	0.000325909	0.209357	13.2177	1	0	0	0	1	0	0	1
158	2015	C17	0	0	0	0	2.89037	9.35033	23.1159	0.486325	0.0301572	2.3185	0.0684114	0.473806	0.774671	0.000331309	0.118979	13.5924	1	0	0	0	1	0	0	1
158	2016	C17	0	0	0	0	2.83321	9.54466	23.273	0.676861	0.0292255	2.3174	0.0759954	0.473806	0.982375	0.000267088	0.106188	13.5924	1	0	0	0	1	0	0	1
158	2017	C17	0	0	1.09861	1	2.3979	9.53819	23.2719	0.74546	0.0277445	2.3142	0.0725557	0.474546	0.975863	0.000300602	0.1258	13.7101	1	0	0	0	1	0	0	1
158	2018	C17	0	0	3.29584	1	2.3979	9.29001	23.3725	0.850217	0.013585	2.5869	0.0923723	0.484883	0.975693	0.000303225	0.157533	13.8155	1	0	0	0	1	0	0	1
158	2019	I	0	0	3.85015	1	2.48491	9.24204	23.3734	0.74316	0.00672876	2.0962	0.0854064	0.457728	0.865721	0.000309536	0.172303	13.8155	1	1	0	0	1	1	0	0
158	2020	I	0	0	3.43399	1	3.21888	9.28201	23.4243	0.796192	0.00737368	1.7995	0.0991539	0.434414	1.04444	0.000290834	0.167726	13.8155	1	1	0	0	1	1	0	0
158	2021	I	0	0	2.48491	1	3.4012	9.37912	23.5325	0.774785	0.00823842	1.5313	0.105907	0.415707	0.854762	0.000306091	0.149354	13.9108	1	1	0	0	1	1	0	0
158	2022	I	0	0	3.66356	1	3.73767	9.34342	23.5301	0.846254	-0.0140262	1.1952	0.0947177	0.416814	0.880922	0.000338405	0.1168	13.9108	1	1	0	0	1	1	0	0
159	2012	F	0	0	0	0	0	8.18487	21.8175	0.74726	0.0328522	0	0.139679	0.311059	1.41151	0.000384398	0.0975684	13.017	0	0	1	0	0	0	0	1
159	2013	F	0	0	0	0	0	7.94979	21.8162	0.678587	0.0117594	0	0.225127	0.31214	1.65472	0.000585684	0.0853506	13.1224	0	0	1	0	0	0	0	1
159	2014	F	0	0	0	0	0	8.04678	21.8112	0.522744	0.0445549	0	0.109143	0.316429	1.97702	0.000776083	0.0817213	13.1224	0	0	1	0	0	0	0	1
159	2015	F	0	0	0	0	0	7.52073	21.8047	0.562551	0.0203047	0.0421	0.221708	0.308155	1.73887	0.00127521	0.078644	13.1224	0	0	1	0	0	0	0	1
159	2016	F	0	0	0	0	0	7.11692	21.8599	0.623012	0.0118265	0.0159	0.173172	0.314562	1.3842	0.00147685	0.1286	13.1224	0	0	1	0	0	0	0	1
159	2017	F	0	0	0	0	0	6.79088	21.8344	0.873267	-0.0231167	0.0097	0.114508	0.305034	1.26902	0.00192089	0.118552	13.1224	0	0	1	0	0	0	0	1
159	2018	F	0	0	0	0	0	7.26584	21.7312	1.04224	0.0172496	0.0097	0.206606	0.30353	1.36096	0.00153232	0.12664	13.1224	0	0	1	0	0	0	0	1
159	2019	F	0	0	0	0	0	7.03721	21.759	0.836457	0.00937925	0.0097	0.082201	0.275668	1.35152	0.00146006	0.118756	13.1224	0	0	1	0	0	0	0	1
159	2020	F	0	0	0	0	0	7.36188	21.7089	0.909347	0.0309287	0.0097	0.144201	0.248104	1.8594	0.0015792	0.10081	13.3047	0	0	1	0	0	0	0	1
159	2021	F	0	0	0	0	0.693147	7.93159	22.0286	0.808275	0.00794206	0.0097	0.090882	0.243947	0.517282	0.000625647	0.088915	13.3047	0	0	1	0	0	0	0	1
159	2022	F	0	0	0	0	0	8.29599	21.8474	0.807452	0.0929353	0.0047	0.0955285	0.291484	1.90141	0.000462411	0.101008	13.3047	0	0	1	0	0	0	0	1
301	2012	D	0	0	0	0	1.09861	7.73455	21.9994	0.770034	0.0451761	0	0.330018	0.383254	0.909353	0.000883339	0.0735977	13.3847	1	0	0	0	1	0	1	0
301	2013	D	0	0	0	0	1.60944	7.90924	22.0226	0.792741	0.0912094	0	0.409073	0.37748	1.84573	0.000989972	0.0693595	13.4588	1	0	0	0	1	0	1	0
301	2014	D	0	0	0	0	1.09861	7.65967	22.1063	0.562789	0.0587283	0	0.46973	0.373486	1.97294	0.00102365	0.0593536	13.4588	1	0	0	0	1	0	1	0
301	2015	D	0	0	0	0	2.19722	7.50518	22.2066	0.489895	0.0397566	0	0.492423	0.382997	1.51641	0.00109866	0.0591537	13.4588	1	0	0	0	1	0	1	0
301	2016	D	0	0	0	0	2.83321	7.37778	22.3262	0.619518	0.0314022	0	0.43795	0.37939	0.91336	0.00125508	0.127284	13.4588	1	0	0	0	1	0	1	0
301	2017	D	0.693147	1	0	0	1.79176	7.87452	22.2083	0.605306	0.0486006	0	0.313365	0.378252	3.93912	0.000862795	0.0869842	13.5278	1	0	0	0	1	0	1	0
301	2018	C28	0.693147	1	1.09861	1	2.07944	9.44971	23.8083	0.888884	0.0644183	0	0.138039	0.800511	0.630255	7.56254e-05	0.384662	14.6484	0	1	0	0	1	0	1	0
301	2019	C28	0.693147	1	0.693147	0	2.19722	9.59473	24.2798	0.954139	0.056655	0	0.121321	0.800511	0.571795	0.000102985	0.381094	14.691	0	1	0	0	1	0	1	0
301	2020	C28	0.693147	1	1.09861	1	1.09861	9.48034	24.8653	0.917179	0.00638391	0	0.0595428	0.708607	0.958839	0.000113929	0.218857	14.4033	0	1	0	0	1	0	1	0
301	2021	C28	0.693147	1	0.693147	0	0.693147	10.0343	25.6061	0.851829	0.0521837	0	0.16722	0.707096	0.475827	0.000124175	0.236258	14.604	0	1	0	0	1	0	1	0
301	2022	C28	1.09861	1	1.09861	1	0.693147	10.1603	25.8383	0.806377	0.00363599	0	0.0766606	0.638095	0.295033	0.000102187	0.239947	14.7901	0	1	0	0	1	0	1	0
333	2014	C38	0	0	0.693147	0	3.09104	10.7925	25.5132	0.763738	0.107222	4.8017	0.254104	0.448805	0.895046	0.000529283	0.162287	15.6073	0	1	0	0	1	1	0	0
333	2015	C38	0	0	1.38629	1	2.19722	10.8167	25.5819	0.744953	0.109376	3.5612	0.258438	0.451926	1.05981	0.000537539	0.145371	15.6073	0	1	0	0	1	1	0	0
333	2016	C38	0	0	1.09861	1	1.60944	10.8649	25.8626	0.612159	0.105943	2.1833	0.27306	0.396578	1.06209	0.000604913	0.123427	15.8143	0	1	0	0	1	1	0	0
333	2017	C38	0	0	2.77259	1	2.63906	11.0635	26.2371	0.477323	0.0888983	2.1648	0.250306	0.466643	1.07638	0.000614021	0.0910927	15.9788	0	1	0	0	1	1	0	0
333	2018	C38	0	0	2.3979	1	3.3673	11.1356	26.2981	0.63981	0.0846037	2.1566	0.275356	0.499526	1.08819	0.000368615	0.0850858	15.9788	0	1	0	0	1	1	0	0
333	2019	C38	0	0	2.56495	1	3.29584	11.2179	26.4335	0.508781	0.0893728	2.0224	0.288632	0.514566	1.19991	0.000342588	0.071748	16.0088	0	1	0	0	1	1	0	0
333	2020	C38	0	0	2.3979	1	3.91202	11.1906	26.6104	0.394548	0.0830589	1.7316	0.251148	0.487206	1.14351	0.000325948	0.06171	16.0075	0	1	0	0	1	1	0	0
333	2021	C38	0	0	2.56495	1	3.82864	11.3482	26.6841	0.510277	0.0775471	1.7517	0.224794	0.513026	0.817959	0.000300858	0.0589073	16.01	0	1	0	0	1	1	0	0
333	2022		0	0	2.48491	1	3.82864	11.2919	26.7696	0.672036	0.07356	1.7607	0.242438	0.543074	0.973703	0.000336786	0.0617268	16.01	0	1	0	0	1	1	0	0
338	2012	C36	0	0	0	0	0	10.1518	24.9178	0.89277	0.0505888	1.8342	0.194961	0.448351	1.32296	0.00067116	0.1738	16.2665	1	1	0	0	1	1	0	0
338	2013	C36	0	0	0	0	0	10.3479	25.0866	0.977865	0.0527144	1.719	0.206201	0.447589	1.34741	0.000661326	0.167459	16.2665	1	1	0	0	1	1	0	0
338	2014	C36	0	0	0	0	0.693147	10.458	25.5142	0.943788	0.0581551	1.594	0.214591	0.447605	1.07693	0.000804306	0.184528	16.2665	1	1	0	0	1	1	0	0
338	2015	C36	0	0	0	0	0	10.4086	25.4671	1.01432	0.0183834	1.5465	0.230057	0.447644	1.15153	0.000973118	0.206016	16.3492	1	1	0	0	1	1	0	0
338	2016	C36	0	0	0	0	0	10.6265	25.8231	1.01584	0.0257922	1.546	0.226258	0.447605	1.02263	0.000821141	0.157336	16.3492	1	1	0	0	1	1	0	0
338	2017	C36	0	0	0	0	1.09861	11.0713	25.9684	0.971414	0.0519096	1.6061	0.218393	0.447669	1.02569	0.000633478	0.142732	16.3492	1	1	0	0	1	1	0	0
338	2018	C36	0.693147	1	0	0	1.09861	11.1032	26.0476	1.00179	0.0588772	1.6618	0.223348	0.459358	0.986619	0.000393047	0.143485	16.0979	1	1	0	0	1	1	0	0
338	2019	C36	0.693147	1	0.693147	0	1.09861	11.2126	26.1906	0.887311	0.0538647	1.6757	0.217983	0.472418	0.958354	0.000395742	0.111128	15.9903	1	1	0	0	1	1	0	0
338	2020	C36	0.693147	1	1.79176	1	0	11.1414	26.3245	0.918609	0.0444257	1.5836	0.193115	0.524333	0.980407	0.000390394	0.117166	15.9903	1	1	0	0	1	1	0	0
338	2021	C36	0.693147	1	2.30259	1	1.38629	11.2973	26.3474	0.900059	0.0422125	1.3779	0.194554	0.433025	1.11848	0.000395779	0.119801	15.9903	1	1	0	0	1	1	0	0
338	2022	C36	0	0	2.48491	1	3.68888	11.128	26.4057	1.03102	0.0199144	1.2377	0.177822	0.433152	1.12834	0.000462002	0.129039	15.9903	1	1	0	0	1	1	0	0
400	2012	C38	0.693147	1	0	0	1.94591	9.12303	22.6585	0.616826	0.0813786	0.055	0.267618	0.298984	1.39387	0.000984101	0.150539	13.4588	1	1	0	1	0	1	0	0
400	2013	C38	0.693147	1	0	0	2.07944	9.21945	22.8384	0.472826	0.101229	0.05	0.268125	0.283444	1.40235	0.000806583	0.12098	13.4588	1	1	0	1	0	1	0	0
400	2014	C38	0.693147	1	0	0	2.07944	9.3516	23.1021	0.562522	0.135121	0.0174	0.343777	0.431585	1.9755	0.000939753	0.0953599	13.4588	1	1	0	1	0	1	0	0
400	2015	C38	0	0	0	0	1.60944	9.23441	23.248	0.573069	0.0692334	0.0244	0.27962	0.460225	1.85104	0.000768254	0.0794263	13.7101	1	1	0	1	0	1	0	0
400	2016	C38	0	0	0	0	2.3979	9.49148	23.3836	0.645235	0.0702165	0.0185	0.232697	0.464026	1.72298	0.000641212	0.0722318	13.7101	1	1	0	1	0	1	0	0
400	2017	C38	0	0	0	0	2.48491	9.52551	23.4517	0.747384	0.046052	0.0172	0.206222	0.461157	1.59018	0.000671274	0.0782584	13.8925	1	1	0	1	0	1	0	0
400	2018	C38	0	0	0.693147	0	2.07944	9.29475	23.4027	0.959776	0.0183171	0.0076	0.174145	0.461019	1.69773	0.000497438	0.0840533	13.8925	1	1	0	1	0	1	0	0
400	2019	C38	0	0	1.09861	1	2.30259	9.48922	23.4373	0.873629	0.0333345	0.0076	0.180408	0.48082	1.82086	0.00042753	0.0864789	14.0144	1	1	0	1	0	1	0	0
400	2020	C38	0	0	2.07944	1	2.3979	9.52447	23.545	0.757475	0.0503283	0.0076	0.201805	0.51758	1.70446	0.000428443	0.0950626	14.0144	1	1	0	1	0	1	0	0
400	2021	C38	0	0	1.38629	1	2.07944	9.60955	23.595	0.522299	0.0497256	0.0023	0.205849	0.428113	1.75874	0.000391963	0.0860563	14.0144	1	1	0	1	0	1	0	0
400	2022	C38	0	0	0.693147	0	2.07944	9.80502	23.6654	0.672545	0.0529408	0.0023	0.190379	0.438829	1.63593	0.000345404	0.0856935	14.0779	1	1	0	1	0	1	0	0
401	2012	C30	0	0	0	0	0	8.87787	24.4491	0.898184	0.00346779	0.0051	0.236565	0.640098	0.577425	0.00130712	0.580536	14.6441	1	0	0	0	1	0	1	0
401	2013	C30	0	0	0	0	0	8.92645	24.4867	1.05443	0.00469806	0.0051	0.254801	0.646363	0.545418	0.00125784	0.607138	14.6801	1	0	0	0	1	0	1	0
401	2014	C30	0	0	0	0	0	8.92535	24.5087	0.921437	-0.00636799	0.0051	0.209618	0.684682	0.420365	0.00138014	0.578374	14.6801	1	0	0	0	1	0	1	0
401	2015	C30	0	0	0	0	0.693147	8.60758	24.4437	0.924859	-0.0503974	0.0051	0.153239	0.614126	0.3515	0.00207066	0.596001	14.6801	1	0	0	0	1	0	1	0
401	2016	C30	0.693147	1	0	0	0	8.74141	24.4485	0.895001	-0.000571605	0.002	0.241735	0.539296	0.440921	0.00135721	0.562319	14.6993	1	0	0	0	1	0	1	0
401	2018	C30	0	0	0	0	0.693147	9.56959	24.8503	1.1303	0.0496881	0.002	0.306358	0.408418	0.738327	0.00115155	0.451912	14.7398	1	0	0	0	1	0	1	0
401	2019	C30	0	0	0	0	0	9.61793	24.8298	1.10791	0.0799275	0.002	0.370692	0.392601	0.648607	0.0012045	0.537034	14.7398	1	0	0	0	1	0	1	0
401	2020	C30	0	0	0	0	1.09861	9.66055	24.7999	1.28514	0.086625	0	0.350147	0.396941	0.963513	0.00107966	0.53161	14.7398	1	0	0	0	1	0	1	0
401	2021	C30	0	0	0	0	0.693147	9.67779	24.8231	1.04052	0.070119	0.0001	0.26891	0.677984	0.946427	0.00109749	0.536246	14.7398	1	0	0	0	1	0	1	0
401	2022	C30	0	0	0	0	1.38629	9.62865	24.8507	1.11194	0.0229977	0.0001	0.204829	0.632438	0.873544	0.00117235	0.523363	14.7901	1	0	0	0	1	0	1	0
402	2012	K	0	0	0	0	0	9.89266	24.9722	1.00882	0.0415644	0.0716	0.314656	0.314751	0.538548	0.000324197	0.0376595	14.6484	1	0	0	0	1	0	0	1
402	2013	K	0	0	0	0	0	10.0449	25.0549	1.12774	0.0481864	0.1183	0.375261	0.304839	0.641643	0.000248218	0.0342288	14.6484	1	0	0	0	1	0	0	1
402	2014	K	0	0	0	0	1.09861	10.1172	25.1959	0.897153	0.0380371	0.0849	0.306249	0.468861	0.53488	0.000282778	0.0327851	14.6484	1	0	0	0	1	0	0	1
402	2015	K	0	0	0	0	0.693147	9.76026	25.3837	0.950913	0.0234398	0.0804	0.300547	0.52886	0.667716	0.000395864	0.0273048	14.6484	1	0	0	0	1	0	0	1
402	2016	K	0	0	0	0	0.693147	10.0057	25.4492	1.00307	0.0257704	0.0587	0.300345	0.596304	0.820774	0.000308743	0.0233086	14.8307	1	0	0	0	1	0	0	1
402	2017	K	0	0	0	0	0.693147	10.2594	25.5533	1.004	0.034469	0.04	0.294079	0.600715	0.661536	0.00021551	0.0208512	14.7633	1	0	0	0	1	0	0	1
402	2018	K	0	0	0	0	0	10.1167	25.724	1.13739	0.0294984	0.0491	0.485991	0.611185	0.59688	0.000227164	0.017276	14.9074	1	0	0	0	1	0	0	1
402	2019	K	0	0	0	0	0.693147	10.284	25.8108	1.09984	0.0265406	0.0491	0.401544	0.611185	0.608949	0.000231227	0.015441	14.9404	1	0	0	0	1	0	0	1
402	2020	K	0	0	0	0	0.693147	9.90962	25.8544	1.13799	0.0133966	0.0491	0.328601	0.611185	0.662598	0.000184753	0.015605	14.9404	1	0	0	0	1	0	0	1
402	2021	K	0	0	0	0	1.38629	10.1799	25.8279	1.18452	0.00946846	0.0484	0.214471	0.569289	0.59525	0.00017785	0.0174618	14.9404	1	0	0	0	1	0	0	1
402	2022		0	0	0	0	1.38629	10.0801	25.754	1.21151	0.00407443	0.0466	0.156431	0.569289	0.674474	0.00019282	0.0163865	15.1319	1	0	0	0	1	0	0	1
403	2013	C27	0.693147	1	0	0	0	7.04193	20.8948	0.336315	0.0567648	0.0117	0.60085	0.331154	0.116641	0.00272009	0.273805	13.3047	0	1	0	1	0	1	0	0
403	2014	C27	0.693147	1	0	0	0	6.88629	20.9004	0.289801	0.0898226	0.0095	0.570895	0.330129	0.169636	0.00253054	0.521276	13.3047	0	1	0	1	0	1	0	0
403	2015	C27	0	0	0	0	0	6.91675	20.9586	0.20252	0.054361	0	0.529386	0.341686	0.209006	0.00288787	0.486242	13.3047	0	1	0	1	0	1	0	0
403	2016	C27	0	0	0	0	0	7.11762	20.9698	0.180475	0.0321396	0	0.561151	0.289625	0.460989	0.00304192	0.368327	13.3047	0	1	0	1	0	1	0	0
403	2017	C27	0	0	0	0	0	7.27413	21.0013	0.153417	0.0117259	0.0132	0.569813	0.524881	0.442321	0.00276295	0.339242	13.3047	0	1	0	1	0	1	0	0
403	2018	C27	0	0	0	0	0	7.52921	20.999	0.17819	0.0568127	0.0019	0.533255	0.504887	0.543502	0.001821	0.313491	13.653		1	0	1	0	1	0	0
403	2019	C27	0	0	0	0	0	7.63764	20.9636	0.137626	0.12192	0.0019	0.523389	0.498517	0.850504	0.00122212	0.298527	13.3847		1	0	1	0	1	0	0
403	2020	C27	0	0	0	0	0	7.79449	21.2256	0.086037	0.124943	0.355	0.4882	0.482606	0.673886	0.00111943	0.21193	13.5278		1	0	1	0	1	0	0
403	2021	C27	0	0	0	0	0	8.14429	22.6816	0.40528	0.089593	4.0442	0.460724	0.363018	2.69405	0.000962233	0.104367	13.5278		1	0	1	0	1	0	0
403	2022		0	0	0	0	0	8.2675	22.8005	0.497149	0.0779941	3.3757	0.521267	0.34007	2.52608	0.000688	0.109451	14.3163		1	0	1	0	1	0	0
404	2012	C34	0	0	0	0	0	9.01235	22.277	0.896952	0.0387193	0.0051	0.139887	0.384424	0.672817	0.000649932	0.176268	13.3535	1	1	0	1	0	0	0	1
404	2013	C34	0	0	0	0	0	9.16004	22.5741	0.920011	0.045731	0.003	0.156626	0.39527	0.938365	0.000802825	0.145463	13.1224	1	1	0	1	0	0	0	1
404	2014	C34	0	0	0	0	0	9.12455	22.611	0.80374	0.0446522	0.1906	0.166238	0.37906	1.03318	0.000815826	0.177803	13.1224	1	1	0	1	0	0	0	1
404	2015	C34	0	0	0	0	0	9.06677	22.665	0.776628	0.0488567	0.2926	0.152193	0.341213	1.13939	0.000804891	0.191124	13.1224	1	1	0	1	0	0	0	1
404	2016	C34	0	0	0	0	0	9.08094	22.8154	0.776003	0.0525132	0.3714	0.137183	0.351437	1.13973	0.000700917	0.167594	13.3692	1	1	0	1	0	0	0	1
404	2017	C34	0.693147	1	0.693147	0	0	9.22803	23.0237	0.960247	0.0234613	0.3061	0.118066	0.351161	1.06115	0.000652383	0.138801	13.5278	1	1	0	1	0	0	0	1
404	2018	C34	0.693147	1	2.48491	1	1.09861	9.26481	23.0352	1.17798	0.0163197	0.2605	0.120202	0.375979	1.15326	0.000358113	0.155907	13.567	1	1	0	1	0	0	0	1
404	2019	C34	0.693147	1	2.07944	1	1.38629	9.34299	23.0504	1.17272	0.00983307	0.2175	0.106596	0.368212	1.20689	0.000366955	0.150552	13.5278	1	1	0	1	0	0	0	1
404	2020	C34	0.693147	1	1.94591	1	1.38629	9.44266	23.1155	1.08811	0.017152	0.0439	0.114461	0.370438	1.14381	0.000287648	0.134751	13.5541	1	1	0	1	0	0	0	1
404	2021	C34	0.693147	1	1.38629	1	1.38629	9.68253	23.1856	1.13049	0.0255562	0.0439	0.0865208	0.360579	1.10387	0.000270242	0.124044	13.5924	1	1	0	1	0	0	0	1
404	2022	C34	0.693147	1	1.09861	1	0.693147	9.6617	23.2548	1.09429	0.034353	0.1518	0.107371	0.35833	1.0263	0.000247868	0.12164	13.5924	1	1	0	1	0	0	0	1
407	2012	C26	0	0	0	0	0	8.22975	21.8786	0.523343	-0.0441761	0.0104	0.0879475	0.130967	0.674265	0.000555133	0.252364	13.2177	0	1	0	0	1	0	1	0
407	2013	C26	0	0	0	0	0	8.24731	21.9735	0.614605	0.0152611	0.0099	0.0936671	0.109818	0.599527	0.000531971	0.230197	13.3047	0	1	0	0	1	0	1	0
407	2014	C26	0	0	0	0	0	8.69022	22.1349	0.642952	0.0139557	5.5249	0.083239	0.218757	0.810683	0.000398202	0.104284	13.3047	0	1	0	0	1	0	1	0
407	2015	C26	0	0	0	0	0.693147	8.42236	22.1468	0.528582	0.0100471	5.5246	0.099147	0.230708	0.737869	0.000500224	0.160286	13.3047	0	1	0	0	1	0	1	0
407	2016	D	0	0	0	0	0	8.39297	22.1825	0.504326	-0.0769301	4.859	0.129726	0.267499	0.865728	0.000548217	0.203027	13.487	0	0	0	0	1	0	1	0
407	2017	D	0	0	0	0	0	8.71466	22.3417	0.596647	0.0262532	0.0071	0.148147	0.234856	0.659939	0.000368583	0.209508	13.487	0	0	0	0	1	0	1	0
407	2018	D	0	0	0	0	0.693147	8.78743	22.5838	0.930903	0.0317099	0.0093	0.15806	0.238576	0.579699	0.000283112	0.22808	13.5278	0	0	0	0	1	0	1	0
407	2019	D	0	0	0	0	0.693147	8.89229	22.5965	0.967305	0.0315319	0.0093	0.15066	0.248728	0.551516	0.000277713	0.243986	13.5278	0	0	0	0	1	0	1	0
407	2020	D	0	0	0	0	0.693147	8.70854	22.6332	0.889972	0.0325199	0.0093	0.169302	0.225843	0.596099	0.000296143	0.265286	13.5278	0	0	0	0	1	0	1	0
407	2021	D	0	0	0	0	0	8.68035	22.6746	0.888692	0.0157972	0.0088	0.146329	0.30719	0.52254	0.000400626	0.269456	13.5278	0	0	0	0	1	0	1	0
407	2022	D	0	0	0	0	0	8.69445	22.6915	0.960886	0.025658	0.0088	0.146118	0.30719	0.522097	0.000267854	0.272834	13.5278	0	0	0	0	1	0	1	0
408	2012	F	0	0	0	0	0	5.10357	19.9271	0.201874	0.0110133	0	0.57433	0.226755	0.874215	0.00175383	0.129299	13.1224	0	0	0	0	1	0	0	1
408	2013	F	0	0	0	0	0	6.87398	20.173	0.305263	0.0319356	0	0.020222	0.221762	1.1882	0.000271913	0.0937969	13.1224	0	0	0	0	1	0	0	1
408	2014	F	0	0	0	0	0	5.98028	19.939	0.152881	-0.107281	0.0005	-0.00906094	0.219235	1.3529	0.00337266	0.0465618	13.1224	0	0	0	0	1	0	0	1
408	2015	F	0	0	0	0	0	6.74066	19.9552	0.086067	-0.131652	0.0005	0.0193531	0.209876	1.06585	0.000874953	0.0436246	13.4588	0	0	0	0	1	0	0	1
408	2016	F	0	0	0	0	0	7.97756	22.7194	0.704617	0.234962	11.0225	0.716593	0.743764	2.68275	0.000512137	0.44107	14.5087	0	0	1	0	0	0	0	1
408	2017	C26	0	0	0	0	0	8.18063	22.7703	0.54592	0.161128	10.874	0.730518	0.733744	2.78803	0.000195628	0.422153	14.6484	0	1	1	0	0	0	1	0
408	2018	C26	0	0	0	0	0	8.02576	22.9624	0.737207	0.0992604	10.8751	0.68348	0.733744	2.01736	0.000234505	0.336843	14.6484	0	1	1	0	0	0	1	0
408	2019	C26	0	0	0	0	0	7.69046	22.9896	0.856428	0.0323989	0.0011	0.581898	0.733744	1.28426	0.000407141	0.392167	14.6484	0	1	1	0	0	0	1	0
408	2020	C26	0	0	0	0	0	7.65264	22.884	0.819411	0.0249861	0.0011	0.323117	0.733744	2.30744	0.000359247	0.415165	14.6484	0	1	1	0	0	0	1	0
408	2021	C26	0	0	0	0	0	8.33085	23.0864	0.382641	0.147894	0.0008	0.588258	0.701154	1.9557	0.000675402	0.304724	14.6484	0	1	1	0	0	0	1	0
408	2022	C26	0	0	0	0	0	9.18164	23.3287	0.318834	0.4681	0.0014	0.819984	0.538403	3.15757	0.000407909	0.210845	14.6484	0	1	1	0	0	0	1	0
409	2012	F	0	0	0	0	0	6.89254	20.9043	0.437251	0.12942	0.0001	0.637119	0.289733	1.57822	0.00187535	0.256998	12.8992	0	0	0	1	0	0	0	1
409	2013	B	0	0	0	0	0	7.05294	21.2981	0.498515	0.0855831	0	0.622524	0.471021	0.828124	0.00149648	0.275862	12.8992	1	0	0	0	1	0	0	1
409	2014	B	0	0	0	0	0	6.66696	21.9208	0.599115	-0.0115877	0	0.340881	0.419313	0.21855	0.00264739	0.231516	12.8992	1	0	0	0	1	0	0	1
409	2015	B	0	0	0	0	0	8.14234	22.4596	0.624314	0.0274496	0.0001	0.225921	0.29914	0.442037	0.000511847	0.171878	12.8992	1	0	0	0	1	0	0	1
409	2016	S	0	0	0	0	0	8.15798	22.5475	0.604416	-0.0323053	0	0.119744	0.307387	0.315044	0.000736049	0.154107	13.5924	1	0	0	0	1	0	0	1
409	2017	S	0	0	0	0	0	7.70536	22.5106	0.828811	-0.0445711	0	0.0944883	0.296396	0.310732	0.00107672	0.176046	13.5924	1	0	0	0	1	0	0	1
409	2018	S	0	0	0	0	0	8.6042	22.2907	0.890688	0.0236555	0	0.0419755	0.300854	0.897632	0.000487407	0.147398	14.0779	1	0	0	0	1	0	0	1
409	2019	S	0	0	0	0	0	8.30721	22.0673	0.802906	-0.202089	0	0.0191905	0.300612	0.86067	0.000576963	0.172563	13.5924	1	0	0	0	1	0	0	1
409	2020	S	0	0	0.693147	0	2.70805	8.79296	20.7197	0.454075	0.0411546	0	0.100904	0.300612	1.42613	0.000505598	0.18738	13.5924	1	0	0	0	1	0	0	1
409	2021	I	0	0	1.38629	1	2.89037	7.28655	20.905	0.35065	0.0317816	0	0.439886	0.300612	1.15166	0.0019903	0.156263	12.8992	1	1	0	0	1	1	0	0
409	2022	I	0	0	3.04452	1	3.29584	7.9603	21.6309	0.597358	0.033253	0.0115	0.317966	0.431898	2.12861	0.00137765	0.0859437	12.8992	1	1	0	0	1	1	0	0
411	2012	F	0	0	0	0	2.3979	10.2094	22.1367	0.85658	0.0368964	0	0.0630571	0.392423	0.887235	0.000170133	0.0473795	13.8155	1	0	0	0	1	0	0	1
411	2013	F	0	0	0	0	1.94591	10.3156	22.2914	0.835831	0.0378942	0	0.061381	0.392423	0.89819	0.000185229	0.0458557	13.7321	1	0	0	0	1	0	0	1
411	2015	F	0	0	0	0	2.77259	10.4783	22.5356	0.60505	0.0271526	0.0162	0.0556232	0.394311	0.848173	0.000170173	0.0433013	13.7747	1	0	0	0	1	0	0	1
411	2016	F	0	0	0	0	2.63906	10.42	22.6673	0.707696	0.0292674	0.0227	0.0565791	0.394311	0.868827	0.000162895	0.068068	13.7747	1	0	0	0	1	0	0	1
411	2017	F	0	0	0	0	2.30259	10.4434	22.9297	0.803482	0.0238263	0.0198	0.0605763	0.546507	0.849993	0.000166446	0.0613074	13.8155	1	0	0	0	1	0	0	1
411	2018	F	0	0	0	0	2.19722	10.538	22.9197	0.943509	0.0247694	0.0205	0.0660961	0.547976	0.90989	0.00014926	0.0592744	13.8643	1	0	0	0	1	0	0	1
411	2019	F	0	0	0	0	3.09104	10.6941	23.1	0.995528	0.0341739	0.0139	0.0667602	0.622054	0.926939	0.000146764	0.0516418	13.9725	1	0	0	0	1	0	0	1
411	2020	F	0	0	0	0	3.2581	10.7205	23.1437	0.892999	0.0311367	0.0139	0.0621947	0.622054	0.998636	0.000150971	0.0479557	13.9725	1	0	0	0	1	0	0	1
411	2021	F	0	0	0	0	3.04452	10.6706	23.2284	0.985087	0.0337198	0.4554	0.0652808	0.606376	1.01533	0.000155343	0.0651058	13.9725	1	0	0	0	1	0	0	1
411	2022		0	0	0	0	2.94444	10.8233	23.3007	1.02283	0.0364064	0.539	0.0646732	0.600431	0.950822	0.000145464	0.0572609	14.2143	1	0	0	0	1	0	0	1
413	2012	C39	0	0	0	0	0	7.97624	21.4468	0.377264	0.197903	0.0032	0.512446	0.377024	2.10283	0.000964825	0.0244349	12.8992	0	1	0	0	1	1	0	0
413	2013	C39	0	0	0	0	0	7.82618	22.9241	0.745576	0.0738271	0.0011	0.56025	0.403827	7.78588	0.00107585	0.0156215	12.8992	0	1	0	0	1	1	0	0
413	2015	C39	0	0	0	0	0	8.23316	24.0836	0.725466	0.0674888	0.019	0.3978	0.350875	2.26926	0.000907033	0.239601	13.2177	0	1	0	0	1	1	0	0
413	2016	C39	0	0	0	0	0	8.56611	24.5697	0.701493	0.0346585	0.0046	0.301351	0.225494	3.51388	0.000607035	0.191182	14.2729	0	1	0	0	1	1	0	0
413	2017	C39	1.09861	1	0	0	0	9.36267	24.9381	0.817715	0.0338639	0.0039	0.208371	0.262813	2.01364	0.000370365	0.163874	14.8628	0	1	0	0	1	1	0	0
413	2018	C39	1.09861	1	1.09861	1	1.38629	9.88148	25.0079	1.10699	0.0323519	0.0039	0.177502	0.263526	1.54171	0.000231634	0.13275	15.0683	0	1	0	0	1	1	0	0
413	2019	C39	1.09861	1	1.09861	1	0	9.4685	24.9392	1.20018	-0.0222055	0.0025	0.157578	0.263526	1.23274	0.0003885	0.140427	15.0683	0	1	0	0	1	1	0	0
413	2020	C39	0	0	1.38629	1	1.38629	8.56827	24.895	1.24624	-0.0523811	0	0.0773105	0.24944	1.03258	0.00113256	0.146276	15.0683	0	1	0	0	1	1	0	0
413	2021	C39	0	0	1.60944	1	0.693147	8.4385	24.8582	1.23503	-0.0449596	0	0.099054	0.24944	0.943211	0.001892	0.118115	15.0683	0	1	0	0	1	1	0	0
413	2022		0	0	0.693147	0	1.38629	8.45457	24.7939	1.28624	-0.029653	0	0.139625	0.223792	0.871077	0.00136677	0.142798	14.8628	0	1	0	0	1	1	0	0
415	2012	L	0	0	0	0	0	7.91311	24.1246	1.01432	0.02595	0.0015	0.556826	0.613574	0.51549	0.000850258	0.281592	14.221	0	0	1	0	0	0	0	0
415	2013	L	0	0	0	0	0	8.42148	24.7685	0.990164	0.030618	0.0083	0.493303	0.613574	0.552842	0.000809666	0.445921	14.9074	0	0	1	0	0	0	0	0
415	2014	L	0	0	0	0	0.693147	8.47805	24.9387	0.890373	0.0188816	0.0059	0.464277	0.606394	0.65977	0.000902173	0.403033	14.9469	0	0	1	0	0	0	0	0
415	2015	L	0	0	0	0	2.07944	8.64858	25.6053	1.00354	0.0179163	0.0045	0.499178	0.574286	1.34165	0.00091218	0.362893	14.9787	0	0	1	0	0	0	0	0
415	2016	L	0	0	0	0	0.693147	9.50261	26.1015	0.985149	0.0163038	0.0026	0.366584	0.48086	0.982764	0.000505404	0.541395	15.0683	0	0	1	0	0	0	0	0
415	2017	L	0	0	0	0	0.693147	9.89169	26.4284	0.99965	0.0122088	0.009	0.411372	0.484367	0.743577	0.000550065	0.600205	14.9469	0	0	1	0	0	0	0	0
415	2018	L	0	0	0	0	0.693147	10.0399	26.3786	1.07053	0.00908979	0.0217	0.365997	0.480668	1.00058	0.000466944	0.636743	14.9469	0	0	1	0	0	0	0	0
415	2019	L	0	0	0	0	0	9.95884	26.305	1.07196	0.0120537	0.0217	0.372043	0.438447	0.606337	0.000475875	0.747623	14.7901	0	0	1	0	0	0	0	0
415	2020	L	0	0	0	0	0	9.62086	26.2456	1.06523	-0.0333321	0.0217	0.347645	0.415458	0.750925	0.000608969	0.751114	14.7901	0	0	1	0	0	0	0	0
415	2021	L	0	0	0	0	0.693147	9.58499	26.2376	1.05326	-0.00452992	0.0217	0.387087	0.415458	0.414661	0.000567173	0.762778	14.8451	0	0	1	0	0	0	0	0
415	2022		0	0	0	0	0	9.7381	26.2979	1.08375	-0.0092618	0.018	0.375469	0.415458	0.328171	0.000433053	0.761284	14.9942	0	0	1	0	0	0	0	0
417	2012	F	0	0	0	0	0	9.37662	22.6201	0.736937	0.0715458	0.0089	0.180825	0.384611	1.1637	0.000703683	0.167665	13.6877	1	0	0	1	0	0	0	1
417	2013	F	0	0	0	0	1.79176	9.49168	22.7405	0.839658	0.0668825	0.0088	0.180116	0.367066	1.0899	0.000760179	0.135621	13.487	1	0	0	1	0	0	0	1
417	2014	F	0	0	0	0	1.79176	9.47534	22.7964	0.74329	0.0576883	0.0065	0.204228	0.407845	1.00178	0.000863174	0.137951	13.487	1	0	0	1	0	0	0	1
417	2015	F	0	0	0	0	1.38629	9.39831	22.8389	0.642036	0.0409397	0.0065	0.198679	0.414647	0.824887	0.000907086	0.159966	13.487	1	0	0	1	0	0	0	1
417	2016	F	0	0	0	0	0.693147	9.38511	22.9452	0.780664	0.0413203	0.0065	0.198918	0.453185	0.847859	0.000897528	0.151084	13.487	1	0	0	1	0	0	0	1
417	2017	F	0	0	0.693147	0	1.09861	9.37589	23.0354	0.836479	0.0306306	0	0.201682	0.473189	0.791118	0.000907982	0.168826	13.5541	1	0	0	1	0	0	0	1
417	2021	F	0	0	0	0	1.38629	8.86493	23.28	1.14117	0.0205561	0	0.308271	0.455918	0.627928	0.00164173	0.146737	13.5278	1	0	0	1	0	0	0	1
417	2022	F	0	0	0.693147	0	1.60944	8.88707	23.293	1.07827	0.0175573	0	0.293348	0.405691	0.6712	0.0016624	0.135096	13.5278	1	0	0	1	0	0	0	1
419	2012	F	0	0	0	0	1.60944	8.535	22.0336	0.843053	0.0427022	0.0694	0.225439	0.479465	0.805972	0.00111252	0.354767	13.2177	1	0	0	1	0	0	0	1
419	2013	F	0	0	0	0	2.30259	8.66836	22.0622	0.767842	0.038631	0.0694	0.195969	0.479882	0.807046	0.00105413	0.31783	13.2177	1	0	0	1	0	0	0	1
419	2014	F	0	0	0	0	2.07944	8.69758	22.0529	0.685709	0.0363052	0.0694	0.19336	0.479882	0.889811	0.000990995	0.301276	13.2177	1	0	0	1	0	0	0	1
419	2015	F	0	0	0	0	2.83321	8.68875	22.0695	0.568291	0.0290657	0.0694	0.189079	0.473093	0.932632	0.0010667	0.276882	13.2177	1	0	0	1	0	0	0	1
419	2016	F	0	0	0	0	2.89037	8.54337	22.1039	0.643874	0.0297712	0.0694	0.199804	0.473745	0.900696	0.00111347	0.309904	13.3047	1	0	0	1	0	0	0	1
419	2017	F	0	0	0	0	2.56495	8.60658	22.1479	0.790907	0.0362679	0.0694	0.200042	0.47417	1.0328	0.00110382	0.280821	13.3047	1	0	0	1	0	0	0	1
419	2018	F	0	0	0.693147	0	1.60944	8.60636	22.3181	1.18401	0.0370561	0.0694	0.212977	0.469972	1.16582	0.00117221	0.223897	13.3047	1	0	0	1	0	0	0	1
419	2019	F	0	0	0	0	2.19722	8.54469	22.3529	1.16096	0.0398868	0.0694	0.217172	0.468689	1.2511	0.00115901	0.205885	13.3047	1	0	0	1	0	0	0	1
419	2020	F	0	0	0	0	1.94591	8.13087	22.3971	1.21256	0.0396112	0.0694	0.271243	0.469866	1.61163	0.00183168	0.187625	13.3047	1	0	0	1	0	0	0	1
419	2021	F	0	0	0	0	2.07944	8.15314	22.4802	1.17055	0.0288855	0.0542	0.256378	0.468879	1.71846	0.00140633	0.169267	13.3047	1	0	0	1	0	0	0	1
419	2022	F	0	0	0	0	1.94591	8.0965	22.378	0.857822	0.0300195	0.0542	0.248362	0.474556	1.85473	0.00148187	0.178589	13.3047	1	0	0	1	0	0	0	1
420	2012	C28	0	0	0	0	0	7.65051	21.9618	0.874382	0.00262535	0.0033	0.0747895	0.229758	0.487896	0.000956223	0.37454	12.8992	1	1	0	1	0	0	1	0
420	2013	C28	0	0	0	0	0	7.46642	22.1092	0.823325	-0.115604	0.0025	-0.00568058	0.235542	0.278146	0.000946082	0.341868	12.8992	1	1	0	1	0	0	1	0
420	2014	C28	0	0	0	0	0	7.19528	21.9198	0.735999	-0.000480705	0.0018	0.0603671	0.259086	0.470451	0.000962226	0.473919	13.0815	1	1	0	1	0	0	1	0
420	2015	C28	0	0	0	0	0	7.25552	21.6979	0.569571	0.000840578	0.0018	0.145512	0.259086	0.527846	0.000802403	0.476318	13.3047	1	1	0	1	0	0	1	0
420	2016	C28	0	0	0	0	0	7.48837	22.2538	0.741265	0.00636635	0.0013	0.116834	0.251851	0.912573	0.000450345	0.333389	13.0815	1	1	0	1	0	0	1	0
420	2017	C28	0	0	0	0	0	7.75608	22.5446	0.683644	0.0158176	0.0013	0.116812	0.262766	0.292464	0.000265435	0.448746	13.2177	1	1	0	1	0	0	1	0
420	2018	C28	0	0	0	0	0	7.87771	22.689	0.911155	0.0211376	0.0233	0.177199	0.259108	0.314489	0.000345439	0.41322	13.3047	1	1	0	1	0	0	1	0
420	2019	C28	0	0	0	0	0	7.78227	22.8608	0.879466	0.0127985	0.0206	0.200073	0.411076	0.348098	0.000353457	0.564322	13.3047	1	1	0	1	0	0	1	0
420	2020	C28	0	0	0	0	0	7.72647	22.8852	0.93418	-0.0270202	0.0196	0.0729498	0.411076	0.329235	0.000397599	0.521955	13.3047	1	1	0	1	0	0	1	0
420	2021	C28	0	0	0	0	0	8.0491	22.8949	0.508917	-0.0152218	0.0123	0.0887515	0.343614	0.276646	0.000282398	0.598748	13.3047	1	1	0	1	0	0	1	0
420	2022		0	0	0	0	0.693147	8.05041	23.076	0.645113	-0.0089679	0.008	0.0847469	0.258776	0.376772	0.000241506	0.552442	13.3047	1	1	0	1	0	0	1	0
421	2012	S	0	0	0	0	0	7.98973	21.6751	0.851206	0.0399645	0.017	0.0581395	0.38723	0.605477	0.000485396	0.24229	13.2177	1	0	0	0	1	0	0	1
421	2013	S	0	0	0	0	0	7.9626	21.6041	0.883484	0.0387876	0.017	0.0056419	0.38723	0.708859	0.000324924	0.241028	13.2177	1	0	0	0	1	0	0	1
421	2014	S	0	0	0	0	0	7.97038	21.5601	0.681461	0.0711721	0.0049	0.00326123	0.38723	1.21487	0.000441498	0.201609	13.2177	1	0	0	0	1	0	0	1
421	2015	D	0	0	0	0	0.693147	8.32446	22.6228	0.844171	0.0801774	0	0.160929	0.558749	0.720655	0.000410581	0.403231	13.8155	1	0	0	0	1	0	1	0
421	2016	D	0	0	0	0	0	8.38262	22.6752	0.871739	0.0421168	0	0.201261	0.561586	0.342818	0.000478651	0.38694	13.8155	1	0	0	0	1	0	1	0
421	2017	D	0	0	0	0	0	8.28913	23.1139	0.991287	0.0277552	0	0.246858	0.557384	0.455111	0.000435641	0.268151	13.8155	1	0	0	0	1	0	1	0
421	2018	D	0	0	0	0	0	8.24876	23.1599	1.08594	0.0215637	0	0.232379	0.557384	0.517841	0.000453716	0.276263	13.8155	1	0	0	0	1	0	1	0
421	2019	D	0	0	0	0	0.693147	8.23366	23.219	1.08809	0.0154811	0	0.190682	0.557384	0.471211	0.000452717	0.269985	13.8155	1	0	0	0	1	0	1	0
421	2020	D	0	0	1.60944	1	1.09861	8.87766	23.1207	0.997435	0.0512008	0	0.269867	0.557384	0.490715	0.000275599	0.302423	13.8155	1	0	0	0	1	0	1	0
421	2021	D	0	0	1.60944	1	0.693147	8.22835	23.3748	1.09594	0.0133288	0	0.206256	0.557384	0.463661	0.000538833	0.24392	13.8155	1	0	0	0	1	0	1	0
421	2022	D	0	0	0	0	0.693147	8.90361	23.4617	1.08219	0.00586985	0.1902	0.122644	0.551905	0.336656	0.000306806	0.232285	13.8155	1	0	0	0	1	0	1	0
422	2012	C26	0	0	0	0	0	9.52459	24.1127	0.94191	0.0522419	0.0438	0.197529	0.251025	0.417942	0.000298709	0.422037	14.221	1	1	0	1	0	0	1	0
422	2013	C26	0	0	0	0	0	9.23035	24.2887	1.05317	0.00616733	0.0246	0.147011	0.249886	0.515932	0.000299134	0.555406	14.152	1	1	0	1	0	0	1	0
422	2014	C26	0	0	0	0	0	9.22992	24.3443	1.02109	0.00217232	0.008	0.176476	0.24755	0.410855	0.00030651	0.506718	14.221	1	1	0	1	0	0	1	0
422	2015	C26	0	0	0	0	0	9.23366	24.4116	1.02808	0.00140249	0.008	0.153401	0.249736	0.407672	0.000287292	0.486999	14.221	1	1	0	1	0	0	1	0
422	2016	C26	0	0	0	0	0.693147	9.04365	24.4065	0.991706	-0.0353142	0.008	0.119004	0.249703	0.394513	0.000388543	0.519775	14.221	1	1	0	1	0	0	1	0
422	2018	C26	0	0	0	0	0.693147	9.06841	23.8983	0.97313	0.0108523	0.008	0.183953	0.220952	0.230766	0.000849401	0.440252	14.2538	1	1	0	1	0	0	1	0
422	2019	C26	0	0	0	0	0.693147	9.21843	23.8642	0.939932	0.00429308	0.008	0.142269	0.270767	0.332594	0.000380181	0.432856	14.221	1	1	0	1	0	0	1	0
422	2020	C26	0	0	0	0	0	9.1882	23.815	0.935037	0.0102645	0.008	0.106863	0.270767	0.45498	0.000312449	0.427911	14.221	1	1	0	1	0	0	1	0
422	2021	C26	0.693147	1	0	0	0	9.50534	23.7614	0.579129	0.0969758	0.006	0.246234	0.270767	0.476973	0.000250517	0.40843	14.221	1	1	0	1	0	0	1	0
422	2022	C26	0.693147	1	0	0	0	9.62451	23.7022	0.754521	0.13468	0.0074	0.190908	0.270377	0.566838	0.000221023	0.421774	14.221	1	1	0	1	0	0	1	0
423	2012	C27	0	0	0	0	0.693147	8.53731	22.3958	0.194116	0.220595	0.0484	0.736494	0.258275	4.04033	0.00109262	0.0980983	13.2177	1	1	0	0	1	1	0	0
423	2013	C27	0	0	0	0	2.63906	8.76149	22.5116	0.223449	0.215776	0.0484	0.634849	0.266536	4.42352	0.000893084	0.107246	13.473	1	1	0	0	1	1	0	0
423	2014	C27	0	0	0	0	2.77259	8.56207	22.7328	0.28908	0.204213	0.0543	0.655433	0.266674	2.92027	0.000926693	0.177763	13.473	1	1	0	0	1	1	0	0
423	2015	C27	0	0	0	0	1.94591	8.85958	22.8761	0.240981	0.203848	0.0317	0.646079	0.277586	3.23541	0.000776531	0.15834	13.473	1	1	0	0	1	1	0	0
423	2016	C27	0	0	0	0	1.79176	9.01253	23.0208	0.270448	0.199923	0.0317	0.669546	0.296054	3.06511	0.000780161	0.142511	13.5924	1	1	0	0	1	1	0	0
423	2017	C27	0	0	0	0	1.79176	9.1028	23.239	0.295262	0.183108	0.0317	0.650456	0.350344	2.47121	0.000784112	0.138142	13.3847	1	1	0	0	1	1	0	0
423	2018	C27	0	0	0	0	1.94591	9.09365	23.353	0.488309	0.159004	0.0317	0.659902	0.369833	3.00141	0.000494002	0.125022	13.2708	1	1	0	0	1	1	0	0
423	2019	C27	0	0	0	0	2.63906	8.11964	23.1789	0.47066	-0.0348998	0.0317	0.476514	0.374147	2.96839	0.000994337	0.185031	13.5278	1	1	0	0	1	1	0	0
423	2020	C27	0	0	0	0	2.77259	8.2626	23.1166	0.413419	0.00362497	0.0062	0.550018	0.396108	5.08351	0.00115364	0.203176	13.5924	1	1	0	0	1	1	0	0
423	2021	C27	0	0	0.693147	0	2.48491	8.41404	23.1767	0.346938	0.0388797	0.0001	0.623035	0.407064	4.86732	0.000969494	0.17735	13.7101	1	1	0	0	1	1	0	0
423	2022	C27	0	0	0	0	2.30259	8.49039	23.2595	0.437083	0.0642409	0.0001	0.68301	0.398874	4.06771	0.000957866	0.155393	13.7642	1	1	0	0	1	1	0	0
425	2012	C35	0	0	0	0	0	10.0933	24.5379	0.879145	0.0615887	0.0025	0.217505	0.558728	1.39284	0.000552719	0.129326	13.9553	1	1	0	0	1	1	0	0
425	2013	C35	0	0	0.693147	0	0	9.97187	24.6171	1.08871	0.0327772	0.0025	0.218038	0.558728	1.61437	0.000525519	0.12483	13.9978	1	1	0	0	1	1	0	0
425	2014	C35	0	0	0	0	0	9.75143	24.612	0.794738	0.008309	0.0023	0.22624	0.531016	1.45853	0.000804425	0.167667	14.1156	1	1	0	0	1	1	0	0
425	2015	C35	0	0	0	0	0.693147	9.43317	24.4777	0.818282	-0.00136921	0.0021	0.205006	0.471058	1.4039	0.000883381	0.141137	14.1156	1	1	0	0	1	1	0	0
425	2016	C35	0	0	0	0	1.09861	9.39057	24.5069	0.932209	0.00499719	0.0022	0.194424	0.476227	1.22116	0.000889515	0.171612	14.1156	1	1	0	0	1	1	0	0
425	2017	C35	0	0	0.693147	0	1.60944	9.94824	24.6307	0.855992	0.0219476	0.0022	0.188869	0.465322	1.2824	0.000743645	0.144508	14.1156	1	1	0	0	1	1	0	0
425	2018	C35	0	0	0	0	3.3322	10.365	24.8382	1.07925	0.0370321	0.0019	0.166889	0.469784	1.31296	0.000176252	0.117207	14.2729	1	1	0	0	1	1	0	0
425	2019	C35	0	0	0.693147	0	3.55535	10.6347	25.0709	0.903887	0.052625	0.0055	0.174532	0.486188	1.35303	0.000149185	0.0982794	14.2729	1	1	0	0	1	1	0	0
425	2020	C35	0	0	0.693147	0	3.29584	10.8384	25.2428	0.92867	0.0443043	0.0055	0.170709	0.47893	1.12263	0.00013852	0.0868446	14.2729	1	1	0	0	1	1	0	0
425	2021	C35	0	0	0.693147	0	3.43399	10.9452	25.424	0.918687	0.0559612	0.0019	0.162422	0.474393	1.08255	0.000144782	0.0782467	14.2729	1	1	0	0	1	1	0	0
425	2022		0	0	0	0	2.77259	10.7612	25.8885	0.987867	0.0301259	0.0002	0.202116	0.321903	0.973794	0.000243516	0.108269	14.6993	1	1	0	0	1	1	0	0
426	2012	B	0	0	0	0	0	7.35438	21.9249	0.479625	0.0327385	0.004	0.482623	0.495605	0.121726	0.00142848	0.402724	13.8155	0	0	0	1	0	0	0	1
426	2013	B	0	0	0	0	0	7.26476	22.172	0.760207	0.013178	0.0032	0.43172	0.57641	0.656484	0.002026	0.355377	13.8155	0	0	0	1	0	0	0	1
426	2014	B	0	0	0	0	0	7.63399	22.0927	0.53798	0.0385654	0.0233	0.22415	0.57641	0.338061	0.00136742	0.357196	13.8155	0	0	0	1	0	0	0	1
426	2016	B	0	0	0	0	0	7.30009	23.0018	0.590062	0.0128933	0.0115	0.446903	0.508129	0.681248	0.00232129	0.149466	14.3461	0	0	0	1	0	0	0	1
426	2017	B	0	0	0	0	0	7.95598	22.9566	0.539042	0.057982	3.5784	0.63539	0.468742	0.389839	0.00106535	0.356468	14.604	0	0	0	1	0	0	0	1
426	2018	B	0	0	0	0	0	8.12392	22.9131	0.749528	-0.0186851	3.5784	0.620899	0.467965	0.22841	0.000977204	0.32038	14.604	0	0	0	1	0	0	0	1
426	2019	B	0	0	0	0	0	7.10612	22.95	0.756287	0.0112292	3.6394	0.488372	0.457265	0.217135	0.002951	0.314394	14.604	0	0	0	1	0	0	0	1
426	2020	B	0	0	0	0	0	7.07513	22.9549	0.55644	-0.0197869	3.6351	0.488214	0.457265	0.160649	0.00276086	0.370431	14.604	0	0	0	1	0	0	0	1
426	2021	B	0	0	0	0	0	7.81147	22.9264	0.587041	0.0268357	0.0316	0.492428	0.463734	0.106303	0.0017015	0.383417	14.604	0	0	0	1	0	0	0	1
426	2022		0	0	0	0	0	7.76072	22.9875	0.680336	0.0186197	0.0261	0.444671	0.463734	0.11026	0.00123833	0.418873	14.604	0	0	0	1	0	0	0	1
428	2012	H	0	0	0	0	0.693147	7.33942	22.6272	0.846217	0.0190409	0	0.597036	0.473033	0.177726	0.00376894	0.503094	13.7101	1	0	0	1	0	0	0	0
428	2013	H	0	0	0	0	0.693147	7.45051	22.8078	0.761317	0.0150934	0.0346	0.637268	0.476699	0.159514	0.00374754	0.407607	13.7101	1	0	0	1	0	0	0	0
428	2014	H	0	0	0	0	0.693147	7.26866	22.9458	0.796004	-0.0111128	0.0303	0.51163	0.472577	0.182778	0.00418307	0.400547	14.221	1	0	0	1	0	0	0	0
428	2015	H	0	0	0	0	1.38629	7.07093	22.977	0.657403	-0.00373168	0.0169	0.542592	0.635222	0.301538	0.00522637	0.360364	14.221	1	0	0	1	0	0	0	0
428	2016	H	0	0	0	0	2.63906	6.87366	22.9103	0.740438	-0.0475043	0.0169	0.565513	0.647758	0.227238	0.00592806	0.416694	13.5924	1	0	0	1	0	0	0	0
428	2017		0	0	0.693147	0	1.60944	6.95314	22.9235	0.905006	-0.0078829	0.0054	0.552028	0.624603	0.283909	0.00570941	0.384458	13.5924	1	0	0	1	0	0	0	0
428	2018		0	0	0	0	1.60944	6.87289	22.6969	0.989991	-0.0860809	0.0054	0.538414	0.626401	0.321416	0.00602688	0.457173	13.5924	1	0	0	1	0	0	0	0
428	2019		0	0	0	0	1.60944	7.057	22.6054	0.968538	0.000298429	0.0045	0.508371	0.60545	0.275149	0.00481241	0.454975	13.5924	1	0	0	1	0	0	0	0
428	2020		0	0	0.693147	0	1.60944	6.30613	22.5352	0.877976	-0.0939181	0.0037	0.0856698	0.566684	0.150202	0.00563407	0.486432	13.5924	1	0	0	1	0	0	0	0
428	2021		0	0	0	0	0.693147	6.52351	22.451	0.798615	0.00120637	0	0.186982	0.566684	0.12409	0.00435983	0.429615	13.5924	1	0	0	1	0	0	0	0
428	2022		0	0	0	0	1.09861	6.31065	22.3902	0.499331	-0.0691921	0.0049	0.0628861	0.555888	0.100945	0.00531105	0.464933	13.5924	1	0	0	1	0	0	0	0
429	2012	G	0	0	0	0	0	6.86857	23.3	1.08936	0.0161227	0.0171	0.412947	0.434416	0.346858	0.00170764	0.624877	13.5278	1	0	0	0	1	0	0	1
429	2013	G	0	0	0	0	0	7.07398	23.2644	1.10549	0.0077411	0.0169	0.304483	0.441097	0.693643	0.00137737	0.606322	13.9978	1	0	0	0	1	0	0	1
429	2014	G	0	0	0	0	0	7.19423	23.2501	1.04578	0.0284711	0.0169	0.416828	0.436622	0.58221	0.00115326	0.573522	13.9978	1	0	0	0	1	0	0	1
429	2015	G	0	0	0	0	0	7.28588	23.2171	0.961362	0.0438182	0.0146	0.438378	0.439576	0.609141	0.00107544	0.54437	13.9978	1	0	0	0	1	0	0	1
429	2016	G	0	0	0	0	1.09861		23.5004	0.926568	0.0832043	0.0132	0.546545	0.565385	1.72874	0.000671811	0.577748	13.9978	1	0	0	0	1	0	0	1
429	2018	G	0	0	0	0	0.693147		23.5142	0.899067	0.115989	0.0138	0.602604	0.565398	0.739049	0.000569772	0.466378	13.9978	1	0	0	0	1	0	0	1
429	2019	G	0	0	0	0	0		23.5954	0.792565	0.0853439	0.0138	0.556429	0.565412	1.63103	0.000628473	0.505003	13.9978	1	0	0	0	1	0	0	1
429	2020	G	0	0	0.693147	0	0.693147		23.7063	0.948582	0.0729167	0.0065	0.561459	0.565416	1.18905	0.000538064	0.58435	14.0561	1	0	0	0	1	0	0	1
429	2021	G	0	0	0	0	1.09861		23.6611	0.886811	0.125661	0.0065	0.635119	0.565447	2.70131	0.00042285	0.563647	14.0561	1	0	0	0	1	0	0	1
430	2012	N	0	0	0	0	0	7.4573	20.0558	0.274084	0.21083	0.0017	0.333699	0.454158	0.626006	0.000531605	0.521829	12.8479	1	0	0	1	0	0	0	1
430	2013	N	0	0	0	0	0	7.16401	20.2171	0.386863	0.0939501	0.0017	0.33452	0.454158	1.07551	0.000915264	0.40376	12.8479	1	0	0	1	0	0	0	1
430	2014	N	0	0	0	0	0.693147	6.91927	20.3446	0.333169	0.0932683	0.0017	0.379014	0.454158	0.651461	0.000979248	0.682198	12.8479	1	0	0	1	0	0	0	1
430	2015	N	0	0	0	0	0.693147	7.1941	20.5872	0.234243	0.146817	0	0.432467	0.454158	0.694108	0.000948606	0.645629	12.8479	1	0	0	1	0	0	0	1
430	2016	N	0	0	0	0	0	7.01583	21.4383	0.492112	0.0414415	0	0.394836	0.454158	0.128891	0.00129612	0.306754	12.9715	1	0	0	1	0	0	0	1
430	2017	N	0	0	0	0	0	6.95995	21.5718	0.658254	0.0301456	0	0.310271	0.400901	0.408264	0.0017918	0.25982	12.9715	1	0	0	1	0	0	0	1
430	2018	N	0	0	0	0	0	6.81343	21.6379	0.890846	0.0103415	0	0.315182	0.400901	0.654482	0.00171625	0.234499	13.2177	1	0	0	1	0	0	0	1
430	2019	N	0	0	0	0	0	6.74396	21.7046	0.865531	0.00439923	0	0.299368	0.400901	0.737779	0.00176966	0.201135	13.2177	1	0	0	1	0	0	0	1
430	2020	N	0	0	0	0	0	5.84039	21.7513	0.885025	-0.0337504	0	-0.125882	0.400901	0.469811	0.00423117	0.183095	13.2177	1	0	0	1	0	0	0	1
430	2021	N	0	0	0	0	0	5.75439	21.7674	0.787382	-0.0479655	0	-0.219804	0.400901	0.19829	0.00370595	0.429944	13.2177	1	0	0	1	0	0	0	1
430	2022	N	0	0	0	0	0	5.33799	21.7747	0.58057	-0.0912036	0	-1.00402	0.400291	0.0940019	0.00457422	0.449554	13.4588	1	0	0	1	0	0	0	1
488	2012	C22	0	0	0	0	1.60944	9.25193	24.5887	1.12903	0.00100017	0.5435	0.155245	0.352191	0.732196	0.000561818	0.413854	14.771	1	0	0	0	1	0	1	0
488	2013	C22	0	0	0	0	1.79176	9.28436	24.5845	1.11924	0.014496	0.5578	0.183286	0.345649	0.682526	0.00058792	0.445724	14.771	1	0	0	0	1	0	1	0
488	2014	C22	0	0	0	0	1.94591	9.17518	24.7632	1.06171	0.00868875	0.5742	0.197814	0.34909	0.645987	0.000607561	0.435478	14.771	1	0	0	0	1	0	1	0
488	2015	C22	0	0	0	0	0	9.24579	25.0795	1.0267	0.0145111	0.5742	0.26881	0.339184	0.615883	0.000685721	0.310021	14.771	1	0	0	0	1	0	1	0
488	2016	C22	0	0	0	0	0	9.29658	25.1335	1.04672	0.0252436	0.5266	0.300421	0.370404	0.661637	0.000638748	0.350142	14.771	1	0	0	0	1	0	1	0
488	2017	C22	0	0	0	0	0	9.56462	25.3832	1.0103	0.040008	0.5464	0.330589	0.405197	0.758008	0.000647849	0.267242	14.771	1	0	0	0	1	0	1	0
488	2018	C22	0	0	0	0	0	9.53521	25.3803	1.09524	0.0243168	0.4191	0.312719	0.40679	0.670785	0.000335174	0.265043	15.0094	1	0	0	0	1	0	1	0
488	2019	C22	0	0	0	0	0	9.53712	25.3078	1.1243	0.0172503	0.4789	0.283646	0.407178	0.762409	0.000373321	0.351575	15.0094	1	0	0	0	1	0	1	0
488	2020	C22	0	0	0	0	0	9.53009	25.2404	1.09711	0.0201147	1.9276	0.2307	0.400379	0.602335	0.000333616	0.411155	15.0094	1	0	0	0	1	0	1	0
488	2021	C22	0	0	0	0	0	9.62148	25.1402	1.04862	0.0239619	1.8703	0.236147	0.400428	0.545916	0.000285393	0.430382	15.0094	1	0	0	0	1	0	1	0
488	2022	C22	0	0	0	0	0	9.61926	25.1577	1.12169	0.00379751	1.762	0.144688	0.400989	0.499001	0.000234514	0.400917	15.0094	1	0	0	0	1	0	1	0
498	2013	E	0	0	0	0	0	9.51701	22.9661	0.930672	0.0286652	0	0.130219	0.707356	0.737927	0.00042224	0.0492711	13.7747	1	0	0	0	1	0	0	1
498	2015	E	0	0	0	0	0	9.48141	23.0666	0.824586	0.036953	0	0.148148	0.693097	0.821535	0.00048249	0.0399211	13.7747	1	0	0	0	1	0	0	1
498	2016	E	0	0	0	0	0		23.4342	0.897865	0.0338555	0	0.142994	0.693706	0.77323	0.000478503	0.0365248	13.5766	1	0	0	0	1	0	0	1
498	2017	E	0	0	0	0	0		23.5927	0.929131	0.0353762	0	0.126889	0.683816	0.765216	0.00035013	0.0364927	13.5766	1	0	0	0	1	0	0	1
498	2018	E	0	0	0	0	0		23.8968	1.01153	0.0326169	0	0.107308	0.683816	0.699004	0.000269595	0.0271103	13.5766	1	0	0	0	1	0	0	1
498	2019	E	0	0	0	0	0		24.1909	1.10359	0.0292859	0	0.0927644	0.683816	0.653511	0.000224804	0.0283334	13.4856	1	0	0	0	1	0	0	1
498	2020	E	0	0	1.09861	1	0.693147		24.7321	1.027	0.0338644	0.0002	0.103735	0.651093	1.09789	0.000230444	0.0420935	13.4856	1	0	0	0	1	0	0	1
498	2021	E	0	0	0.693147	0	1.09861	10.7949	25.1468	1.06331	0.0397354	0.0002	0.117678	0.666487	1.06546	0.000239867	0.0388236	13.4856	1	0	0	0	1	0	0	1
498	2022	E	0	0	0.693147	0	0.693147	10.8775	25.3585	1.12467	0.0340388	0.0001	0.121906	0.62565	1.03929	0.000235572	0.0343848	13.8643	1	0	0	0	1	0	0	1
501	2012	F	0	0	0	0	0	9.45157	23.1247	0.775587	0.0502163	0.0048	0.203796	0.4274	0.440974	0.000171396	0.338148	14.0779	1	0	0	1	0	0	0	1
501	2013	F	0	0	0	0	2.56495	9.50319	23.2597	0.790642	0.0512148	0.004	0.203596	0.4473	0.431551	0.000155429	0.374788	14.0779	1	0	0	1	0	0	0	1
501	2014	F	0	0	0	0	1.94591	9.40265	23.4738	0.786063	0.0453415	0.004	0.208242	0.458439	0.298287	0.000171225	0.465519	14.0779	1	0	0	1	0	0	0	1
501	2015	F	0	0	0	0	1.94591	9.43547	23.5998	0.720233	0.0479443	0.5142	0.217616	0.419279	0.252811	0.000169878	0.414394	14.0779	1	0	0	1	0	0	0	1
501	2016	F	0	0	0	0	1.79176	9.46957	23.6019	0.790584	0.0558777	0.4596	0.222067	0.391962	0.323289	0.000151263	0.400641	14.221	1	0	0	1	0	0	0	1
501	2017	F	0	0	0.693147	0	2.19722	9.50856	23.6147	0.802654	0.0693283	0.2153	0.22705	0.392161	0.291506	0.000143197	0.377084	14.221	1	0	0	1	0	0	0	1
501	2018	F	0	0	0	0	2.19722	9.51587	23.8538	1.03833	0.0513339	0.2018	0.223236	0.392161	0.301355	0.000142408	0.291296	14.221	1	0	0	1	0	0	0	1
501	2019	F	0	0	0	0	1.79176	9.52459	23.8843	0.971139	0.052709	0.2052	0.224296	0.374974	0.23139	0.000156067	0.273988	14.2855	1	0	0	1	0	0	0	1
501	2020	F	0	0	0.693147	0	1.79176	8.69366	23.8501	1.04371	0.0235974	0.1606	0.351245	0.374974	0.267955	0.000295487	0.275321	14.2855	1	0	0	1	0	0	0	1
501	2021	F	0	0	0	0	1.60944	8.62677	24.0622	1.10128	0.0295123	0.1606	0.458997	0.374974	0.274434	0.000379008	0.217717	14.3461	1	0	0	1	0	0	0	1
501	2022	F	0	0	0	0	1.60944	8.27498	24.1489	1.07697	0.0103409	0.1606	0.447465	0.374974	0.24309	0.000351766	0.449747	14.3461	1	0	0	1	0	0	0	1
503	2012	I	0	0	1.38629	1	4.39445	6.58424	21.1143	0.212054	0.0154583	0	0.636181	0.296355	5.71813	0.00520435	0.0576522	13.4588	0	1	0	0	1	0	0	1
503	2013	I	0	0	1.38629	1	4.82028	6.59626	21.0796	0.075464	0.00848608	0	0.576494	0.297196	7.37362	0.00491915	0.0633403	13.7101	0	1	0	0	1	0	0	1
503	2014	I	0	0	1.09861	1	4.27667	6.44287	21.0844	0.050893	0.0135087	0	0.48214	0.297221	11.0525	0.00616005	0.0739025	14.152	0	1	0	0	1	0	0	1
503	2015	I	0	0	1.09861	1	4.62497	6.50729	21.1165	0.049108	0.00661274	0	0.432014	0.299813	11.7801	0.00724716	0.0476669	13.7101	0	1	0	0	1	0	0	1
503	2016	I	0	0	2.07944	1	4.96284	6.72689	21.1236	0.039402	0.0088111	0.0461	0.32092	0.301705	14.2357	0.00712604	0.031514	13.7101	0	1	0	0	1	0	0	1
503	2017	I	0	0	2.77259	1	4.41884	6.65886	21.0938	0.037289	-0.000203834	0	0.0174567	0.275874	17.1476	0.00907426	0.027031	13.7101	1	1	0	0	1	0	0	1
503	2018	I	0	0	1.09861	1	4.45435	6.0467	20.9704	0.089314	-0.138305	0	-0.629208	0.283668	12.2523	0.0125887	0.0258278	13.7101	1	1	0	0	1	0	0	1
503	2019	I	0	0	2.30259	1	4.26268	6.64455	20.9896	0.084398	0.0119845	0	-0.257121	0.279948	11.6686	0.0088956	0.00949236	13.7101	1	1	0	0	1	0	0	1
503	2020	I	0	0	2.30259	1	2.89037	7.12204	20.9832	0.165275	-0.18704	0	0.14684	0.278779	3.09796	0.00522589	0.00898485	13.7101	1	1	0	0	1	0	0	1
503	2021	I	0.693147	1	2.19722	1	3.09104	7.31143	20.8992	0.076421	-0.142317	0.1689	0.133968	0.274116	2.17651	0.00491825	0.00918716	13.7101	1	1	0	0	1	0	0	1
504	2012	R	0	0	0	0	0	6.76575	18.147	0.044195	-0.857696	0	0.376738	0.451905	0.458617	0.00211556	0.0208343	12.7657	1	0	0	0	1	0	0	1
504	2013	R	0	0	0	0	0	5.04543	18.651	0.063913	0.132006	0	-0.0426464	0.446953	0.408939	0.0061654	0.438051	13.3047	1	0	0	0	1	0	0	1
504	2015	R	0	0	0	0	0	4.97913	18.6257	0.013018	-0.187736	0	0.107902	0.414603	0.448397	0.0140375	0.282859	13.5278	1	0	0	1	0	0	0	1
504	2016	R	0	0	0	0	0	6.329	19.5232	0.056092	0.136326	0	0.322189	0.498426	0.769846	0.00376755	0.0367918	13.9108	1	0	0	1	0	0	0	1
504	2017	R	0	0	0	0	0	6.41458	19.8188	0.053418	-0.102694	0	0.2642	0.469557	0.846082	0.00557087	0.0254549	13.3047	1	0	0	1	0	0	0	1
504	2018	M	0	0	0	0	0	6.33687	19.6524	0.083396	-0.101808	0	0.658111	0.466418	0.508987	0.00401498	0.0554954	13.4588	1	0	0	1	0	0	0	1
504	2019	M	0	0	0	0	1.09861	6.82382	19.4077	0.100708	0.0597978	0	0.629681	0.466418	0.836528	0.00296554	0.0434335	13.4588	1	0	0	1	0	0	0	1
504	2020	M	0	0	0	0	0.693147	7.08145	20.1365	0.131641	0.0355027	0	0.555245	0.466418	1.1112	0.00173934	0.0208493	13.3847	1	0	0	1	0	0	0	1
504	2021	M	0.693147	1	0.693147	0	1.09861	6.83141	20.3066	0.104183	-0.05447	0	0.708314	0.419809	0.956487	0.00307974	0.0250416	13.2177	1	0	0	1	0	0	0	1
504	2022	M	0.693147	1	0	0	1.38629	7.02253	20.131	0.135235	-0.0490987	0	0.647918	0.416671	0.904611	0.00267553	0.0368173	13.1597	1	0	0	1	0	0	0	1
505	2012	K	0	0	0	0	0	6.51121	21.0773	0.614159	-0.0927914	0.008	0.272276	0.275891	0.686343	0.00553561	0.23465	13.3535	1	0	0	0	1	0	0	1
505	2013	K	0	0	0	0	0	6.49575	20.9365	0.491396	0.00651031	0.008	0.263136	0.274213	0.470289	0.00484676	0.365793	13.3847	1	0	0	0	1	0	0	1
505	2014	K	0	0	0	0	0	6.10092	21.2213	0.35879	-0.125387	0.008	0.217832	0.299028	0.373872	0.00455941	0.265518	13.3847	1	0	0	0	1	0	0	1
505	2015	K	0	0	0	0	0	6.22656	21.2624	0.279623	-0.0756702	0.008	0.219395	0.310469	0.37738	0.00354661	0.238752	13.5278	1	0	0	0	1	0	0	1
505	2019	C13	0	0	0	0	2.77259	9.26439	22.3779	0.936785	0.0352051	0	0.0841665	0.521068	0.761043	0.000236314	0.231388	13.7101	1	0	0	0	1	0	0	1
505	2020	C13	0	0	0	0	2.48491	9.44756	22.4629	0.741299	0.0401261	5.662	0.0744591	0.520132	0.879733	0.000205381	0.198603	13.6292	1	0	0	0	1	0	0	1
505	2021	C13	0	0	0	0	1.79176	9.75233	22.5228	0.793314	0.040748	5.662	0.0617133	0.520132	0.77759	0.000168976	0.185353	13.6292	1	0	0	0	1	0	0	1
505	2022	C13	0	0	0	0	1.79176	9.86412	22.5324	0.759835	0.0270334	5.662	0.048243	0.520132	1.02213	0.000163018	0.171569	13.8155	1	0	0	0	1	0	0	1
506	2012	K	0	0	0	0	0	8.3935	22.3618	0.536227	0.0553173	0	0.330665	0.669072	0.565892	0.000737627	0.0133833	13.3047	0	0	0	0	1	0	0	1
506	2013	K	0	0	0	0	0	7.8672	21.9424	0.585813	0.0410936	0	0.10422	0.521085	0.876709	0.00072322	0.0858964	13.3047	0	0	0	0	1	0	0	1
506	2015	B	0	0	0	0	0	8.00936	21.8989	0.305887	0.00181218	0	0.251349	0.479557	0.93915	0.000764683	0.113545	13.7101	0	0	0	0	1	0	0	1
506	2016	B	0	0	0	0	0	7.40775	21.8954	0.272582	0.00305601	0.009	0.375297	0.480225	0.90541	0.00125778	0.139107	13.3047	0	0	0	0	1	0	0	1
506	2017	B	0	0	0	0	0	7.27872	21.6583	0.306411	-0.16461	0.009	0.105252	0.371604	0.706133	0.00131842	0.222216	13.7101	0	0	0	0	1	0	0	1
506	2018	B	0	0	0	0	1.09861	6.85086	21.6526	0.64665	0.0117535	0.0022	0.0596501	0.370802	0.752397	0.00156428	0.223739	13.8155	0	0	0	0	1	0	0	1
506	2019	B	0	0	0	0	0.693147	6.90555	21.6872	0.623824	-0.012471	0.0022	0.0695701	0.370802	0.578042	0.00154044	0.20376	13.7101	0	0	0	0	1	0	0	1
506	2020	B	0	0	0	0	0.693147	6.75129	21.5662	0.583932	-0.196465	0.0022	0.303296	0.370802	0.166841	0.00180547	0.202784	13.7101	0	0	0	0	1	0	0	1
506	2021	B	0	0	0	0	0	7.53434	21.2468	0.395538	-0.0684319	0	0.119198	0.370802	0.153614	0.00106949	0.254662	13.7101	0	0	0	0	1	0	0	1
506	2022		0	0	0	0	0	6.30403	21.2643	0.424604	0.130864	0	-0.061857	0.370802	0.216132	0.00292839	0.307323	14.0779	0	0	0	0	1	0	0	1
507	2012	G	0	0	0	0	1.09861	7.01741	21.9869	0.776847	0.0436769	0.0028	0.19586	0.280894	1.7984	0.00152921	0.263375	13.7101	1	0	0	0	1	0	1	0
507	2013	G	0	0	0	0	1.09861	7.70128	22.0922	0.701507	0.0243969	0.0028	0.12938	0.280053	2.59616	0.000754455	0.226305	13.7101	1	0	0	0	1	0	1	0
507	2014	G	0	0	0	0	0	8.00162	22.4023	0.553896	0.00364369	0.0028	0.149019	0.280645	0.678602	0.000554203	0.329689	13.7642	1	0	0	0	1	0	1	0
507	2015	G	0	0	0	0	0	7.83722	22.4234	0.647132	0.014869	0.0028	0.192654	0.28188	0.83725	0.000690208	0.395245	13.8155	1	0	0	0	1	0	1	0
507	2016	G	0	0	0	0	0.693147	7.67343	22.4674	0.741366	0.0214771	0.0028	0.224022	0.28495	0.928794	0.000732161	0.442987	13.8155	1	0	0	0	1	0	1	0
507	2017	G	0	0	0	0	1.38629	7.70227	22.5008	0.550063	0.0285096	0.0028	0.241594	0.285457	1.04158	0.000732009	0.428343	13.9108	1	0	0	0	1	0	1	0
507	2018	G	0	0	0	0	2.30259	7.99796	22.6459	0.782097	0.0302665	0.0028	0.191693	0.285457	0.828338	0.000648513	0.383192	13.9108	1	0	0	0	1	0	1	0
507	2019	G	0	0	0	0	1.94591	8.22254	22.948	0.994832	0.0307103	0.0024	0.158895	0.370592	1.01461	0.000579229	0.318891	13.9978	1	0	0	0	1	0	1	0
507	2020	G	0	0	0	0	0	8.11709	23.325	1.04058	0.0252893	0.0024	0.172723	0.370592	0.873109	0.000574688	0.365717	13.9978	1	0	0	0	1	0	1	0
507	2021	G	0	0	0	0	0.693147	8.60035	23.5989	1.07994	0.0336811	0.0024	0.172127	0.355194	0.965269	0.000514786	0.313888	14.221	1	0	0	0	1	0	1	0
507	2022		0	0	0	0	0.693147	8.33445	23.7635	1.23067	0.0241175	0.0024	0.237615	0.355194	1.14666	0.000726175	0.341739	14.2729	1	0	0	0	1	0	1	0
509	2012	C29	0	0	0	0	0	6.6702	19.9272	0.205128	-0.193611	0.0172	0.00175435	0.3533	0.158941	0.0017302	0.38039	13.1224	1	1	1	0	0	1	0	0
509	2013	C29	0	0	0	0	0	6.65249	20.4129	0.261671	0.0268031	0.0134	0.0407736	0.3493	0.553266	0.00182544	0.169394	13.1224	0	1	1	0	0	1	0	0
509	2014	C29	0	0	0	0	0	6.60959	20.2558	0.197344	-0.080831	0	0.108299	0.340515	0.391822	0.00270854	0.203608	13.0815	0	1	1	0	0	1	0	0
509	2015	C29	0	0	0	0	0.693147	6.42434	20.1573	0.09872	0.0332359	0.0756	0.175199	0.318378	0.489201	0.00284454	0.20829	13.1224	0	1	1	0	0	1	0	0
509	2016	C29	0	0	0	0	1.38629	6.2432	19.6489	0.064367	-0.164535	0.0756	0.0691659	0.316936	0.572137	0.00948642	0.0593062	13.5924	0	1	1	0	0	1	0	0
509	2018	C29	0	0	0	0	0	9.16649	19.148	0.085493	-0.198947	0.0005	0.02227	0.316326	0.757171	0.000361377	0.0507918	13.5924	0	1	1	0	0	1	0	0
509	2019	C29	0	0	0	0	0	6.27025	18.8709	0.070185	-0.678728	0.0005	0.506466	0.289663	0.342962	0.00414551	0.0929173	13.5924	0	1	1	0	0	1	0	0
509	2020	C29	0	0	0	0	0	6.60083	19.4231	0.114608	0.0612383	0.0004	0.332178	0.228218	1.77546	0.00641221	0.0434046	13.3047	0	1	1	0	0	1	0	0
509	2021	Q	0	0	0	0	0.693147	7.00162	20.1697	0.204657	-0.00387347	0.0004	0.155244	0.443603	0.477766	0.00143531	0.149802	13.3047	1	0	1	0	0	0	0	0
509	2022		0	0	0	0	0	8.11834	20.2325	0.136958	0.0111168	0.0004	0.091032	0.443603	0.610522	0.000518801	0.143108	13.2357	1	0	1	0	0	0	0	0
510	2012	C26	0	0	0	0	0	7.98493	21.5567	0.491725	0.00185717	0.0012	0.0182128	0.107444	0.591586	0.000563174	0.595248	13.1224	0	1	1	0	0	0	1	0
510	2013	C26	0	0	0	0	0	7.93848	21.3342	0.444213	-0.0922694	0.0007	0.00154496	0.107444	0.368052	0.000686411	0.681309	13.1224	0	1	1	0	0	0	1	0
510	2014	C26	0	0	0	0	0	7.99104	21.3131	0.414977	-0.0802316	0.0005	0.0355248	0.097595	0.425186	0.000647271	0.626613	13.3047	1	1	1	0	0	0	1	0
510	2015	C26	0	0	0	0	0	7.79746	21.1567	0.275667	0.00390716	10.0005	0.055307	0.18348	0.427085	0.000789722	0.656818	15.6073	0	1	1	0	0	0	1	0
510	2016	C26	0	0	0	0	0	7.77204	21.0022	0.177917	0.0379305	10	0.170497	0.185386	0.340734	0.000843965	0.715003	13.3047	0	1	1	0	0	0	1	0
510	2017	C26	0	0	0	0	0	7.90647	21.1292	0.269548	0.0299652	13.0549	0.171225	0.265935	0.631191	0.000927918	0.601691	13.3047	0	1	1	0	0	0	1	0
510	2018	C26	0	0	0	0	0	8.10357	21.1183	0.533605	0.0689162	13.0549	0.168921	0.266493	0.791112	0.000818602	0.577408	13.3047	0	1	1	0	0	0	1	0
510	2019	C26	0	0	0	0	0	8.23589	21.1998	0.546109	0.0418293	13.0549	0.133691	0.246499	0.674242	0.000780174	0.500162	13.3047	0	1	1	0	0	0	1	0
510	2020	C26	0	0	0	0	0	8.14605	21.3201	0.535057	0.04402	10.0549	0.159608	0.216499	0.728142	0.0010212	0.513635	13.4588	0	1	1	0	0	0	1	0
510	2021	C26	0	0	0	0	0.693147	8.43145	21.5009	0.512654	0.152033	8.8238	0.265632	0.184194	0.919161	0.000987556	0.453092	13.5924	0	1	1	0	0	0	1	0
510	2022	C26	0	0	0	0	0	8.43979	21.5551	0.53899	0.00592497	9.1578	0.136457	0.204188	0.851225	0.000979494	0.446507	13.3047	0	1	1	0	0	0	1	0
513	2012	C27	0	0	0	0	0	8.58153	22.452	0.50168	0.0928473	0	0.601958	0.469827	1.02154	0.000890146	0.200095	13.7101	0	1	0	0	1	1	0	0
513	2013	C27	0.693147	1	0	0	0	8.58785	22.6052	0.547528	0.0859011	0	0.633095	0.469827	1.00403	0.000946792	0.301083	13.7101	0	1	0	0	1	1	0	0
513	2015	C27	0.693147	1	0	0	1.79176	8.78062	22.8124	0.435611	0.0857682	0.2691	0.611008	0.640553	0.822193	0.000915793	0.411483	14.1376	0	1	0	0	1	1	0	0
513	2016	C27	0.693147	1	0	0	1.60944	8.91705	23.0774	0.510598	0.0892056	0.2658	0.640895	0.613655	1.47149	0.000946974	0.317304	14.3102	0	1	0	0	1	1	0	0
513	2017	C27	0.693147	1	0	0	1.60944	9.0166	23.4894	0.497489	0.33963	0.2659	0.638601	0.603879	2.3231	0.0010948	0.208911	14.3102	0	1	0	0	1	1	0	0
513	2018	C27	0	0	0	0	1.60944	9.05317	23.5819	0.812026	0.0708992	0.2304	0.620834	0.59742	2.11464	0.000616631	0.184522	14.3102	0	1	0	0	1	1	0	0
513	2019	C27	0	0	0	0	1.60944	9.09825	23.6123	0.594761	0.0825428	0.2573	0.638589	0.612574	2.21101	0.000670609	0.175791	14.3102	0	1	0	0	1	1	0	0
513	2020	C27	0	0	1.09861	1	1.60944	9.20784	23.7481	0.566189	0.110525	0.332	0.650802	0.60133	2.16009	0.00063143	0.160415	14.3102	0	1	0	0	1	1	0	0
513	2021	C27	0	0	0.693147	0	1.94591	9.31155	23.8311	0.597199	0.0908742	0.3632	0.647452	0.608859	1.87866	0.000550554	0.164033	14.3977	0	1	0	0	1	1	0	0
513	2022	C27	0	0	0.693147	0	1.94591	9.32954	23.9367	0.713062	0.0827974	0.3641	0.646759	0.59958	2.02009	0.000520095	0.159567	14.3977	0	1	0	0	1	1	0	0
514	2012	K	0	0	0	0	0	6.84238	22.6352	0.89606	0.00492009	0	0.442416	0.666318	0.877955	0.00141877	0.181456	13.1224	1	0	0	0	0	0	0	1
514	2013	K	0	0	0	0	0	7.19338	22.759	0.937344	0.0126669	0	0.256566	0.641771	0.482552	0.000651591	0.208279	13.2177	1	0	0	0	0	0	0	1
514	2015	K	0	0	0	0	0	7.42302	22.7191	0.535471	-0.01329	0	0.232064	0.642531	0.379395	0.000627307	0.210643	13.4588	1	0	0	0	0	0	0	1
514	2016	K	0	0	0	0	0	7.11483	22.6076	0.503429	0.011101	0	0.349674	0.6424	0.821867	0.000855429	0.114431	13.1224	1	0	0	0	0	0	0	1
514	2017	K	0	0	0	0	0	7.60275	22.5649	0.786988	0.0152827	0	0.243252	0.637959	0.931614	0.000349874	0.114919	13.1224	1	0	0	0	0	0	0	1
514	2018	K	0	0	0	0	0	6.95172	22.6059	1.06215	0.00675592	0	0.237603	0.649663	0.632408	0.000655014	0.106195	13.1224	1	0	0	0	0	0	0	1
514	2021	K	0	0	0	0	0	7.76148	22.85	1.08765	0.0252415	0	0.394161	0.641299	0.482698	0.000411651	0.0737274	13.1224	1	0	0	0	0	0	0	1
514	2022	K	0	0	0	0	0	7.49501	22.7207	1.0787	0.0198889	0	0.348502	0.63848	0.498748	0.00054631	0.0801384	13.1224	1	0	0	0	0	0	0	1
516	2012	F	0	0	0	0	2.07944	8.37399	22.0135	0.657476	0.0327074	1.644	0.191152	0.291022	0.5732	0.000803756	0.456139	12.7657	0	0	1	0	0	0	0	1
516	2013	F	0	0	0	0	2.07944	8.43484	22.0074	0.554934	0.0335464	1.644	0.200853	0.288051	0.592027	0.000784016	0.436778	12.7657	0	0	1	0	0	0	0	1
516	2014	F	0	0	0	0	2.19722	8.53224	21.9798	0.333418	0.0983204	1.644	0.206541	0.289486	0.744884	0.000715866	0.42907	12.7657	0	0	1	0	0	0	0	1
516	2015	F	0	0	0	0	2.94444	8.53591	22.3935	0.299381	0.0546064	2.3355	0.202306	0.258092	1.42718	0.000818782	0.282659	12.7657	0	0	1	0	0	0	0	1
516	2016	F	0	0	0	0	2.07944	8.54589	22.438	0.319163	0.0370413	2.418	0.202488	0.258917	1.41704	0.000825433	0.268175	12.7657	0	0	1	0	0	0	0	1
516	2017	F	0	0	0	0	2.07944	8.58853	22.4867	0.497524	0.0345597	2.5573	0.198882	0.260256	0.987981	0.000845922	0.242847	12.7657	0	0	1	0	0	0	0	1
516	2018		0	0	1.09861	1	2.07944	8.16549	22.712	0.652238	0.341469	2.8111	0.221038	0.262793	2.43614	0.001353	0.0859173	12.7657	0	0	1	0	0	0	0	0
516	2019	Q	0	0	0.693147	0	2.30259	6.78581	23.029	0.691932	-0.0475905	2.811	0.143104	0.262793	0.840248	0.00396443	0.452186	12.7657	0	0	1	0	0	0	0	0
516	2020	Q	0	0	1.60944	1	1.60944	7.1689	23.2185	0.38557	0.00314476	2.8156	-0.0920972	0.262793	0.725899	0.00282921	0.513761	13.1224	0	0	1	0	0	0	0	0
516	2021	Q	0	0	1.38629	1	2.07944	7.68826	23.3126	0.447426	-0.0664297	2.4932	0.0148617	0.361547	0.642789	0.00214518	0.571454	13.1224	0	0	1	0	0	0	0	0
516	2022		0	0	1.79176	1	2.19722	7.70306	23.3083	0.402335	-0.0899276	2.4956	-0.0656648	0.358442	0.658853	0.00230456	0.42859	13.1224	0	0	1	0	0	0	0	0
517	2012	K	0	0	0	0	0	9.54297	23.0962	0.933105	0.040302	0.033	0.441796	0.849505	0.222329	0.000338718	0.000968567	13.1616	0	0	0	0	1	0	0	1
517	2013	K	0	0	0	0	0	10.3702	22.8305	0.953047	0.0478418	0.0283	0.233196	0.849505	0.448716	0.000197472	0.00108508	13.1616	0	0	0	0	1	0	0	1
517	2014	K	0	0	0	0	0.693147	10.1169	22.5155	0.867707	0.0434709	0.0236	0.194353	0.849505	0.398559	0.000212075	0.0012005	13.1616	0	0	0	0	1	0	0	1
517	2015	K	0	0	0	0	0	9.05925	22.7945	0.316233	0.0148182	6.1469	0.290264	0.776068	0.948819	0.000613169	0.000702942	13.7101	0	0	0	0	1	0	0	1
517	2016	K	0	0	0	0	0	9.51412	23.1308	0.471249	0.0156433	6.1413	0.243126	0.776068	0.488975	0.000413005	0.000455214	13.7101	0	0	0	0	1	0	0	1
517	2017	K	0	0	0	0	0	10.3142	23.3031	0.679632	0.0445682	6.1359	0.24869	0.776068	0.682122	0.000180434	0.000502118	13.7101	0	0	0	0	1	0	0	1
517	2018	K	0	0	0	0	0	10.0969	23.9144	0.907926	0.029226	6.1359	0.341471	0.776068	0.333547	0.000336902	0.000419144	14.0779	0	0	0	0	1	0	0	1
517	2019	K	0	0	0	0	0	10.3537	24.4125	0.961928	0.0545924	29.6871	0.416086	0.827469	0.438359	0.000266999	0.0006041	14.0779	0	0	0	0	1	0	0	1
517	2020	K	0	0	0	0	0	10.9443	24.9394	1.01511	0.0329879	28.6977	0.265941	0.817576	0.328602	0.000171174	0.000333005	14.1156	0	0	0	0	1	0	0	1
517	2021	K	0	0	0	0	0	11.4242	25.1471	1.07012	0.0153376	28.6977	0.183436	0.817576	0.278059	0.000153929	0.000259882	14.1156	0	0	0	0	1	0	0	1
517	2022		0	0	0	0	0	11.1641	25.0183	1.01512	0.0104783	28.9069	0.199804	0.795345	0.252896	0.000185718	0.000378241	14.1156	0	0	0	0	1	0	0	1
518	2012	C27	0	0	0	0	0	6.60852	20.6321	0.224458	0.0153818	0	0.488774	0.088795	5.33932	0.00272049	0.244936	13.6292	0	1	0	0	1	1	0	0
518	2013	C27	0	0	0	0	0.693147	6.4096	20.528	0.235745	-0.114628	0	0.502584	0.088795	4.70333	0.0041626	0.254815	13.6292	0	1	0	0	1	1	0	0
518	2014	C27	0	0	0	0	0.693147	6.51071	20.5225	0.142308	-0.0111982	0	0.592863	0.091457	3.34375	0.00305804	0.30759	14.0969	0	1	0	0	1	1	0	0
518	2015	C27	0	0	0	0	0	6.47409	20.5424	0.110745	-0.136636	0	0.621541	0.151263	1.10329	0.0035512	0.313881	14.0969	0	1	0	0	1	1	0	0
518	2016	C27	0	0	0	0	0	6.82449	20.7405	0.106546	0.00605724	0	0.654204	0.206293	0.528779	0.00253873	0.234741	14.0969	0	1	0	0	1	1	0	0
518	2017	C27	0	0	0	0	0	7.2637	20.6524	0.127653	0.0109291	0	0.760593	0.296949	0.731368	0.00230674	0.0787612	14.0969	0	1	0	0	1	1	0	0
518	2018	C27	0	0	0	0	0	7.34834	20.6463	0.240782	-0.0319964	0	0.751298	0.296949	0.646573	0.00205196	0.0899176	14.0624	0	1	0	0	1	1	0	0
518	2019	C27	0	0	0	0	0	7.40581	20.6353	0.229373	0.019	0	0.744183	0.272049	0.785586	0.00192289	0.0883683	14.0624	0	1	0	0	1	1	0	0
518	2020	C27	0.693147	1	0	0	0.693147	7.64578	20.5293	0.152259	0.0317976	0	0.578675	0.271396	1.59664	0.00157111	0.0871327	14.0624	0	1	0	0	1	1	0	0
518	2021	C27	0.693147	1	0	0	0	7.35796	20.4993	0.205491	-0.047161	0.0001	0.694181	0.307655	1.56929	0.00198005	0.0721615	14.152	0	1	0	0	1	1	0	0
518	2022		0	0	0	0	0.693147	7.13069	20.4196	0.216558	-0.0693136	0	0.71035	0.349482	1.34279	0.00241157	0.069793	14.152	0	1	0	0	1	1	0	0
519	2012	C34	0	0	0	0	0	6.78244	19.9771	0.198843	0.00738932	0	0.157407	0.307407	1.34585	0.0011557	0.275429	12.6115	1	1	0	1	0	0	0	1
519	2013	C30	0	0	0	0	0	7.88441	22.3163	0.771239	0.140763	0	0.370357	0.486705	1.59256	0.000918971	0.302945	13.4588	1	0	0	1	0	0	1	0
519	2014	C30	0	0	0	0	0	7.83443	22.3142	0.654587	0.0805438	0	0.362413	0.480006	1.60443	0.000885726	0.331902	13.4588	1	0	0	1	0	0	1	0
519	2015	C30	0	0	0	0	0	7.52188	22.3634	0.465086	0.0448653	0	0.359506	0.480006	1.28726	0.00124281	0.349322	13.653	1	0	0	1	0	0	1	0
519	2016	C30	0	0	0	0	0.693147	8.24152	23.0516	0.693707	0.0201506	0	0.213821	0.442525	1.64624	0.0012651	0.247496	14.0779	1	0	0	1	0	0	1	0
519	2017	C35	0	0	0	0	0	8.50035	22.9983	0.788146	0.0120319	0	0.190972	0.431596	2.44492	0.00116577	0.250214	14.0779	1	1	0	1	0	1	0	0
519	2018	C35	0	0	0	0	0	8.57313	23.0672	0.953702	0.0345055	0.0008	0.231306	0.431596	2.39231	0.000736012	0.213153	14.0779	1	1	0	1	0	1	0	0
519	2019	C35	0	0	0	0	0	8.64335	23.1222	0.871546	0.0238147	0.0008	0.212476	0.398824	2.32214	0.000760137	0.200391	14.0779	1	1	0	1	0	1	0	0
519	2020	C35	0	0	0	0	0	8.79889	23.222	0.69135	0.0236915	0.0008	0.175783	0.398824	2.01532	0.000660214	0.205953	14.0779	1	1	0	1	0	1	0	0
519	2021	C35	0	0	0	0	0	8.91738	23.3645	0.332973	0.0370521	0	0.20743	0.335338	1.87551	0.000696176	0.198792	13.9108	1	1	0	1	0	1	0	0
519	2022	C35	0	0	0	0	0	8.78476	23.4315	0.460391	0.0564217	0	0.288775	0.35365	1.87523	0.000863457	0.199888	13.9108	1	1	0	1	0	1	0	0
520	2012	G	0	0	0	0	0	7.64805	22.3807	0.662919	-0.269433	0	-0.244144	0.281462	0.323166	0.000653372	0.734131	13.7642	1	0	0	1	0	0	1	0
520	2013	G	0	0	0	0	0	7.9687	20.3421	0.090684	-1.56132	0	-0.157623	0.295595	0.0523854	0.00245439	0.483872	13.7642	1	0	0	1	0	0	1	0
520	2015	G	0	0	0	0	0	7.85615	20.0564	0.040824	0.239659	0	0.140048	0.225452	1.79238	0.000866341	0.22497	13.039	0	0	0	1	0	0	1	0
520	2016	G	0	0	0	0	0	7.85438	20.0842	0.063916	0.0186652	0	0.188963	0.225452	1.90502	0.000858687	0.173848	13.039	0	0	0	1	0	0	1	0
520	2017	G	0	0	0	0	0	8.14185	20.0712	0.121935	0.0969165	0.0114	0.164392	0.225443	2.52504	0.000834481	0.116776	13.039	0	0	0	1	0	0	1	0
520	2018	G	0	0	0	0	0	7.68976	20.26	0.198733	0.106446	0.0015	0.192674	0.225857	1.18283	0.000955069	0.528506	13.1022	0	0	0	1	0	0	1	0
520	2019	G	0	0	0	0	0	7.63309	20.2493	0.138813	0.0513586	0.0015	0.123262	0.32014	1.36085	0.000758872	0.566498	13.1022	0	0	0	1	0	0	1	0
520	2020	G	0	0	0	0	1.09861	7.48877	20.2669	0.173402	0.0167648	0.0005	0.117106	0.358855	1.02277	0.000829861	0.660936	13.1022	0	0	0	1	0	0	1	0
520	2021	G	0	0	0	0	0.693147	7.79137	20.507	0.214315	0.133672	0.0005	0.216095	0.333703	1.20299	0.000675472	0.628097	13.2177	0	0	0	1	0	0	1	0
520	2022		0	0	0	0	0	7.90642	20.4656	0.219653	0.0459028	0.0005	0.0897077	0.334153	1.2922	0.00042849	0.62474	13.2177	0	0	0	1	0	0	1	0
521	2012	C38	0.693147	1	0	0	1.38629	9.30389	22.7884	1.03117	0.0208123	0	0.237758	0.316144	0.999604	0.000373826	0.157731	13.473	1	1	0	1	0	1	0	0
521	2013	C38	0.693147	1	0	0	2.19722	9.4677	22.8659	0.965181	0.0336581	0.254	0.241407	0.30302	1.02898	0.000381055	0.133622	13.5008	1	1	0	1	0	1	0	0
521	2014	C38	0.693147	1	0	0	1.38629	9.45944	22.9215	0.88906	0.0319895	0.492	0.235082	0.311386	1.02739	0.00043499	0.135838	13.5278	1	1	0	1	0	1	0	0
521	2015	C38	0	0	0	0	1.79176	9.40083	22.9278	0.843075	0.00234799	0.6439	0.201274	0.311386	1.08493	0.000402934	0.134657	13.8643	1	1	0	1	0	1	0	0
521	2016	C38	0	0	1.79176	1	1.79176	9.58541	23.2496	0.924345	0.0204108	0.4707	0.199439	0.294559	1.21486	0.000376912	0.0962692	13.9108	1	1	0	1	0	1	0	0
521	2017	C38	0.693147	1	2.19722	1	1.79176	9.83788	23.4934	1.01075	0.0025357	0.4816	0.178287	0.300044	1.01692	0.000295838	0.0901811	13.9978	1	1	0	1	0	1	0	0
521	2018	C38	0.693147	1	1.38629	1	2.07944	9.82869	23.4681	1.14837	0.0022127	0.4874	0.186606	0.313062	1.00334	0.000181769	0.111424	14.0387	1	1	0	1	0	1	0	0
521	2019	C38	0.693147	1	0.693147	0	1.94591	9.72518	23.3767	1.14074	0.00292381	0.3431	0.187127	0.309553	1.07533	0.000199772	0.153537	14.0387	1	1	0	1	0	1	0	0
521	2020	C38	0.693147	1	0.693147	0	1.79176	9.61874	23.5023	0.959105	-0.00522162	0.3431	0.16488	0.309553	0.946576	0.000182119	0.148532	14.0855	1	1	0	1	0	1	0	0
521	2021	C38	0	0	2.07944	1	2.07944	9.80472	23.4439	1.10384	0.00556612	0.3431	0.119959	0.309553	0.968027	0.000184988	0.151616	14.0855	1	1	0	1	0	1	0	0
521	2022	C38	0	0	1.38629	1	2.30259	9.91627	23.5083	1.10457	0.0176547	0.3346	0.13706	0.313964	0.981692	0.000177384	0.137624	14.1376	1	1	0	1	0	1	0	0
523	2012	C26	0	0	0	0	1.09861	9.21515	21.3333	0.565979	0.0120424	0.0564	0.0597933	0.387971	1.29849	0.000224517	0.0714346	12.8992	1	1	0	0	1	0	1	0
523	2013	C26	0	0	0	0	2.70805	9.07585	21.6379	0.449262	0.0151293	0.0564	0.0629412	0.382538	0.91774	0.000230963	0.197827	12.9715	1	1	0	0	1	0	1	0
523	2014	C26	0	0	0	0	2.89037	9.38337	21.8257	0.472931	0.0145138	0.0602	0.052941	0.382538	0.813353	0.000173942	0.151932	13.2213	1	1	0	0	1	0	1	0
523	2015	C26	0	0	0	0	1.94591	9.72027	21.9845	0.385892	0.00907154	0.0866	0.0372441	0.391017	0.892287	0.000116384	0.126531	13.308	1	1	0	0	1	0	1	0
523	2016	C26	0	0	0	0	2.63906	9.96424	22.1512	0.540717	0.0101275	0.1122	0.030748	0.480864	1.20083	8.30873e-05	0.111213	13.308	1	1	0	0	1	0	1	0
523	2017	C26	0	0	0	0	2.07944	10.157	22.2945	0.710401	0.00752532	0.1197	0.0282354	0.482394	1.23904	8.53441e-05	0.0909443	13.5606	1	1	0	0	1	0	1	0
523	2018	C26	0	0	0	0	2.19722	9.45251	22.5497	0.899368	-0.0333245	0.1197	0.032702	0.46396	1.12123	0.000163688	0.066835	13.5861	1	1	0	0	1	0	1	0
523	2019	C26	0	0	0	0	1.94591	9.32766	22.6982	0.6962	-0.0164241	0.0635	0.0705875	0.461872	1.09836	0.000232998	0.0815079	13.6814	1	1	0	0	1	0	1	0
523	2020	C26	0	0	0	0	1.09861	8.78422	21.9469	0.36917	-0.894354	0.0308	0.0537376	0.478636	0.355985	0.000441481	0.16556	13.7101	1	1	0	0	1	0	1	0
523	2021	C26	0	0	0	0	0.693147	8.46513	21.7192	0.420881	0.469797	0.012	0.13125	0.519386	1.51835	0.00077412	0.293499	13.7953	1	1	0	0	1	0	1	0
523	2022	C26	0	0	0.693147	0	1.09861	8.4561	21.5731	0.344131	-0.028355	0.0105	0.0980959	0.394184	1.37391	0.000516199	0.315911	13.4588	1	1	0	0	1	0	1	0
524	2012	H	0	0	0	0	0	6.56968	20.4234	0.400587	0.0425058	0.0011	0.529422	0.52031	2.24416	0.00183675	0.537214	12.2356	1	0	0	0	1	0	0	0
524	2013	H	0	0	0	0	0	6.54829	20.4504	0.436146	0.0458296	0.0011	0.542832	0.528413	1.59467	0.00190337	0.499255	12.4292	1	0	0	0	1	0	0	0
524	2014	H	0	0	0	0	0	6.53058	20.4761	0.218363	0.0471615	0.0011	0.56622	0.545147	1.37496	0.00200994	0.458928	12.4292	1	0	0	0	1	0	0	0
524	2015	H	0	0	0	0	0	6.5705	20.553	0.15129	0.0483013	0.0011	0.569389	0.541445	3.12133	0.00204715	0.404239	12.5245	1	0	0	0	1	0	0	0
524	2016	H	0	0	0	0	0	6.56208	20.5642	0.194377	0.0360946	0.0011	0.547641	0.54489	1.54839	0.00239905	0.377834	12.5245	1	0	0	0	1	0	0	0
524	2017		0	0	0	0	1.60944	9.26324	22.2135	0.685104	0.070001	0	0.165586	0.723048	1.27074	0.000474413	0.128127	13.7101	1	0	0	0	1	0	0	0
524	2018		0	0	0	0	1.94591	9.37009	22.2457	0.847951	0.048325	0	0.153842	0.724975	1.8412	0.000438832	0.119049	13.7101	1	0	0	0	1	0	0	0
524	2019		0	0	1.09861	1	2.19722	9.46402	22.2854	0.837353	0.0617496	0.0136	0.138108	0.724975	1.66142	0.000391651	0.123239	13.9108	1	0	0	0	1	0	0	0
524	2020		0	0	0.693147	0	2.07944	8.05743	21.9814	0.547078	-0.0631599	0.0137	0.152308	0.730165	1.85918	0.00151574	0.152863	13.9108	1	0	0	0	1	0	0	0
524	2021	L	0	0	0.693147	0	1.79176	7.8734	21.8668	0.533391	-0.0434531	0.0137	0.194623	0.730165	2.06679	0.00176773	0.164755	13.7212	1	0	0	0	1	0	0	1
524	2022	L	0	0	0	0	1.60944	7.51046	21.8174	0.333231	-0.0622815	0.0253	0.144938	0.719332	1.58028	0.00257441	0.162475	13.784	1	0	0	0	1	0	0	1
526	2012	K	0	0	0	0	0	6.78333	19.1294	0.213194	0.0183098	0	0.203998	0.420517	2.3946	0.000894535	0.00413001	12.2061	0	0	0	0	1	0	0	1
526	2013	K	0	0	0	0	0	5.99873	19.1036	0.104776	-0.0331744	0	0.649938	0.40883	1.16896	0.0111906	0.0038122	12.2061	0	0	0	0	1	0	0	1
526	2014	K	0	0	0	0	0	4.61962	19.1178	0.106561	0.0101672	0	0.695695	0.402659	0.266519	0.00431189	0.418736	12.4292	0	0	0	0	1	0	0	1
526	2015	K	0	0	0	0	0	4.78744	19.6307	0.050762	-0.0502691	0.001	0.641447	0.433538	0.810841	0.00971163	0.231056	12.3458	0	0	0	0	1	0	0	1
526	2018		0	0	1.09861	1	0	8.75738	22.0185	0.685084	0.00283636	0	0.272718	0.34133	0.435538	0.00125005	0.04037	14.5574	1	0	0	0	1	0	0	1
526	2019		0	0	1.79176	1	0	8.81692	22.0032	0.553539	0.00339818	0	0.272822	0.336866	0.417206	0.00132562	0.0377837	14.152	1	0	0	0	1	0	0	1
526	2020		0	0	1.60944	1	0	8.52995	21.9803	0.417335	0.0120304	0	0.258261	0.395345	0.381103	0.00129749	0.0549176	14.152	0	0	0	0	1	0	0	1
526	2021		0	0	1.79176	1	0.693147	8.65269	21.9655	0.667127	-0.154419	0	0.261907	0.322939	0.421582	0.00137688	0.0511857	14.4521	0	0	0	0	1	0	0	1
526	2022		0	0	1.38629	1	0	8.36293	21.8806	0.654574	0.00250133	0	0.280368	0.333026	0.393724	0.00143129	0.0536409	14.4521	0	0	0	0	1	0	0	1
528	2012	C35	0	0	0	0	0	9.40681	23.8405	0.922053	0.0122999	0.002	0.166139	0.388713	1.19868	0.000668026	0.116102	13.7321	1	1	0	1	0	1	0	0
528	2013	C35	0	0	0	0	0	9.36579	23.8225	1.10914	0.0148244	0.0001	0.206625	0.378641	1.52027	0.000672222	0.138792	13.7321	1	1	0	1	0	1	0	0
528	2014	C35	0	0	0	0	0.693147	9.23089	23.7583	0.805317	0.00898793	0.0183	0.219356	0.374157	1.51641	0.000851118	0.12417	13.7321	1	1	0	1	0	1	0	0
528	2015	C35	0	0	0	0	0	8.83552	23.738	0.97973	0.00100835	0.0183	0.255271	0.394564	1.48317	0.00109556	0.119097	13.7321	1	1	0	1	0	1	0	0
528	2016	C35	0	0	0	0	0	8.89088	23.7478	1.03115	0.00232225	0.0184	0.248687	0.392787	1.13943	0.000973578	0.119838	13.7321	1	1	0	1	0	1	0	0
528	2017	C35	0	0	0	0	0	9.359	23.7986	0.978263	0.0152573	0.0184	0.229	0.395277	0.965133	0.000741018	0.114266	13.8155	1	1	0	1	0	1	0	0
528	2018	C35	0	0	0	0	0.693147	9.78787	23.9895	1.04874	0.0351354	0.0166	0.228121	0.403952	1.05411	0.000386259	0.104009	13.9377	1	1	0	1	0	1	0	0
528	2019	C35	0	0	0	0	1.09861	9.82493	24.1198	1.01989	0.0383002	0.1053	0.236623	0.408376	1.0828	0.000362838	0.0964551	13.9377	1	1	0	1	0	1	0	0
528	2020	C35	0	0	0	0	1.38629	9.96232	24.2499	1.03156	0.0421309	0.1053	0.203997	0.401966	0.854555	0.000306414	0.0902123	13.9377	1	1	0	1	0	1	0	0
528	2021	C35	0	0	0.693147	0	2.07944	10.0572	24.4229	1.13289	0.0273428	0.0846	0.174731	0.402571	1.0386	0.000306871	0.106397	14.4253	1	1	0	1	0	1	0	0
528	2022		0	0	0	0	1.60944	9.94297	24.4671	1.07057	0.0156453	0.0612	0.168021	0.386964	1.0012	0.000276683	0.115997	14.5333	1	1	0	1	0	1	0	0
529	2012	C13	0	0	0	0	1.94591	8.3622	20.9102	0.284721	0.0533727	0	0.127614	0.548343	1.45783	0.000469191	0.158063	13.2177	1	0	0	0	1	0	0	1
529	2013	C13	0	0	0	0	1.09861	8.5142	20.9891	0.312838	0.0639612	0	0.129815	0.545069	1.37199	0.000438862	0.149313	13.2177	1	0	0	0	1	0	0	1
529	2014	C13	0	0	0	0	1.60944	8.52924	21.1105	0.265368	0.110527	0	0.113305	0.545069	2.08551	0.000335096	0.122239	13.0552	1	0	0	0	1	0	0	1
529	2015	C13	0	0	0	0	2.56495	8.60401	21.0955	0.202076	0.0508881	0	0.120752	0.545069	2.48224	0.000350036	0.119302	12.99	1	0	0	0	1	0	0	1
529	2016	C13	0	0	0	0	3.91202	8.67046	21.1858	0.224637	0.0708194	0	0.139121	0.54525	2.58592	0.000379761	0.111106	13.2177	1	0	0	0	1	0	0	1
529	2017	C13	0	0	0	0	2.70805	8.79104	21.4377	0.454574	0.0858631	0	0.133299	0.548671	2.18307	0.00036882	0.0830091	13.9377	1	0	0	0	1	0	0	1
529	2018	C13	0	0	0	0	2.56495	8.79203	21.4692	0.673494	0.0921944	0	0.216389	0.545009	2.45264	0.000574899	0.082525	13.9377	1	0	0	0	1	0	0	1
529	2019	C13	0	0	0	0	2.63906	9.00295	21.6662	0.543817	0.122533	0	0.234674	0.552793	2.88643	0.000671148	0.0643107	13.9377	1	0	0	0	1	0	0	1
529	2020	C13	0	0	0	0	2.48491	9.13187	22.0399	0.666328	0.107224	0	0.205984	0.554029	2.05528	0.000691031	0.0416042	13.9377	1	0	0	0	1	0	0	1
529	2021	C13	0	0	0	0	2.07944	9.13504	22.2731	0.79311	0.0911685	0	0.182021	0.565115	1.80876	0.000569773	0.0420138	13.9377	1	0	0	0	1	0	0	1
529	2022		0	0	0	0	1.94591	9.02873	22.4682	0.738745	0.180286	0	0.101745	0.561157	1.8442	0.000482259	0.0534858	13.5008	1	0	0	0	1	0	0	1
530	2012	C34	0	0	0	0	0	8.03029	21.8007	0.961582	0.042079	0.0354	0.245623	0.327578	1.03	0.00121089	0.137878	13.5541	1	1	0	0	1	0	0	1
530	2013	C34	0	0	0	0	0	8.04664	21.8109	0.75621	0.0538435	0.0029	0.240089	0.339006	1.09641	0.00116178	0.133203	13.5541	1	1	0	0	1	0	0	1
530	2014	C34	0	0	0	0	0	7.96374	21.8397	0.722176	0.0380379	0.004	0.237891	0.333726	1.0911	0.00130251	0.135659	13.5541	1	1	0	0	1	0	0	1
530	2015	C34	0	0	0	0	0	8.0687	22.13	0.617208	0.0367733	1.0243	0.185176	0.340964	0.881364	0.00116357	0.110204	13.5541	1	1	0	0	1	0	0	1
530	2016	C34	0	0	0	0	0	8.13417	22.3294	0.719471	0.0401345	0.982	0.180333	0.313266	1.28077	0.00112932	0.102222	13.8832	1	1	0	0	1	0	0	1
530	2017	C34	0	0	0	0	0	8.13741	22.4495	0.918755	0.0385841	0.8118	0.209674	0.298623	1.06721	0.00111239	0.158529	13.8832	1	1	0	0	1	0	0	1
530	2018	C34	0	0	0.693147	0	1.09861	8.06494	22.4404	1.20822	0.0200249	0.6264	0.160105	0.293173	1.14239	0.000992032	0.171202	13.8832	0	1	0	0	1	0	0	1
530	2019	C34	0	0	0	0	1.38629	7.98873	22.4326	1.12379	0.0155267	0.4837	0.17157	0.297548	0.961328	0.00101393	0.17961	13.8832	1	1	0	0	1	0	0	1
530	2020	C34	0	0	0	0	1.09861	7.91195	22.4605	1.02999	0.00407775	0.4611	0.170642	0.297861	0.924905	0.000928028	0.156849	13.8832	1	1	0	0	1	0	0	1
530	2021	C34	0	0	0	0	0.693147	8.11412	22.47	0.889682	-0.0482064	0.4433	0.114721	0.297897	0.821799	0.000816642	0.149139	13.8832	1	1	0	0	1	0	0	1
530	2022	C34	0	0	0	0	0	8.35013	22.7517	1.00247	0.00298241	0.2642	0.122899	0.297849	0.962865	0.00064422	0.161673	13.8832	1	1	0	0	1	0	0	1
531	2012	D	0	0	0	0	0.693147	8.21894	22.7897	0.812829	0.0409506	0.0003	0.23216	0.58874	0.399013	0.000471322	0.426678	13.7483	1	0	0	0	1	0	1	0
531	2013	D	0	0	0	0	1.09861	8.2762	22.8501	0.856537	0.0457812	0.0003	0.300252	0.58874	0.4999	0.000464609	0.38177	13.7483	1	0	0	0	1	0	1	0
531	2014	D	0	0	0	0	0.693147	8.57009	22.7373	0.567858	0.0998743	0.0003	0.326109	0.58874	0.700572	0.000375305	0.412337	13.7483	1	0	0	0	1	0	1	0
531	2015	D	0	0	0	0	0.693147	7.88822	22.8482	0.649766	0.0618112	0.0003	0.318958	0.559751	0.532424	0.000644006	0.359964	13.7747	1	0	0	0	1	0	1	0
531	2017	D	0	0	0	0	0.693147	8.17467	22.9423	0.881951	0.0220174	0.0003	0.193457	0.579374	0.413662	0.000494812	0.329862	13.7747	1	0	0	0	1	0	1	0
531	2018	D	0	0	0	0	0.693147	8.24732	23.0558	1.0812	0.0105066	0	0.18209	0.579374	0.54592	0.000451674	0.272426	13.8451	1	0	0	0	1	0	1	0
531	2019	D	0	0	0	0	0.693147	8.26748	23.1767	0.992501	0.0395791	0	0.220528	0.579374	0.595081	0.000459137	0.257365	13.7429	1	0	0	0	1	0	1	0
531	2020	D	0	0	0	0	0	8.37261	23.3337	0.951548	0.0707095	0	0.27489	0.579374	0.554663	0.000513136	0.19135	13.8055	1	0	0	0	1	0	1	0
531	2021	D	0	0	0	0	0	8.42891	23.4948	0.966777	0.0120593	0	0.0515528	0.614381	0.626269	0.000383579	0.208169	13.8055	1	0	0	0	1	0	1	0
531	2022	D	0	0	0	0	0	8.39242	23.4307	1.03152	-0.00117327	0	-0.013852	0.614381	0.962373	0.000534013	0.259633	13.8055	1	0	0	0	1	0	1	0
532	2012	S	0	0	0	0	0	6.34441	20.6897	0.338298	0.0613571	0.0003	0.338809	0.274653	4.0098	0.00212232	0.210402	13.487	1	0	0	0	1	0	0	1
532	2013	S	0	0	0	0	0.693147	6.43728	20.8039	0.215413	0.0729693	0.0003	0.398467	0.39186	2.74238	0.00202542	0.176064	13.0815	1	0	0	0	1	0	0	1
532	2016	S	0	0	0.693147	0	1.09861	7.10495	21.3944	0.258852	0.034043	0	0.435988	0.393143	0.435869	0.0019573	0.0325713	13.5278	1	0	0	0	1	0	0	1
532	2017	S	0	0	0	0	1.09861	7.55347	21.572	0.460353	0.0301707	0	0.421172	0.393143	0.35229	0.00142961	0.0259785	13.5278	1	0	0	0	1	0	0	1
532	2018	S	0	0	0	0	1.09861	7.58436	21.6715	0.512429	0.0262786	0	0.455081	0.393143	0.42442	0.000959896	0.030216	13.5278	1	0	0	0	1	0	0	1
532	2019	S	0	0	0	0	1.09861	7.31136	21.6513	0.451465	0.0310128	0	0.419529	0.393143	0.434731	0.0010714	0.0397459	13.653	1	0	0	0	1	0	0	1
532	2021	S	0	0	0	0	1.09861	7.63868	21.7487	0.504249	0.0776245	0	0.444267	0.491825	0.539273	0.00130637	0.0359254	13.653	1	0	0	0	1	0	0	1
532	2022		0	0	0	0	1.09861	7.33029	21.6197	0.513093	0.0578536	0	0.368908	0.491825	0.645971	0.00130463	0.19043	13.653	1	0	0	0	1	0	0	1
533	2013	C38	0	0	0	0	0.693147	8.65458	22.0667	0.804503	0.0587301	0.0049	0.278088	0.406191	1.65435	0.000658277	0.0421992	13.5278	0	1	0	0	1	1	0	0
533	2015	C38	0	0	0	0	0	9.2292	22.1501	0.460864	0.0425979	0	0.317571	0.397932	1.58308	0.000657848	0.0376546	13.5278	0	1	0	0	1	1	0	0
533	2016	C38	0	0	0	0	0	9.16714	21.9046	0.326024	0.070526	0	0.325675	0.383877	2.05159	0.000709364	0.0712644	13.5278	0	1	0	0	1	1	0	0
533	2017	C38	0	0	0	0	1.09861	9.92093	22.1971	0.461245	0.0174767	0	0.0521723	0.383877	1.33341	0.000192361	0.0525229	13.5278	0	1	0	0	1	1	0	0
533	2018	C38	0	0	0	0	0.693147	10.0921	21.6357	0.756643	-0.357925	0	0.0340913	0.383877	1.25404	0.000141674	0.0895635	13.5278	0	1	0	0	1	1	0	0
533	2019	C38	0	0	0	0	0.693147	8.17548	21.5859	0.69987	-0.00421934	0	0.288385	0.387041	1.25655	0.000886731	0.0879812	13.5278	0	1	0	0	1	1	0	0
533	2020	C38	0	0	0	0	1.09861	8.26653	21.6171	0.68212	0.0355204	0	0.243726	0.387041	1.24672	0.000807455	0.0803207	13.5278	0	1	0	0	1	1	0	0
533	2021	C38	0	0	0	0	1.09861	8.27264	21.5882	0.496695	-0.00844171	0	0.225249	0.387041	1.11993	0.000859643	0.0779968	13.5278	0	1	0	0	1	1	0	0
533	2022	C38	0	0	0	0	1.09861	8.48353	21.6599	0.594206	0.0209265	0	0.20827	0.387041	1.11433	0.000674476	0.0687006	13.5278	0	1	0	0	1	1	0	0
534	2012	K	0	0	0	0	0	8.13994	21.814	0.82311	0.0610373	0.9474	0.506965	0.582479	0.392291	0.000549055	0.0077741	13.8155	0	0	0	0	1	0	0	1
534	2013	K	0	0	0	0	0	7.96085	21.886	0.90062	0.0490702	0.9394	0.488532	0.582479	0.850603	0.000532758	0.0963708	13.8155	0	0	0	0	1	0	0	1
534	2014	K	0	0	0	0	1.09861	7.22225	21.973	0.801315	0.0123452	0.7055	0.524154	0.584805	0.422007	0.0016952	0.086234	13.8155	0	0	0	0	1	0	0	1
534	2016	K	0	0	0	0	0	6.50858	21.5802	0.261946	0.025342	0.1071	0.356679	0.564006	1.35732	0.00312772	0.0513833	13.8155	0	0	0	0	1	0	0	1
534	2017	K	0	0	0	0	0	6.66218	21.6029	0.315177	0.0323966	0.1071	0.47663	0.582623	1.21005	0.00327073	0.0750894	13.8155	0	0	0	0	1	0	0	1
534	2018	K	0	0	0	0	0	6.67095	21.6795	0.419886	0.0169899	0.087	0.516335	0.583253	0.78286	0.0032152	0.0755302	13.9978	0	0	0	0	1	0	0	1
534	2019	C27	0	0	0	0	0	7.13071	21.447	0.363293	0.0222818	0.0752	0.879404	0.56282	1.15332	0.00198452	0.181988	13.9978	0	1	0	0	1	1	0	0
534	2020	C27	0	0	0	0	0	7.03431	21.4774	0.270509	0.0328738	0.0752	0.85011	0.564357	1.15135	0.00169258	0.24921	13.9978	0	1	0	0	1	1	0	0
534	2021	C27	0	0	0	0	0.693147	7.14305	21.4735	0.215081	0.0418884	0.1735	0.793563	0.496534	0.968505	0.00192811	0.293849	13.9978	0	1	0	0	1	1	0	0
534	2022	C27	0	0	0	0	1.09861	7.27724	21.6131	0.298455	0.0463776	0.3293	0.768501	0.362461	0.95622	0.00164313	0.291938	13.9978	0	1	0	0	1	1	0	0
536	2012	C39	0	0	0	0	0	7.67314	22.4794	0.731152	0.0699257	0.0001	0.356864	0.787969	1.11887	0.00115227	0.307613	13.8155	0	1	0	0	1	1	0	0
536	2013	C39	0	0	0	0	0	8.76172	22.9967	0.721593	0.0680372	0	0.28025	0.773693	1.18832	0.000573182	0.18295	14.221	0	1	0	0	1	1	0	0
536	2014	C39	0.693147	1	0	0	0	8.96352	23.0686	0.796171	0.037129	0	0.11506	0.692308	1.20506	0.000350047	0.203601	14.1802	0	1	0	0	1	1	0	0
536	2015	C39	0.693147	1	0	0	0	8.72874	22.9174	0.768439	0.0206706	0.0006	0.136307	0.682414	0.979699	0.000476464	0.21542	14.1303	0	1	0	0	1	1	0	0
536	2016	C39	0	0	1.09861	1	0	8.56763	23.6647	0.759998	0.0272761	0.0003	0.151401	0.561439	2.43683	0.000813271	0.0919759	14.074	0	1	0	0	1	1	0	0
536	2017	C39	0.693147	1	0.693147	0	0	8.29181	23.7687	0.972292	0.00993316	0	0.118691	0.538325	1.22524	0.000719278	0.32178	14.1082	0	1	0	0	1	1	0	0
536	2018	C39	0	0	0	0	0	8.09567	23.6724	1.09866	-0.24863	0	0.086013	0.538325	0.623164	0.000445736	0.526965	14.0545	0	1	0	0	1	1	0	0
536	2019	C39	0	0	0.693147	0	0	7.07175	23.4059	0.852921	-0.153807	0	-0.499953	0.528332	0.423745	0.00204966	0.578187	14.0144	0	1	0	0	1	1	0	0
536	2020	C39	0	0	0	0	0.693147	7.50189	23.2194	0.828925	0.0458454	0	-0.141513	0.41555	0.352206	0.000938612	0.625873	14.3461	1	1	0	0	1	1	0	0
536	2021	C39	0.693147	1	0.693147	0	1.79176	7.85708	23.1655	0.888447	-0.0173273	0	0.123233	0.388897	0.437458	0.000600924	0.587056	14.3163	1	1	0	0	1	1	0	0
536	2022	C39	0.693147	1	0.693147	0	1.38629	7.68773	22.949	0.890423	-0.117869	0	-0.158455	0.388897	0.690992	0.000920451	0.649288	14.2538	1	1	0	0	1	1	0	0
537	2012	K	0	0	0	0	0	9.95061	21.9123	0.593016	0.138433	0	0.545951	0.248646	0.662912	0.000218102	0.000532846	12.948	1	0	0	0	1	0	0	1
537	2013	K	0	0	0	0	0	9.70903	22.1467	0.829075	0.148466	0.0011	0.517971	0.25498	0.906279	0.000248011	0.000379986	13.017	1	0	0	0	1	0	0	1
537	2014	K	0	0	0	0	0	9.56907	22.2949	0.71316	0.0963684	0.0011	0.490718	0.231558	0.32627	0.000325068	0.000282675	13.017	1	0	0	0	1	0	0	1
537	2015	K	0	0	0	0	0	9.65975	22.802	0.710526	0.0379438	0.0028	0.520099	0.245367	0.238729	0.000627231	0.000347823	13.017	1	0	0	0	1	0	0	1
537	2016	K	0	0	0	0	0	10.4625	23.6333	0.930248	0.0407881	0	0.330224	0.241716	0.238227	0.000188059	0.000215145	12.7068	1	0	0	0	1	0	0	1
537	2017	K	0	0	0	0	1.09861	10.3327	25.0083	0.959319	0.0503563	0	0.278721	0.788148	0.188938	0.000151549	0.0201827	13.6292	1	0	0	0	1	0	0	1
537	2018	K	0	0	0	0	1.09861	10.4861	25.0534	0.990715	0.0336893	0	0.328114	0.794684	0.149503	0.000117007	0.0240024	13.7642	1	0	0	0	1	0	0	1
537	2019	K	0	0	0	0	1.60944	10.3387	24.9705	0.997322	0.0430813	0	0.383062	0.793622	0.166231	0.000166882	0.0231345	13.8643	1	0	0	0	1	0	0	1
537	2020	K	0	0	0	0	1.60944	10.2266	25.0386	1.04788	0.0305576	0	0.299569	0.790118	0.367557	0.000218401	0.0189002	13.2534	1	0	0	0	1	0	0	1
537	2022	K	0	0	0	0	1.09861		24.3487	0.843611	0.0121811	0	0.534156	0.775001	3.38685	0.00102668	0.54211	14.0779	1	0	0	0	1	0	0	1
538	2012	C27	0	0	0	0	2.70805	9.70506	23.0901	0.209733	0.160215	0.0044	0.300204	0.632095	1.28856	0.000259648	0.117366	13.7101	1	1	1	0	0	1	0	0
538	2013	C27	0	0	0	0	2.63906	9.94513	23.279	0.172532	0.197194	0.0044	0.296963	0.632095	1.67692	0.000292064	0.0985774	13.7101	1	1	1	0	0	1	0	0
538	2014	C27	0	0	0	0	2.94444	10.0084	23.517	0.230781	0.170919	0.0044	0.30164	0.620092	2.30462	0.000293204	0.101104	13.8643	1	1	1	0	0	1	0	0
538	2015	C27	0	0	0	0	2.70805	10.0919	23.6829	0.237021	0.154668	0.0009	0.305342	0.619134	2.41196	0.000237827	0.085025	13.8643	1	1	1	0	0	1	0	0
538	2016	C27	0	0	0	0	2.56495	10.1422	23.9255	0.27925	0.133594	0.0009	0.298639	0.619134	2.24952	0.000215765	0.0724914	14.2538	1	1	1	0	0	1	0	0
538	2017	C27	0	0	1.38629	1	2.83321	10.2311	24.0448	0.239718	0.119816	0.0009	0.311872	0.609791	2.18494	0.000159066	0.0630041	14.2538	1	1	1	0	0	1	0	0
538	2018	C27	0	0	1.38629	1	2.70805	10.333	24.137	0.347265	0.113283	0.0009	0.305478	0.609127	1.69732	0.000116843	0.0564657	14.2538	1	1	1	0	0	1	0	0
538	2019	C27	0	0	1.60944	1	2.48491	10.3916	24.6284	0.580466	0.10428	0.7104	0.285636	0.576813	3.42756	0.000322761	0.04045	14.4361	1	1	1	0	0	1	0	0
538	2020	C27	0	0	2.07944	1	2.30259	10.365	24.7346	0.523158	0.105095	0.7104	0.277524	0.576813	2.4475	0.00026279	0.0560815	14.4574	1	1	1	0	0	1	0	0
538	2021	C27	0	0	2.3979	1	2.70805	10.4778	24.6801	0.536158	0.0520189	0.8901	0.271499	0.574425	2.91899	0.000296768	0.056813	14.4574	1	1	1	0	0	1	0	0
538	2022	C27	0	0	2.70805	1	2.63906	10.5021	24.6996	0.490192	0.0537887	0.8583	0.263231	0.574085	2.04183	0.000228507	0.0510738	14.6858	1	1	1	0	0	1	0	0
539	2012	D	0	0	0	0	0.693147	9.7218	24.9085	0.985159	0.0512145	0.0001	0.208681	0.715096	0.383403	0.000294655	0.585145	14.8646	1	0	0	0	1	0	1	0
539	2013	D	0	0	0	0	0.693147	9.5761	24.9416	1.0595	0.0650055	0.0001	0.264231	0.715096	0.486336	0.000307589	0.611378	14.4574	1	0	0	0	1	0	1	0
539	2014	D	0	0	0	0	0.693147	9.53223	24.9586	0.969656	0.0631918	0.0001	0.279085	0.715105	0.576716	0.00031074	0.566902	14.4574	1	0	0	0	1	0	1	0
539	2015	D	0	0	0	0	0	9.37089	24.9988	0.961338	0.0656736	0.0001	0.29817	0.723856	0.588388	0.000358321	0.616382	14.5407	1	0	0	0	1	0	1	0
539	2016	D	0	0	0	0	0	9.26728	24.9814	1.03746	0.0180377	0.0001	0.215487	0.723856	0.581968	0.000342082	0.591631	14.9141	1	0	0	0	1	0	1	0
539	2017	D	0	0	0	0	0	9.42843	24.986	1.06712	0.0160599	0.0001	0.125789	0.723856	0.521506	0.000245835	0.577351	14.9533	1	0	0	0	1	0	1	0
539	2018	D	0	0	0	0	0.693147	9.45911	25.0182	1.09546	0.0126107	0.0001	0.115358	0.724449	0.55231	0.000251145	0.561268	15.0185	1	0	0	0	1	0	1	0
539	2019	D	0	0	0	0	0	9.54755	25.047	1.14648	0.0242897	0.0001	0.166193	0.724449	0.482184	0.000297901	0.510861	15.0155	1	0	0	0	1	0	1	0
539	2020	D	0	0	0	0	0	9.45159	25.1773	1.15206	0.0326464	0.0001	0.206741	0.721024	0.471112	0.000295078	0.548968	15.0937	1	0	0	0	1	0	1	0
539	2021	D	0	0	0	0	0	9.81398	25.4618	1.03188	-0.0446728	0	-0.0599444	0.714069	0.52663	0.000249308	0.498315	15.532	1	0	0	0	1	0	1	0
539	2022	D	0	0	0	0	0.693147	9.96221	25.6023	1.0207	-0.0367407	0	-0.00363118	0.714075	0.534117	0.000226449	0.474511	15.8937	1	0	0	0	1	0	1	0
541	2012	C38	0.693147	1	0	0	0	8.17793	21.9611	0.582602	0.121211	0.1475	0.259539	0.254583	3.69357	0.0007589	0.156352	13.487	0	1	0	0	1	1	0	0
541	2013	C38	1.38629	1	0	0	0	8.33749	21.9393	0.552951	0.0739616	0.045	0.251861	0.253091	3.48014	0.000791224	0.140122	13.9871	0	1	0	0	1	1	0	0
541	2014	C38	1.38629	1	0	0	0.693147	8.53684	22.0415	0.393544	0.0750064	0.0457	0.267736	0.258181	3.03854	0.00076983	0.123978	14.0135	0	1	0	0	1	1	0	0
541	2015	C38	0.693147	1	0	0	0	8.47105	22.523	0.313806	0.00770255	0.9078	0.240244	0.287152	2.75347	0.000839813	0.0800947	14.0135	1	1	0	0	1	1	0	0
541	2016	C38	0.693147	1	0	0	0	8.63527	22.5316	0.495604	0.17669	0.9056	0.251983	0.290941	2.9753	0.000627997	0.0731139	14.0306	1	1	0	0	1	1	0	0
541	2017	C38	0.693147	1	0	0	1.09861	8.7351	22.4595	0.499912	0.126668	0.9164	0.226336	0.290941	3.34434	0.000562027	0.0851897	14.0779	1	1	0	0	1	1	0	0
541	2018	C38	0.693147	1	0	0	1.09861	8.71865	22.4439	0.718274	0.0673209	0.9302	0.231229	0.290941	2.293	0.00045732	0.0916413	14.0779	1	1	0	0	1	1	0	0
541	2019	C38	0.693147	1	0.693147	0	1.38629	8.55052	22.5438	0.841408	0.0515928	0.9423	0.232823	0.290941	2.59241	0.000434689	0.101994	14.0779	1	1	0	0	1	1	0	0
541	2020	C38	0.693147	1	0	0	1.60944	8.63581	22.8656	0.872168	0.0438488	0.8962	0.199909	0.327385	1.603	0.00041487	0.0804884	14.0779	1	1	0	0	1	1	0	0
541	2021	C38	0.693147	1	0	0	2.19722	8.6708	22.9953	0.943098	0.0293428	0.8962	0.169816	0.327385	1.22654	0.000432327	0.136405	14.2979	1	1	0	0	1	1	0	0
541	2022	C38	0.693147	1	1.09861	1	2.3979	8.96032	23.4503	1.21399	0.0280825	0.9172	0.175342	0.336364	1.10964	0.000465892	0.229481	13.8155	1	1	0	0	1	1	0	0
543	2012	D	0	0	0	0	0	8.62648	23.5704	0.986877	0.0235087	0.0006	0.101247	0.6214	0.355381	3.54094e-05	0.660295	13.3047	1	0	0	1	0	0	1	0
543	2013	D	0	0	0	0	0	9.04136	23.8066	1.09001	0.0971427	0	0.200683	0.539903	0.652577	4.44501e-05	0.670837	13.7978	1	0	0	1	0	0	1	0
543	2017	D	0	0	0	0	0	9.0367	24.0022	1.22051	0.00295684	0	0.0344199	0.479718	0.380861	3.59776e-05	0.522546	13.9928	1	0	0	1	0	0	1	0
543	2018	D	0	0	0	0	0	9.06077	24.0871	1.25212	0.0230728	0	0.0600843	0.48093	0.502116	3.68097e-05	0.608318	14.0779	1	0	0	1	0	0	1	0
543	2019	D	0	0	0	0	0	9.26194	24.2167	1.22754	0.0342708	0	0.0867757	0.593218	0.424552	3.13619e-05	0.502057	14.2076	1	0	0	1	0	0	1	0
543	2021	D	0	0	1.09861	1	1.09861	9.56206	24.4264	1.08608	-0.0591007	0	-0.0459087	0.590322	0.431595	3.14241e-05	0.360609	14.2375	1	0	0	1	0	0	1	0
544	2012	D	0	0	0	0	0	6.91082	21.0811	0.45739	0.0722607	0	0.316269	0.573194	1.42153	0.00122191	0.24428	12.3014	1	0	0	1	0	0	0	1
544	2017	D	0	0	0	0	0		22.6344	0.766271	0.0498916	0	0.380668	0.736829	2.52336	0.000700065	0.435359	12.7657	1	0	0	1	0	0	0	1
544	2018	D	0	0	0	0	0	7.11483	22.9301	1.07226	0.0524314	0	0.434087	0.754532	1.91736	0.000822334	0.331422	12.7657	1	0	0	1	0	0	0	1
544	2019	D	0	0	0	0	0	7.61153	23.1105	1.03167	0.0478748	0	0.41716	0.761014	1.90001	0.000574656	0.280842	12.7657	1	0	0	1	0	0	0	1
544	2020	D	0	0	0	0	0	7.85818	23.5075	1.00184	0.038231	0	0.378616	0.761014	0.927545	0.000565673	0.164562	12.7657	1	0	0	1	0	0	0	1
544	2021	D	0	0	0	0	0	8.90407	23.7812	1.04915	0.0288407	0	0.213564	0.761014	0.667992	0.00025711	0.123935	12.7657	1	0	0	1	0	0	0	1
544	2022	D	0	0	0	0	0	8.92253	24.0057	1.05521	0.0200261	0	0.231887	0.761014	0.956729	0.000278395	0.0959085	12.7657	1	0	0	1	0	0	0	1
545	2013	C26	0	0	0	0	0	7.48778	20.8832	0.594424	0.138861	0	0.194078	0.593211	1.33577	0.000871307	0.486355	13.0815	0	1	0	1	0	0	1	0
545	2014	C26	0	0	0	0	0	7.31788	21.4721	0.590137	0.025364	0	0.136443	0.451653	2.8659	0.000885955	0.260554	13.4298	0	1	0	1	0	0	1	0
545	2015	C26	0	0	0	0	0.693147	7.23025	21.6494	0.368422	0.0565522	0	0.154499	0.447249	1.80238	0.001073	0.235227	13.4298	0	1	0	1	0	0	1	0
545	2016	C26	0	0	0	0	0	7.40092	21.715	0.419934	0.046278	0	0.179091	0.400675	1.66329	0.000916151	0.467728	13.5411	0	1	0	1	0	0	1	0
545	2017	C26	0	0	0	0	0	7.91948	21.7357	0.485554	0.0608745	0	0.241815	0.400044	1.5865	0.00110159	0.444376	13.9978	0	1	0	1	0	0	1	0
545	2018	C26	0	0	0	0	0	8.00094	21.8632	0.756416	0.0347159	0	0.19315	0.400044	0.972921	0.000711366	0.376391	14.0624	0	1	0	1	0	0	1	0
545	2019	C26	0	0	0	0	0	8.0187	21.8518	0.774934	0.00804493	0	0.171972	0.400044	1.11053	0.000702233	0.380915	14.0624	0	1	0	1	0	0	1	0
545	2020	C26	0	0	0	0	0	8.00751	21.7837	0.646058	-0.083702	0	0.0852819	0.369979	1.12414	0.00072235	0.38954	14.0624	0	1	0	1	0	0	1	0
545	2021	C26	0	0	0	0	0	8.37356	21.8477	0.60316	0.0359742	0	0.204746	0.360586	1.20567	0.000664625	0.34332	14.0624	0	1	0	1	0	0	1	0
545	2022		0	0	0	0	0	8.32075	21.8495	0.6606	-0.0474078	0	0.0631654	0.359979	1.07675	0.000360792	0.322326	14.0624	0	1	0	1	0	0	1	0
546	2012	K	0	0	0	0	0	6.73665	19.8627	0.322468	0.0127691	0	0.308079	0.266682	0.414255	0.000867488	0.0371132	13.0157	0	0	0	1	0	0	0	1
546	2013	K	0	0	0	0	0	6.30264	19.4857	0.289687	0.0582305	0	0.198643	0.266406	1.0087	0.00227821	0.103745	13.017	0	0	0	1	0	0	0	1
546	2014	C30	0	0	0	0	0	7.36371	22.1317	0.854335	0.111873	6.6203	0.287559	0.612173	0.163579	0.000759263	0.679839	13.5924	0	0	0	1	0	0	1	0
546	2015	C30	0	0	0	0	0	7.73899	22.199	0.615588	0.0685863	6.901	0.333522	0.612574	0.648297	0.000652272	0.556152	13.7642	0	0	0	1	0	0	1	0
546	2016	C30	0	0	0	0	0	7.82299	22.3564	0.716429	0.0690556	6.754	0.369582	0.586806	0.820699	0.000522401	0.552085	13.8155	0	0	0	1	0	0	1	0
546	2017	C30	0	0	0	0	0	8.56792	22.8015	0.532337	0.0613158	4.2303	0.185648	0.485655	0.605784	0.000318743	0.419421	14.4833	0	0	0	1	0	0	1	0
546	2018	N	0	0	0	0	0	9.00053	22.8533	0.82358	0.0542766	0.3507	0.149445	0.483866	0.585793	0.000302882	0.433994	14.4833	0	0	0	1	0	1	0	0
546	2019	N	0	0	0	0	0	8.99652	22.9371	0.810697	0.0659142	0.0295	0.146187	0.429313	0.597306	0.000301521	0.438624	14.4833	0	0	0	1	0	1	0	0
546	2020	N	0	0	0	0	0	9.05787	23.0062	0.992159	0.0509723	0.0295	0.147168	0.420078	0.6944	0.000290816	0.411373	14.4833	0	0	0	1	0	1	0	0
546	2021	N	0	0	0	0	0	9.08307	23.1026	0.730773	0.000550123	8.4992	0.0888948	0.427487	0.640674	0.000308468	0.359252	14.5087	0	0	0	1	0	1	0	0
546	2022		0	0	0	0	0	9.02123	22.7878	0.693812	-0.050099	8.6778	0.00190921	0.418776	1.58633	0.000411342	0.191889	14.5087	0	0	0	1	0	1	0	0
547	2012	C39	0	0	0	0	0	7.27092	21.673	0.747624	0.061552	0.0052	0.405807	0.295212	5.6126	0.00212267	0.0339028	13.3047	0	1	0	0	1	1	0	0
547	2013	C39	0	0	0	0	0	7.35158	21.7661	0.697637	0.0577507	0.0051	0.337836	0.290127	3.04781	0.00218107	0.0540092	13.4588	0	1	0	0	1	1	0	0
547	2014	C39	0	0	0	0	0	7.73232	21.9711	0.277662	0.0725341	6.7521	0.358092	0.280563	4.48081	0.00199327	0.0539223	13.5278	0	1	0	0	1	1	0	0
547	2015	C39	0	0	0	0	1.09861	7.91348	22.638	0.348384	0.0421056	4.5811	0.47522	0.216622	3.93971	0.00224981	0.0355842	13.9377	1	1	0	0	1	1	0	0
547	2018	C39	0.693147	1	0.693147	0	1.09861	8.73568	22.9563	0.765576	0.059904	3.2885	0.325944	0.197904	2.04737	0.000712661	0.0660034	14.2342	1	1	0	0	1	1	0	0
547	2019	C39	0	0	1.60944	1	1.60944	8.83544	23.1084	0.658148	0.0715799	0.0925	0.366921	0.199319	1.89508	0.000677597	0.0651545	14.2342	1	1	0	0	1	1	0	0
547	2020	C39	0	0	1.09861	1	1.79176	8.93001	23.2438	0.322433	0.0749598	0.0925	0.375978	0.205004	1.91538	0.000666714	0.0544979	14.2342	1	1	0	0	1	1	0	0
547	2021	C39	0.693147	1	1.94591	1	1.94591	8.83626	23.3597	0.519828	0.0495148	0	0.336213	0.204784	1.42587	0.000791522	0.0507063	14.2342	1	1	0	0	1	1	0	0
547	2022	C39	1.60944	1	1.09861	1	1.60944	8.63481	23.4081	0.753806	0.00421271	0	0.273126	0.216788	1.53978	0.00105231	0.0501897	14.2342	1	1	0	0	1	1	0	0
548	2012	G	0	0	0	0	0	6.51917	21.4933	0.811971	0.0191527	0.0057	0.690511	0.310426	1.79033	0.00295806	0.121914	13.3047	1	0	0	1	0	0	0	1
548	2013	G	0	0	0	0	0	6.35758	21.3871	0.687559	0.00957244	0.0039	0.650799	0.320392	2.04382	0.00294987	0.125713	13.5278	1	0	0	1	0	0	0	1
548	2014	G	0	0	0	0	0	6.28705	21.3872	0.456561	0.00998808	0.0039	0.646237	0.324631	1.81361	0.00309371	0.132832	13.5278	1	0	0	1	0	0	0	1
548	2015	G	0	0	0	0	0	6.18555	21.4452	0.312941	0.00373029	0.0039	0.606929	0.322503	1.51001	0.00350836	0.113719	13.3847	1	0	0	1	0	0	0	1
548	2016	G	0	0	0	0	0	6.25737	21.5883	0.487945	0.0225622	0.0039	0.588603	0.333407	0.845785	0.00361598	0.124982	13.3847	1	0	0	1	0	0	0	1
548	2017	G	0	0	0	0	0	7.76465	21.4563	0.551806	0.0547883	0.0039	0.34032	0.333872	1.39967	0.00088844	0.148263	13.3847	1	0	0	1	0	0	0	1
548	2018	G	0	0	1.09861	1	0	6.61586	21.4804	0.795249	0.0146326	0.0039	0.59375	0.338686	1.16001	0.0023892	0.131934	13.3847	1	0	0	1	0	0	0	1
548	2019	G	0	0	0	0	0	6.58816	21.5467	0.844852	0.0207251	0.0072	0.615657	0.340594	0.910504	0.00253204	0.118086	13.415	1	0	0	1	0	0	0	1
548	2020	G	0	0	0	0	0	7.07013	21.5403	0.90853	0.0368207	0.0072	0.357375	0.337602	1.21023	0.00140966	0.0971537	13.415	1	0	0	1	0	0	0	1
548	2021	G	0	0	0	0	0	7.06456	21.7466	0.943688	0.0205655	0.0072	0.389332	0.344178	1.37861	0.00172811	0.0735352	13.415	1	0	0	1	0	0	0	1
548	2022	G	0	0	0	0	0	7.06824	21.9331	0.813231	0.0113963	0.0072	0.402468	0.338975	0.777275	0.00175947	0.056809	13.415	1	0	0	1	0	0	0	1
550	2012	C36	0.693147	1	0	0	0	9.78977	23.2967	0.685014	0.123525	0.0002	0.249909	0.736969	1.5297	0.000707741	0.175578	14.0931	1	1	0	1	0	1	0	0
550	2013	C36	0.693147	1	0	0	0	9.7685	23.5256	0.582899	0.116066	0.0002	0.256904	0.745382	1.21484	0.00081356	0.260143	14.4033	1	1	0	1	0	1	0	0
550	2014	C36	0	0	0	0	0	9.95193	23.6935	0.592179	0.117167	0.0002	0.252124	0.745382	1.27831	0.000836809	0.228464	14.4033	1	1	0	1	0	1	0	0
550	2015	C36	0.693147	1	0	0	0	9.88472	23.7702	0.649986	0.109604	0.0002	0.260795	0.756649	1.33759	0.000996586	0.222641	14.4033	1	1	0	1	0	1	0	0
550	2016	C36	0.693147	1	0	0	0	9.90839	23.9217	0.765529	0.0578782	0.0002	0.226073	0.756649	1.21242	0.000924324	0.228154	14.4574	1	1	0	1	0	1	0	0
550	2017	C36	0.693147	1	1.38629	1	1.09861	10.0459	23.996	1.02047	0.0271608	0.0002	0.201005	0.756649	1.16586	0.000862842	0.228796	14.4574	1	1	0	1	0	1	0	0
550	2018	C36	0.693147	1	1.79176	1	1.09861	9.96474	23.8759	1.06335	0.00368955	0.0001	0.135925	0.757474	0.971066	0.000282026	0.242726	14.4574	1	1	0	1	0	1	0	0
550	2019	C36	0.693147	1	1.94591	1	0.693147	10.0073	23.9137	1.06489	0.00619821	0.0001	0.159143	0.757474	0.977897	0.000327545	0.235178	14.5087	1	1	0	1	0	1	0	0
550	2020	C36	0.693147	1	1.60944	1	0	10.1731	24.0621	0.93825	0.0209855	0.0001	0.168518	0.753592	1.02514	0.000305884	0.183286	14.5087	1	1	0	1	0	1	0	0
550	2021	C36	0.693147	1	1.60944	1	0.693147	10.1948	23.9951	0.927615	0.0210532	0.0001	0.144908	0.745382	0.870587	0.000327137	0.228737	14.5087	1	1	0	1	0	1	0	0
550	2022	C36	1.09861	1	1.60944	1	0.693147	10.0721	24.0363	1.00785	0.0320609	0.0001	0.142458	0.745382	0.898842	0.000320524	0.198279	14.4253	1	1	0	1	0	1	0	0
551	2012	S	0	0	0	0	1.60944	8.01212	21.8964	0.745482	0.012296	0	0.226779	0.37993	0.791479	0.00136257	0.268687	13.9108	1	0	0	0	1	0	0	1
551	2013	S	0	0	0	0	0.693147	8.08519	21.9541	0.627409	0.0279678	0	0.244152	0.386649	0.817336	0.00129556	0.282867	14.152	1	0	0	0	1	0	0	1
551	2014	S	0	0	0	0	1.79176	8.12035	21.9117	0.594511	0.0234294	0	0.254715	0.387036	0.830274	0.00135079	0.290843	14.152	1	0	0	0	1	0	0	1
551	2015	S	0	0	0	0	0	8.08409	21.9227	0.481683	0.0188323	0	0.251169	0.404637	0.82695	0.00144935	0.269771	14.2855	1	0	0	0	1	0	0	1
551	2016	S	0	0	0	0	1.38629	8.16973	22.1123	0.649758	0.0292451	0	0.262386	0.404637	0.901108	0.00131578	0.207423	14.3461	1	0	0	0	1	0	0	1
551	2017	S	0	0	0	0	0.693147	8.30009	22.1625	0.781675	0.0328108	0	0.257137	0.418284	0.877902	0.0012223	0.200286	14.4033	1	0	0	0	1	0	0	1
551	2018	S	0	0	0	0	1.09861	8.45838	22.2003	0.962714	0.0362952	0	0.231912	0.432736	0.906669	0.000699576	0.183803	14.4033	1	0	0	0	1	0	0	1
551	2019	S	0	0	0	0	0.693147	8.51819	22.2577	0.943562	0.0435739	0	0.229529	0.438002	0.968834	0.000643615	0.202765	14.4033	1	0	0	0	1	0	0	1
551	2020	S	0	0	0	0	0	8.51845	22.3328	0.890182	0.0422369	0	0.214818	0.432737	1.0412	0.000659026	0.182608	14.1156	1	0	0	0	1	0	0	1
551	2021	S	0	0	0	0	0	8.64146	22.4172	0.790393	0.0376082	0	0.213792	0.447933	0.923226	0.000635523	0.174769	14.1939	1	0	0	0	1	0	0	1
551	2022		0	0	0	0	0	8.76205	22.5645	0.966458	0.0464048	0.092	0.205224	0.423334	0.983442	0.00064257	0.148942	14.1939	1	0	0	0	1	0	0	1
552	2012	B	0	0	0	0	0	8.5737	22.3492	0.816759	0.153818	0	0.303743	0.480972	0.661092	0.00112619	0.159075	13.3047	1	0	1	0	0	0	0	1
552	2013	B	0	0	0	0	0	8.49924	22.4698	0.716924	0.0792089	0	0.27567	0.741714	0.787449	0.000900121	0.136822	13.3047	1	0	1	0	0	0	0	1
552	2014	B	0	0	0	0	0	8.41032	22.5641	0.737571	0.055165	0	0.264338	0.742485	0.614285	0.000817539	0.116884	13.3047	1	0	1	0	0	0	0	1
552	2015	B	0	0	0	0	0	7.75614	22.9487	0.846916	0.023164	0	0.217947	0.543735	1.13481	0.000790633	0.368457	13.3047	1	0	1	0	0	0	0	1
552	2016	B	0	0	0	0	0	7.91072	22.9251	0.847737	0.0243147	0	0.206801	0.54286	1.37256	0.000558319	0.338584	13.3047	1	0	1	0	0	0	0	1
552	2017	B	0	0	0	0	0	8.20435	23.0069	0.924312	0.0586449	0	0.332558	0.54286	1.66008	0.000529712	0.317939	13.3047	1	0	1	0	0	0	0	1
552	2018	B	0	0	0	0	0	8.22542	23.0388	1.10771	0.0575166	0	0.287002	0.54286	1.86439	0.000496907	0.318277	13.3047	1	0	1	0	0	0	0	1
552	2019	B	0	0	0	0	0.693147	8.20868	23.1112	1.20866	0.0499905	0	0.279684	0.54286	2.0587	0.000558762	0.306426	13.3047	1	0	1	0	0	0	0	1
552	2020	B	0	0	0	0	0	8.1194	23.3291	1.09644	0.0364609	0.0012	0.302707	0.54286	3.98275	0.000601115	0.241646	13.3047	1	0	1	0	0	0	0	1
552	2021	B	0	0	0	0	0	8.40058	23.3914	1.05234	0.0518774	0.0012	0.305052	0.520318	3.07678	0.000439248	0.220409	13.3047	1	0	1	0	0	0	0	1
552	2022		0	0	0	0	0	8.99121	24.0257	1.25038	0.153633	0.0011	0.469433	0.484167	1.29663	0.000716562	0.297164	13.8451	1	0	1	0	0	0	0	1
553	2012	C26	0	0	0	0	0	8.11718	21.601	0.667836	0.0444546	0.0018	0.167469	0.212749	0.417903	0.000406609	0.544017	13.5924	1	1	0	1	0	0	1	0
553	2013	C26	0	0	0	0	0	8.39249	21.7196	0.404269	0.125145	0.0073	0.237822	0.335028	0.845133	0.00036755	0.488955	13.653	1	1	0	1	0	0	1	0
553	2014	C26	0	0	0	0	0	8.42986	21.7997	0.388424	0.174135	0.0073	0.299858	0.315112	1.40066	0.000400146	0.425596	13.653	1	1	0	1	0	0	1	0
553	2016	C26	0	0	0	0	0	7.85258	21.8168	0.374577	-0.0249876	0.0046	0.136712	0.314531	1.55875	0.00120869	0.537499	13.653	1	1	0	1	0	0	1	0
553	2017	C26	0	0	0	0	0	10.0255	24.4024	0.957429	0.0725785	0.0003	0.35331	0.828221	1.40252	0.000588496	0.155034	14.6264	1	1	0	1	0	0	1	0
553	2018	C26	0	0	0	0	0	10.0851	24.4801	1.01395	0.0582935	0.0002	0.333013	0.802814	1.36184	0.000348664	0.154852	15.0393	1	1	0	1	0	0	1	0
553	2019	C26	0	0	0	0	0	9.96452	24.5363	1.00876	0.00628914	0.0002	0.322303	0.802814	1.2733	0.000566812	0.15323	14.8802	1	1	0	1	0	0	1	0
553	2020	C26	0	0	0	0	0	10.0113	24.5692	1.08966	0.00766105	0.0003	0.294387	0.793156	1.30729	0.000366924	0.140512	14.8307	1	1	0	1	0	0	1	0
553	2021	C26	0	0	0	0	0	10.0217	24.64	1.04639	0.00336602	0.0003	0.245697	0.804466	1.15647	0.000351046	0.160214	14.9911	1	1	0	1	0	0	1	0
553	2022	C26	0	0	0	0	0.693147	10.1768	24.7834	1.05238	0.0112625	0.0003	0.251377	0.803607	0.782702	0.000376339	0.1544	14.9787	1	1	0	1	0	0	1	0
554	2012	F	0	0	0	0	0	9.05106	20.7205	0.473155	0.0245559	0.001	0.055617	0.273541	0.961035	9.53443e-05	0.337558	13.1224	1	0	0	0	1	0	0	1
554	2013	F	0	0	0	0	0	9.01243	20.843	0.505423	0.0118179	0.001	0.0522887	0.274336	0.57792	0.00013325	0.340312	13.4588	1	0	0	0	1	0	0	1
554	2014	F	0	0	0	0	0	9.00514	20.8137	0.312852	0.0057779	0.001	0.0613156	0.280312	0.640644	0.000143685	0.375144	13.4588	1	0	0	0	1	0	0	1
554	2015	F	0	0	0	0	0	8.70804	20.784	0.218673	0.00352978	0.001	0.0786213	0.265727	0.454249	0.000207544	0.413705	13.4588	1	0	0	0	1	0	0	1
554	2016		0	0	0	0	0	8.64642	20.8058	0.246389	0.00433095	0.001	0.0904497	0.270533	0.258826	0.000161982	0.427995	13.4588	1	0	0	0	1	0	0	1
554	2017		0	0	0	0	0	8.60376	20.8767	0.340964	0.00252846	0.001	0.0893169	0.267772	0.465543	0.000137994	0.423158	13.4588	1	0	0	0	1	0	0	1
554	2018	F	0	0	0	0	0	8.70185	20.9613	0.519125	0.00168687	0.001	0.0873645	0.275284	0.350527	0.000143305	0.429564	13.4588	1	0	0	0	1	0	0	1
554	2019	F	0	0	0	0	0	8.63537	20.9997	0.547225	0.00468568	0.001	0.0969423	0.268177	0.187778	0.000147381	0.42672	13.4588	1	0	0	0	1	0	0	1
554	2020	F	0	0	0	0	0	8.47906	21.1194	0.620835	0.00528638	0.001	0.112862	0.264783	0.490034	0.000179382	0.359791	13.4588	1	0	0	0	1	0	0	1
554	2021	F	0	0	0	0	1.09861	8.64884	21.1348	0.549831	0.00554324	0	0.105987	0.310954	0.347772	0.000190333	0.329514	13.4588	1	0	0	0	1	0	0	1
554	2022		0	0	0	0	1.09861	8.77989	21.3954	0.60134	0.00527219	0	0.0969461	0.30511	0.204198	0.000174739	0.22472	13.4588	1	0	0	0	1	0	0	1
555	2012	C39	0	0	0	0	0	6.42876	16.7575	0.024877	-0.398006	0	0.0309995	0.257122	0.168901	0.00144177	0.00297752	12.2061	1	1	0	0	1	1	0	0
555	2013	C39	1.09861	1	0	0	1.38629	9.79804	22.5205	0.760367	0.0800772	0	0.153607	0.712493	1.08936	0.000480912	0.0312552	13.4588	0	1	0	0	1	1	0	0
555	2014	I	1.09861	1	0	0	1.09861	9.67313	22.5801	0.688653	0.0461757	0	0.183198	0.680128	1.35876	0.000704417	0.0261805	14.2729	0	1	0	0	1	1	0	0
555	2015	I	0.693147	1	0	0	2.07944	9.71699	22.7209	0.449773	0.0540089	0	0.206573	0.662771	1.17618	0.000760977	0.0195447	13.6877	0	1	0	0	1	1	0	0
555	2016	I	1.09861	1	0.693147	0	3.09104	9.45944	22.9744	0.692076	0.0302463	0.8485	0.195371	0.619066	1.06878	0.000741167	0.0564847	14.0779	0	1	0	0	1	1	0	0
555	2017	I	1.09861	1	1.38629	1	3.43399	9.41818	23.0954	0.645927	0.0314702	1.6515	0.207922	0.614578	1.02685	0.000882129	0.058676	14.1662	0	1	0	0	1	1	0	0
555	2018	I	1.09861	1	2.48491	1	3.52636	9.57801	23.0932	0.734969	0.00441443	1.4596	0.186278	0.551961	1.06858	0.000525872	0.0498108	14.1662	0	1	0	0	1	1	0	0
555	2019	I	1.38629	1	2.56495	1	4.21951	9.70165	23.0987	0.550679	0.035573	1.2263	0.185716	0.521772	1.1004	0.000396666	0.0456243	14.4033	0	1	0	0	1	1	0	0
555	2020	I	1.38629	1	2.77259	1	4.51086	9.75119	23.2125	0.563425	0.0408976	0.3768	0.170913	0.516438	1.03594	0.000268598	0.0375924	14.5948	0	1	0	0	1	1	0	0
555	2021	I	1.38629	1	2.63906	1	4.61512	9.83382	23.2427	0.661013	0.0316949	0.4926	0.170922	0.514343	1.04998	0.00025737	0.0333765	14.581	0	1	0	0	1	1	0	0
555	2022	I	1.60944	1	1.79176	1	4.39445	9.89872	23.2442	0.736803	0.0166074	0.4185	0.152807	0.496548	1.19787	0.000222046	0.0317547	14.581	0	1	0	0	1	1	0	0
557	2014	C15	0	0	0	0	0		19.4357	0.064041	0.00372163	0	0.616696	0.16258	1.66943	0.00793428	0.0712866	12.8992	1	0	1	0	0	0	0	1
557	2015	C15	0	0	0	0	0	6.85041	22.4228	0.820657	0.0207081	0	0.407685	0.155274	0.961013	0.00238263	0.660568	12.8992	1	0	1	0	0	0	0	1
557	2016	G	0.693147	1	0	0	0	6.29535	22.3425	0.758928	0.00157086	0	0.282469	0.503033	0.751439	0.00258096	0.699425	12.8992	1	0	1	0	0	0	0	1
557	2018	G	0	0	0	0	0	6.79524	22.4765	0.994927	0.0272455	0	0.346786	0.500907	1.98812	0.000962931	0.581241	12.8992	1	0	1	0	0	0	0	1
557	2019	G	0	0	0	0	0	6.84153	22.3876	0.989384	0.00810306	0	0.313319	0.500907	4.15487	0.000790552	0.639956	12.8992	1	0	1	0	0	0	0	1
557	2020	G	0	0	0	0	0	6.96142	22.423	0.903574	0.0319277	0	0.33692	0.500907	4.8306	0.000788043	0.606577	12.8992	1	0	1	0	0	0	0	1
557	2021	G	0	0	0.693147	0	0	7.29369	22.476	0.883236	0.0401465	0	0.297943	0.492978	5.02232	0.000567828	0.557946	12.8992	1	0	1	0	0	0	0	1
557	2022	G	0	0	0	0	0	7.67166	22.5367	0.798964	0.03999	0	0.228623	0.48156	4.6063	0.00041908	0.509254	12.8992	1	0	1	0	0	0	0	1
558	2012	K	0	0	0	0	0	8.13244	22.4945	0.807511	0.00949219	0.0508	0.217103	0.675211	0.207627	0.000536099	0.0444434	13.5924	0	0	0	0	1	0	0	1
558	2013	K	0	0	0	0	0	8.70485	22.5581	0.840438	0.0100139	0.035	0.193162	0.675211	0.212088	0.000313925	0.0405531	13.653	0	0	0	0	1	0	0	1
558	2015	K	0	0	0	0	1.38629	8.92395	21.7638	0.124135	-0.0937996	0.0151	0.1142	0.604953	1.76331	0.000437233	0.0930503	13.7642	0	0	0	0	1	0	0	1
558	2017	K	0	0	0	0	1.38629	8.29143	21.6602	0.338225	0.0176422	0.0336	0.0896203	0.58401	0.830958	0.000521513	0.101779	13.7642	0	0	0	0	1	0	0	1
558	2018	K	0	0	0	0	0	7.68985	21.736	0.535593	-0.0204518	0.0288	0.340105	0.542353	0.753944	0.0010977	0.0843532	13.7642	0	0	0	0	1	0	0	1
558	2019	K	0	0	1.09861	1	0	6.02001	21.607	0.449228	0.00945466	0.008	0.189754	0.528546	1.17196	0.00501506	0.112199	13.981	1	0	0	0	1	0	0	1
558	2020	K	0	0	0.693147	0	0	6.06367	21.4961	0.478224	-0.031927	0.008	0.241514	0.498539	1.57215	0.00345112	0.123141	13.981	1	0	0	0	1	0	0	1
558	2021	K	0	0	0	0	0	5.94168	21.3731	0.332457	-0.0510174	0.0015	0.0840641	0.464858	0.615608	0.00392122	0.226841	13.981	1	0	0	0	1	0	0	1
558	2022		0	0	0	0	0	5.97321	21.3293	0.410314	-0.0199093	0.0015	0.289126	0.42627	0.635836	0.00300741	0.134734	13.981	1	0	0	0	1	0	0	1
559	2012	C36	0	0	0	0	0	9.05329	22.8708	0.729769	0.0439594	0.2555	0.168424	0.543713	1.28053	0.000769271	0.27875	14.221	0	1	0	0	1	1	0	0
559	2013	C36	0	0	0	0	0	9.11945	22.9998	0.678868	0.065947	0.2556	0.197785	0.543713	0.974731	0.000838905	0.267121	14.2855	0	1	0	0	1	1	0	0
559	2014	C36	0	0	0	0	0	9.16423	23.2001	0.394096	0.0722776	0.2556	0.222041	0.541402	1.06066	0.000880905	0.232115	14.2855	0	1	0	0	1	1	0	0
559	2015	C36	0	0	0	0	0	9.19439	23.2685	0.212464	0.068035	0.2559	0.21251	0.557525	1.1712	0.000786839	0.227098	14.2855	0	1	0	0	1	1	0	0
559	2016	C36	0	0	0	0	0	9.24489	23.1672	0.309892	0.0734005	0.256	0.219471	0.548787	0.945209	0.000808681	0.254813	14.2855	0	1	0	0	1	1	0	0
559	2017	C36	0	0	0	0	0	9.27489	23.1682	0.338288	0.0801438	0.0005	0.20666	0.616604	0.967151	0.000795713	0.263163	14.2855	0	1	0	0	1	1	0	0
559	2018	C36	0	0	0	0	1.94591	9.2894	23.2122	0.582555	0.0634923	0.0005	0.185972	0.615013	0.999937	0.000366595	0.257368	14.2855	0	1	0	0	1	1	0	0
559	2019	C36	0	0	0	0	1.60944	9.22225	23.2105	0.563	0.0453448	0.0005	0.175717	0.615013	1.00395	0.000432336	0.267636	14.2855	0	1	0	0	1	1	0	0
559	2020	C36	0	0	0	0	1.60944	9.26232	23.4635	0.677945	0.03224	0.0005	0.162369	0.667372	1.48251	0.000450125	0.199605	14.2855	0	1	0	0	1	1	0	0
559	2021	C36	0	0	0	0	1.60944	9.56514	23.5459	0.622125	0.0434052	0.0049	0.133056	0.672824	1.55185	0.000324457	0.16901	14.4414	0	1	0	0	1	1	0	0
559	2022	C36	0	0	0	0	0.693147	9.54549	23.6776	0.762556	0.0454187	0.0049	0.132434	0.667613	0.973405	0.000296228	0.139911	14.4414	0	1	0	0	1	1	0	0
560	2012	F	0	0	0	0	0.693147	8.67165	22.0974	0.981314	0.0390763	0	0.285827	0.451547	0.477104	0.000811589	0.0674681	13.3047	0	0	1	0	0	0	0	1
560	2013	F	0	0	0	0	1.94591	8.23679	22.295	0.983315	0.0214139	3.122	0.375504	0.437622	0.382116	0.00120684	0.0540002	13.3047	0	0	1	0	0	0	0	1
560	2014	F	0	0	0	0	3.2581	7.92704	22.2235	0.74068	0.0192403	2.3383	0.370467	0.460299	0.392308	0.00137244	0.131034	13.3047	0	0	1	0	0	0	0	1
560	2015	F	0	0	0	0	3.97029	7.96039	22.531	0.6717	0.0038233	0.0037	0.295442	0.388889	1.25943	0.0017431	0.054008	13.4588	0	0	1	0	0	0	0	1
560	2017	F	0.693147	1	0	0	3.46574	7.51301	23.5642	0.916255	0.00636185	6.1563	0.330003	0.300306	0.993692	0.000692067	0.0247235	14.8271	0	0	1	0	0	0	0	1
560	2018	K	0.693147	1	0.693147	0	2.48491	9.62084	23.6339	0.962134	0.0392035	5.5226	0.301958	0.337955	1.07209	0.000964538	0.0229012	15.1373	0	0	1	0	0	0	0	1
560	2019	K	0.693147	1	2.56495	1	2.19722	9.72652	23.6933	1.00778	0.0451779	5.5226	0.305197	0.337955	1.15258	0.000965069	0.0182586	14.0225	0	0	1	0	0	0	0	1
560	2020	K	1.09861	1	1.60944	1	1.79176	9.58831	23.7252	1.03849	0.0164014	5.5245	0.261651	0.331608	1.14033	0.0010439	0.0164478	13.9978	0	0	1	0	0	0	0	1
560	2021	K	0.693147	1	1.09861	1	1.38629	9.81473	24.2187	1.10625	0.00492702	5.9722	0.182152	0.331608	0.791337	0.00114784	0.00976186	14.4033	0	0	1	0	0	0	0	1
560	2022		0	0	0	0	1.60944	9.86627	24.2088	1.15196	-0.0101158	5.9726	0.0866322	0.326089	0.739793	0.000903139	0.00881221	15.1505	0	0	1	0	0	0	0	1
561	2012	C39	0	0	0	0	1.09861	7.74966	21.2077	0.624686	0.0210816	0.0049	0.360611	0.560219	1.54305	0.0028439	0.103508	13.017	1	1	1	0	0	1	0	0
561	2013	C39	0	0	0	0	0	7.63506	21.234	0.401253	0.0183013	0.0049	0.406736	0.558188	1.58528	0.00332305	0.0925345	13.1224	1	1	1	0	0	1	0	0
561	2014	C39	0	0	0	0	0	7.80074	21.3682	0.314703	0.0240425	0.0038	0.400688	0.567181	1.44546	0.00308947	0.0776727	13.1224	1	1	1	0	0	1	0	0
561	2015	C39	0	0	0	0	0	7.96534	21.5415	0.236901	0.0447516	0.0038	0.41104	0.571195	1.34891	0.00274866	0.0602553	13.1224	1	1	1	0	0	1	0	0
561	2016	C39	0	0	0	0	0	7.9081	21.5598	0.278069	0.0463364	0.0038	0.434609	0.576599	1.47329	0.00289418	0.0805335	13.1224	1	1	1	0	0	1	0	0
561	2017	C39	0	0	0	0	0	7.83791	21.7443	0.429	0.034973	0.1008	0.438132	0.558579	1.29491	0.00321556	0.114557	13.1224	1	1	1	0	0	1	0	0
561	2018	C39	0	0	0	0	0	7.88266	21.7909	0.610341	0.0348978	0.1021	0.440007	0.549747	1.34353	0.00195535	0.0960776	13.1224	1	1	1	0	0	1	0	0
561	2019	C39	0	0	0	0	0	8.01795	21.8951	0.53969	0.0316822	0.1021	0.372851	0.551526	1.46042	0.00156855	0.076111	13.3047	1	1	1	0	0	1	0	0
561	2020	C39	0	0	0	0	0	8.01605	21.9965	0.578363	0.0324352	0.1015	0.378994	0.561452	1.26044	0.00158779	0.0769033	13.3047	1	1	1	0	0	1	0	0
561	2021	C39	0	0	0	0	0.693147	7.88773	22.0814	0.547137	0.0306243	0.0894	0.416396	0.550946	1.10487	0.00167153	0.145434	13.3047	1	1	1	0	0	1	0	0
561	2022	C39	0	0	0	0	0	7.92323	22.1841	0.54906	0.0244853	0.0828	0.404711	0.483784	1.12039	0.00143204	0.144399	13.3047	1	1	1	0	0	1	0	0
565	2013	C26	0	0	0	0	0	7.24008	20.6923	0.567817	0.0363281	0	0.239306	0.418183	1.14076	0.0013949	0.236302	13.017	1	1	0	0	0	0	1	0
565	2014	C26	0	0	0	0	0	7.23828	20.6754	0.365434	0.0463794	0	0.227613	0.434857	1.35834	0.00122693	0.249431	13.017	1	1	0	0	0	0	1	0
565	2015	C26	0	0	0	0	0.693147	7.40956	20.7823	0.1567	0.143566	0	0.226816	0.414832	1.54315	0.0015668	0.220506	13.017	1	1	0	0	0	0	1	0
565	2016	C26	0	0	0	0	0.693147	8.69707	21.0104	0.229409	0.186741	0	0.0758402	0.415887	2.07405	0.000360421	0.182285	13.017	1	1	0	0	0	0	1	0
565	2017	C26	0	0	0	0	0.693147	9.12082	21.175	0.433321	0.0558771	0	0.0508338	0.417859	1.50619	0.000225239	0.159798	13.017	1	1	0	0	0	0	1	0
565	2018	C26	0	0	0	0	0.693147	7.41911	21.1077	0.656569	0.0297533	0	0.234348	0.418086	2.56612	0.00115784	0.149688	13.017	1	1	0	0	0	0	1	0
565	2019	C26	0	0	0	0	0	7.14726	21.1543	0.561162	0.043163	0	0.30663	0.418743	2.39089	0.0017658	0.134762	13.017	1	1	0	0	0	0	1	0
565	2020	C26	0	0	0	0	0	7.07716	21.1861	0.648918	0.0352214	0	0.337109	0.419573	2.35998	0.00182723	0.121769	13.1712	1	1	0	0	0	0	1	0
565	2021	C26	0	0	0	0	0	7.09134	21.1976	0.496712	0.0446051	0	0.277578	0.425929	2.32388	0.00206671	0.176133	13.3294	1	1	0	0	0	0	1	0
565	2022		0	0	0	0	0	7.05788	21.1996	0.563755	0.0326034	0	0.234282	0.417119	3.05034	0.00200534	0.172309	13.3375	1	1	0	0	0	0	1	0
566	2012	C27	0	0	0	0	0	7.64704	21.739	0.456354	0.0331	0.2176	0.417619	0.314005	1.75016	0.000915788	0.124822	13.3047	0	1	0	0	1	1	0	0
566	2013	C27	0	0	0	0	0	7.61292	21.968	0.479249	0.0326537	0.1875	0.422017	0.314723	1.00133	0.00102654	0.140048	13.3047	0	1	0	0	1	1	0	0
566	2014	C27	0	0	0	0	0.693147	7.81333	22.0244	0.387863	0.0477553	0.1862	0.410381	0.312505	1.36791	0.000891645	0.166256	13.653	0	1	0	0	1	1	0	0
566	2015	C27	0	0	0	0	2.07944	7.88751	22.3089	0.224026	0.0462137	0.1691	0.424055	0.377562	1.48835	0.000827291	0.184527	14.1376	0	1	0	0	1	1	0	0
566	2016	C27	0	0	0	0	1.60944	7.74907	22.9858	0.533532	0.021993	0.1344	0.523797	0.415339	2.14299	0.00113996	0.105655	14.1376	0	1	0	0	1	1	0	0
566	2018	C27	0	0	0	0	2.3979	8.15412	23.0589	0.861358	0.0097979	0.1344	0.533957	0.44084	1.28228	0.000978614	0.131418	14.3461	0	1	0	0	1	1	0	0
566	2019	C27	0	0	0	0	1.38629	8.13896	23.1007	0.780801	-0.0184385	0.1344	0.508747	0.349896	1.18934	0.0011516	0.123596	14.3461	0	1	0	0	1	1	0	0
566	2020	C27	0.693147	1	0	0	1.38629	7.90454	23.0534	0.577204	-0.0621729	0.0867	0.437119	0.422128	0.978825	0.00127387	0.187935	13.7684	1	1	0	0	1	1	0	0
566	2021	C27	0	0	0	0	1.09861	7.88043	22.847	0.677758	-0.171401	0.0282	0.403591	0.422757	0.695722	0.00124747	0.214838	13.7684	1	1	0	0	1	1	0	0
566	2022	C27	0	0	0	0	0	7.78298	22.7201	0.719125	0.000302267	0.0328	0.431819	0.417132	0.561963	0.00111271	0.217388	13.7684	1	1	0	0	1	1	0	0
568	2012	C15	0	0	0	0	1.09861	9.81136	23.4688	0.281798	0.323885	0.0959	0.656506	0.53507	1.70482	0.000461144	0.0640751	13.5278	1	0	1	0	0	0	0	1
568	2013	C15	0	0	0	0	0	9.67988	23.3432	0.438611	0.241409	0.1871	0.569831	0.53355	2.74762	0.000396087	0.0809158	13.5278	1	0	1	0	0	0	0	1
568	2014	C15	0	0	0	0	2.89037	9.01453	23.3013	0.412111	0.0725562	0.1642	0.476136	0.534031	2.12771	0.000869702	0.0824924	13.5278	1	0	1	0	0	0	0	1
568	2015	C15	0	0	0.693147	0	2.07944	9.2797	23.3021	0.322772	0.117691	0.0457	0.493961	0.542918	2.40041	0.000636022	0.0842478	13.5278	1	0	1	0	0	0	0	1
568	2016	C15	0	0	0	0	2.07944	9.42439	23.3388	0.280139	0.145198	0.0457	0.624332	0.55982	2.92143	0.000654965	0.0862063	13.5924	1	0	1	0	0	0	0	1
568	2017	C15	0	0	0	0	2.94444	9.63962	23.7067	0.202377	0.155671	0.0437	0.719302	0.527443	2.62337	0.000547823	0.0571932	13.5924	1	0	1	0	0	0	0	1
568	2018	C15	0	0	0	0	3.21888	9.87687	23.8414	0.348288	0.165742	0.0437	0.775266	0.542754	2.26463	0.000553369	0.0455505	13.5924	1	0	1	0	0	0	0	1
568	2019	C15	0	0	0	0	3.04452	9.94388	24.0878	0.212664	0.180194	0.0406	0.806194	0.537545	1.86715	0.000524087	0.0525196	13.7101	1	0	1	0	0	0	0	1
568	2020	C15	0	0	0	0	2.63906	9.55463	24.2789	0.102067	0.18641	0.0406	0.83045	0.533129	1.96113	0.000507093	0.196723	13.7101	1	0	1	0	0	0	0	1
568	2021	C15	0	0	0	0	2.89037	9.71949	24.4894	0.111713	0.202945	0.0399	0.856972	0.542177	1.76284	0.000511628	0.187206	13.7953	1	0	1	0	0	0	0	1
568	2022		0	0	0	0	1.94591	9.88447	24.6626	0.148647	0.220103	0.0688	0.865882	0.538853	2.22594	0.000462682	0.172349	13.7953	1	0	1	0	0	0	0	1
570	2012	C34	0	0	0	0	0	8.55365	21.86	0.783948	0.018547	0	0.103401	0.308951	1.1347	0.000479327	0.181629	13.4588	1	1	0	0	1	0	0	1
570	2013	C34	0	0	0	0	0	8.5185	21.8359	0.689171	0.0246154	0	0.135595	0.317805	1.16778	0.000564414	0.203615	13.4588	1	1	0	0	1	0	0	1
570	2014	C34	0	0	0	0	0	8.3826	21.876	0.589822	0.0211526	0	0.133638	0.315904	1.16423	0.000586404	0.180873	13.4588	1	1	0	0	1	0	0	1
570	2015	C34	0	0	0	0	0	8.38704	21.8965	0.503851	0.0226542	0	0.162546	0.320241	1.35646	0.000784503	0.171576	13.4588	1	1	0	0	1	0	0	1
570	2016	C34	0	0	0	0	0	8.29273	22.0383	0.618941	0.0183166	0	0.182394	0.33981	1.31287	0.00090924	0.148644	13.4588	1	1	0	0	1	0	0	1
570	2017	C34	0	0	0	0	0	8.35217	22.0388	0.8808	0.0126295	0	0.144289	0.313272	1.25233	0.000761321	0.150351	13.4588	1	1	0	0	1	0	0	1
570	2018	C34	0	0	0	0	0	8.25961	21.9891	1.06565	0.0172026	0	0.149861	0.313204	1.26411	0.000545696	0.144231	13.3047	1	1	0	0	1	0	0	1
570	2019	C34	0	0	0	0	0	8.25323	21.9728	0.982716	0.00710297	0	0.161934	0.313902	1.37347	0.000523095	0.131197	13.3047	1	1	0	0	1	0	0	1
570	2020	C34	0	0	0	0	0.693147	8.37649	22.0977	0.930436	0.0140544	0	0.150619	0.324682	1.19042	0.000380786	0.114897	13.3047	1	1	0	0	1	0	0	1
570	2021	C34	0	0	0.693147	0	1.38629	8.48067	22.3044	0.946853	0.0233582	0	0.149957	0.353849	1.48819	0.000403234	0.0828979	13.3047	1	1	0	0	1	0	0	1
570	2022	C34	0	0	1.09861	1	1.09861	8.2002	22.3756	1.08824	0.0157238	0	0.106948	0.334125	1.38105	0.000547703	0.13796	13.3047	1	1	0	0	1	0	0	1
572	2012	C36	0	0	0	0	0	9.02318	23.2641	1.4626	0.0318117	0	0.157473	0.412314	1.4764	0.000643013	0.233209	13.1224	0	1	0	0	1	1	0	0
572	2013	C36	0	0	0	0	0	9.17312	23.3496	1.29963	0.0423447	0	0.164213	0.412326	1.16193	0.00058035	0.239077	13.1616	0	1	0	0	1	1	0	0
572	2014	C36	0	0	0	0	0.693147	9.3539	23.5026	1.06981	0.0179529	0	0.156064	0.401679	0.909162	0.000605221	0.205562	13.2177	0	1	0	0	1	1	0	0
572	2015	C36	0	0	0	0	1.38629	9.35717	23.5796	0.955295	0.00608875	0.0036	0.155246	0.391955	0.820412	0.000655126	0.179364	13.2177	0	1	0	0	1	1	0	0
572	2016	C36	0	0	1.09861	1	0	9.48738	23.6246	1.04743	0.000728597	0.0003	0.136191	0.391955	0.600291	0.000680025	0.171276	13.2534	0	1	0	0	1	1	0	0
572	2017	C36	0	0	0.693147	0	0.693147	9.20306	23.4828	1.04875	-0.0832717	0.0003	0.0987232	0.39249	0.694737	0.00129774	0.160943	13.3375	0	1	0	0	1	1	0	0
572	2018	C36	0	0	0.693147	0	0.693147	8.52706	23.162	1.24708	-0.166843	0	0.0700661	0.385266	0.460032	0.00136393	0.266701	13.3535	0	1	0	0	1	1	0	0
572	2019	C36	0	0	1.09861	1	1.09861	8.51675	23.0962	1.3214	0.00879922	0	0.0523863	0.384749	0.541252	0.00111588	0.280833	13.3535	0	1	0	0	1	1	0	0
572	2020	C36	0	0	1.09861	1	0	7.33805	22.9434	0.94249	-0.128631	0	0.190694	0.38101	0.61504	0.00503207	0.29368	13.4588	0	1	0	0	1	1	0	0
572	2021	C36	0	0	1.09861	1	0.693147	7.67983	22.8283	0.618559	0.0154967	0	0.186761	0.384141	0.715607	0.00233953	0.271651	13.4588	0	1	0	0	1	1	0	0
572	2022		0	0	0	0	0	8.0546	22.5636	0.562706	-0.217198	0	0.0982362	0.363243	0.692447	0.00118966	0.282946	13.8643	0	1	0	0	1	1	0	0
573	2012	K	0	0	0	0	0	7.87401	21.6789	0.683833	0.0245542	0.0082	0.365497	0.191571	0.308322	0.000917926	0.0423602	13.2177	0	0	0	0	1	0	0	1
573	2013	K	0	0	0	0	0	8.13622	21.7967	0.643232	0.0392529	0.0082	0.394915	0.188226	0.213859	0.000820601	0.0335662	13.3047	0	0	0	0	1	0	0	1
573	2014	K	0	0	0	0	0	8.09732	21.9239	0.695504	0.00192108	0.0079	0.30225	0.188226	0.42415	0.000864341	0.0286114	13.3047	0	0	0	0	1	0	0	1
573	2015	K	0	0	0	0	0.693147	7.11977	21.8823	0.4622	-0.0303726	0.032	0.279762	0.183834	0.293211	0.00188363	0.0253624	13.3047	0	0	0	0	1	0	0	1
573	2016	K	0	0	0	0	0	8.47583	21.7387	0.357615	0.0647235	0.032	0.276608	0.185807	0.845113	0.000539073	0.0204718	13.3047	0	0	0	0	1	0	0	1
573	2017	K	0	0	0	0	0	7.53185	21.8014	0.706504	0.0110974	0.032	0.228944	0.200977	0.981905	0.000976885	0.0424508	13.4	0	0	0	0	1	0	0	1
573	2018	K	0	0	0	0	0	7.98819	21.9671	0.929921	0.0123981	2.1726	0.183281	0.227768	0.693026	0.0011608	0.0429628	13.4588	0	0	0	0	1	0	0	1
573	2019	K	0	0	0	0	0.693147	8.06324	21.7992	0.916883	0.0173345	2.1733	0.287285	0.229786	0.915227	0.00105012	0.0458622	13.4588	0	0	0	0	1	0	0	1
573	2020	K	0	0	0	0	0	8.00303	21.8576	0.931405	-0.039844	1.0272	0.240612	0.25706	0.596119	0.00100343	0.038401	13.4588	0	0	0	0	1	0	0	1
573	2021	K	0	0	0	0	0	8.47924	21.6427	0.876795	0.0484936	1.0272	0.345126	0.264815	0.729045	0.000572286	0.0346635	13.4588	0	0	0	0	1	0	0	1
573	2022	K	0	0	0	0	0	8.25905	21.6635	0.706203	0.0135223	1.0272	0.0979038	0.243828	0.640708	0.000730295	0.0320168	13.4588	0	0	0	0	1	0	0	1
576	2012	C22	0	0	0	0	0.693147	7.45076	20.6398	0.382763	0.0514453	0.0258	0.0865408	0.213392	0.494048	0.000484052	0.10049	12.7657	0	0	0	0	1	0	1	0
576	2013	C22	0	0	0	0	0.693147	7.36137	21.1131	0.443509	0.0300056	0.0096	0.0817257	0.44937	2.24115	0.000565599	0.074203	13.1224	0	0	0	0	1	0	1	0
576	2014	C22	0	0	0	0	0.693147	6.87289	21.0991	0.367878	0.00682264	0.0049	0.069593	0.497586	1.90019	0.000765643	0.433456	13.1224	0	0	0	0	1	0	1	0
576	2015	C22	0	0	0	0	0.693147	6.68266	21.3952	0.317107	0.103859	1.9129	0.0399741	0.503987	3.66313	0.00139508	0.331383	13.1224	0	0	0	0	1	0	1	0
576	2016	C22	0	0	0	0	0.693147	6.8784	21.1785	0.223197	0.0579371	1.9129	-0.0867761	0.51341	3.51962	0.00117682	0.405405	13.1224	0	0	0	0	1	0	1	0
576	2017	C22	0	0	0	0	0.693147	7.14311	20.9136	0.159386	-0.203747	1.4388	0.026124	0.487147	5.43669	0.00111745	0.223449	13.1224	0	0	0	0	1	0	1	0
576	2018	C22	0	0	0	0	0.693147	7.46573	21.2334	0.529364	0.0748373	0.0049	0.0831623	0.444923	2.04414	0.00137492	0.0417574	13.2177	0	0	0	0	1	0	1	0
576	2019	C22	0	0	0	0	0	7.69848	21.1843	0.424508	0.0664964	2.2936	0.32129	0.461597	1.87545	0.00090879	0.0379506	13.2177	0	0	0	0	1	0	1	0
576	2020	C35	0	0	0	0	0	7.90113	21.3876	0.404712	0.391057	2.2887	0.386535	0.461597	4.42343	0.00116002	0.0164973	13.5924	0	1	0	0	1	1	0	0
576	2021	C35	0	0	0	0	0	7.87229	21.3409	0.33355	0.0207229	2.5103	0.404242	0.453185	4.72853	0.00128883	0.0211786	13.5924	0	1	0	0	1	1	0	0
576	2022	C35	0	0	0	0	0	7.53426	21.4197	0.43291	0.0614788	2.4965	0.603492	0.455443	4.93552	0.00136323	0.0287892	13.5924	0	1	0	0	1	1	0	0
581	2012	C36	0	0	0	0	0	8.7665	23.1262	0.565877	0.0984175	0.0067	0.247604	0.368305	2.76163	0.000886379	0.127063	14.221	1	1	0	0	1	1	0	0
581	2013	C36	0	0	0	0	0	8.86236	23.2939	0.467673	0.0956721	0.0067	0.253967	0.356499	2.36223	0.000998845	0.112514	14.221	1	1	0	0	1	1	0	0
581	2014	C36	0	0	0	0	0	9.01569	23.3966	0.538425	0.115306	0.0067	0.254038	0.357283	2.31236	0.00102085	0.0931592	14.1662	1	1	0	0	1	1	0	0
581	2015	C36	0	0	0.693147	0	0	8.75973	23.4772	0.579819	0.102857	0.0104	0.234498	0.374059	2.65004	0.00138381	0.147772	14.1662	1	1	0	0	1	1	0	0
581	2016	C36	0	0	0	0	0	8.85254	23.5719	0.677482	0.104708	0.0104	0.239501	0.370143	2.72131	0.00124157	0.141791	14.1662	1	1	0	0	1	1	0	0
581	2017	C36	0	0	0	0	0	9.17197	23.7305	0.739317	0.141204	0.0104	0.250136	0.363149	2.45866	0.00103225	0.127768	14.2729	1	1	0	0	1	1	0	0
581	2018	C36	0	0	1.09861	1	0	9.12303	23.7626	0.982606	0.119947	0.0106	0.232733	0.383946	2.71044	0.000670749	0.129589	14.2729	1	1	0	0	1	1	0	0
581	2019	C36	0	0	1.09861	1	1.38629	9.11744	23.8996	0.978774	0.102685	0.0106	0.240655	0.398564	1.81551	0.000585163	0.118755	14.2729	1	1	0	0	1	1	0	0
581	2020	C36	0	0	0	0	1.09861	9.49774	24.032	0.910959	0.110029	0.2598	0.190513	0.40825	1.66983	0.000607602	0.105381	14.3223	1	1	0	0	1	1	0	0
581	2021	C36	0	0	1.09861	1	1.60944	9.5539	24.0544	0.994737	0.0957806	0.2463	0.179943	0.36842	1.62958	0.000447196	0.104831	14.3223	1	1	0	0	1	1	0	0
581	2022		0	0	1.09861	1	1.38629	9.39837	24.0742	1.05839	0.00675918	0.2464	0.134587	0.363437	1.28963	0.000460647	0.132146	14.473	1	1	0	0	1	1	0	0
582	2012	G	0	0	0	0	0	8.36588	21.1266	0.622355	0.0341327	0.0121	0.0733442	0.467664	0.768253	0.000268124	0.372369	12.3458	1	0	0	1	0	0	1	0
582	2013	G	0	0	0	0	0	8.10756	22.8713	0.90126	0.117135	0.0021	0.303293	0.907328	0.612987	0.000488461	0.69621	13.4298	1	0	0	1	0	0	1	0
582	2014	G	0	0	0	0	0	8.25167	22.8746	0.807951	0.0708774	0.0004	0.269487	0.905205	0.397605	0.000513044	0.714894	13.4298	1	0	0	1	0	0	1	0
582	2016	G	0.693147	1	0	0	2.56495		23.23	0.88136	0.0390108	0.0003	0.343466	0.813358	0.815678	0.000830695	0.639456	13.567	1	0	0	1	0	0	1	0
582	2017	G	0	0	0	0	2.30259		23.2758	0.939715	0.0469325	0.0003	0.363038	0.805924	0.741384	0.000805163	0.628629	13.4588	1	0	0	1	0	0	1	0
582	2018	G	0	0	0	0	2.3979		23.5633	0.990085	0.0474733	0.0002	0.369506	0.733683	0.968743	0.000783534	0.608925	13.7101	1	0	0	1	0	0	1	0
582	2019	G	0	0	0	0	2.19722		23.6219	0.927068	0.0606781	0.0306	0.3886	0.737145	0.616099	0.000789992	0.655395	13.7101	1	0	0	1	0	0	1	0
582	2020	G	0	0	0	0	1.60944		23.6894	0.83004	0.0627581	0.0348	0.3839	0.760519	0.857246	0.000823031	0.594574	13.7642	1	0	0	1	0	0	1	0
582	2021	G	0	0	0.693147	0	1.38629		24.0148	1.00197	0.0497708	0.02	0.35902	0.75403	0.859881	0.000841277	0.462873	13.7642	1	0	0	1	0	0	1	0
582	2022	G	0	0	0.693147	0	1.38629		24.1065	1.05499	0.0408158	0.0193	0.344173	0.748177	0.546124	0.000797262	0.56731	13.7642	1	0	0	1	0	0	1	0
586	2012	C39	0	0	0	0	0.693147	7.52794	20.058	0.426159	0.0165827	0	0.221255	0.273465	1.15638	0.000556545	0.091405	13.1224	0	1	1	0	0	1	0	0
586	2013	C39	0	0	0	0	0	7.46303	20.0088	0.342924	0.0337387	0	0.178522	0.287462	1.48401	0.000591474	0.0844487	13.1224	0	1	1	0	0	1	0	0
586	2016	C39	0	0	0	0	1.09861	7.6242	20.1282	0.125038	0.00701261	0	0.177086	0.304738	1.3792	0.000781611	0.0594531	13.0753	0	1	1	0	0	1	0	0
586	2017	C39	0	0	0	0	1.38629	7.43365	20.1447	0.148864	0.00170172	0	0.22167	0.323126	1.35561	0.00095166	0.0661686	12.8992	0	1	1	0	0	1	0	0
586	2018	C39	0	0	0	0	1.60944	7.47826	20.2114	0.23265	-0.00322008	0	0.216371	0.306773	1.29882	0.000618812	0.0751162	12.8992	0	1	1	0	0	1	0	0
586	2019	C39	0	0	0	0	1.94591	7.52001	20.2536	0.269458	0.00957619	0	0.244899	0.354237	1.272	0.000573267	0.0736135	12.8992	0	1	1	0	0	1	0	0
586	2020	C39	0	0	0	0	0.693147	7.66606	20.0116	0.302592	0.0408217	0	0.272848	0.397775	1.71217	0.000592887	0.0896903	12.8992	0	1	1	0	0	1	0	0
586	2021	C39	0	0	0	0	0	7.56319	20.0601	0.265631	0.0558064	0	0.301749	0.397775	1.79848	0.000733759	0.103987	12.8992	0	1	1	0	0	1	0	0
586	2022	C39	0	0	0	0	0.693147	7.52993	20.1403	0.30346	0.0357995	0	0.300815	0.397775	1.74435	0.000796225	0.103673	12.8992	0	1	1	0	0	1	0	0
589	2012	C29	0	0	0	0	0	8.86309	22.6306	0.986561	0.0186195	0.0156	0.164734	0.360664	0.790772	0.000447156	0.315678	13.5924	1	1	1	0	0	1	0	0
589	2013	C29	0	0	0	0	0	8.85823	22.7477	0.981387	0.0243726	0.0156	0.197001	0.343859	0.695015	0.000537812	0.267926	13.5924	1	1	1	0	0	1	0	0
589	2014	C29	0	0	0	0	0	8.59707	22.9985	0.915686	0.0193021	0.0098	0.201404	0.428137	0.881668	0.000682981	0.316773	13.5924	1	1	1	0	0	1	0	0
589	2015	C29	0	0	0	0	0	8.40723	23.137	0.845212	-0.0247299	0.0098	0.118264	0.263882	0.948137	0.000779564	0.308407	13.8155	1	1	1	0	0	1	0	0
589	2016	C29	0	0	0	0	0	8.56202	23.0678	0.911721	0.00136692	0.0098	0.107007	0.264615	0.889339	0.000635093	0.362628	13.8155	1	1	1	0	0	1	0	0
589	2017	C29	0	0	0	0	0	8.79505	22.997	0.971809	-0.022011	0.0098	0.075909	0.264228	0.706617	0.000568151	0.382227	13.8155	1	1	1	0	0	1	0	0
589	2018	C29	1.09861	1	0	0	0	8.76387	23.0729	1.08458	0.00873142	0.0098	0.151725	0.265328	0.71922	0.000358325	0.363738	13.8155	1	1	1	0	0	1	0	0
589	2019	C29	0.693147	1	0	0	0	8.75493	23.0766	1.01056	0.0128979	0.0036	0.201319	0.265762	0.727457	0.000484622	0.314135	13.8155	1	1	1	0	0	1	0	0
589	2020	C29	0.693147	1	0	0	0	8.76882	23.167	0.970026	0.103322	0.2558	0.236294	0.258141	0.787535	0.000581209	0.326738	13.8155	1	1	1	0	0	1	0	0
589	2021	C29	0.693147	1	0	0	0	8.78377	23.2786	1.0042	0.0303213	0.2133	0.157294	0.317122	0.822925	0.000490966	0.358743	13.8155	1	1	1	0	0	1	0	0
589	2022	C29	1.09861	1	0	0	0	8.87763	23.4808	1.06557	0.030144	0.2071	0.167208	0.304336	1.1061	0.000463449	0.33956	14.221	1	1	1	0	0	1	0	0
590	2012	C27	0	0	0	0	0	6.86911	20.3723	0.279811	0.210653	0	0.510342	0.386304	1.4851	0.00184168	0.232939	13.039	1	1	0	1	0	1	0	0
590	2013	C27	0	0	0	0	0	6.60893	20.1301	0.162327	-0.261743	0	0.509852	0.390017	0.792072	0.00458255	0.221352	13.039	1	1	0	1	0	1	0	0
590	2014	C27	0	0	0	0	0	6.35325	20.1902	0.148394	-0.150556	0	0.516404	0.391087	0.669297	0.00545371	0.236969	13.039	1	1	0	1	0	1	0	0
590	2015	C27	0	0	0	0	0.693147	6.71233	20.1913	0.095273	0.0381046	0	0.552256	0.38669	0.639548	0.00261057	0.248615	13.039	1	1	0	1	0	1	0	0
590	2016	C27	0	0	0	0	0.693147	6.78237	20.2623	0.132679	0.0822718	0	0.525656	0.385515	0.855018	0.00214091	0.226158	13.039	1	1	0	1	0	1	0	0
590	2017	C27	0	0	0	0	0.693147	6.84884	20.5883	0.228779	0.0131692	0	0.561223	0.47405	2.78713	0.00201514	0.184655	13.039	1	1	0	1	0	1	0	0
590	2018	C27	0	0	0	0	0.693147	6.25553	20.5207	0.413934	-0.045175	0	0.47229	0.471325	2.9637	0.00354151	0.186744	13.2357	1	1	0	1	0	1	0	0
590	2019	C27	0	0	0	0	0.693147	6.80637	20.5569	0.288335	0.0510325	0	0.532209	0.472172	2.86264	0.00207641	0.169376	13.2357	1	1	0	1	0	1	0	0
590	2020	C27	0	0	0	0	0.693147	6.67375	20.6092	0.391737	0.0261342	0	0.557196	0.472995	2.84315	0.00289333	0.162851	13.2357	0	1	0	1	0	1	0	0
590	2021	C27	0	0	0	0	1.79176	6.63571	20.6906	0.365105	0.0381056	0	0.552771	0.461511	2.4991	0.00264555	0.236086	13.3047	1	1	0	1	0	1	0	0
590	2022	C27	0	0	0	0	1.60944	6.7356	20.8775	0.447965	0.0170268	0	0.511233	0.461511	1.51385	0.0023179	0.228794	13.3047	1	1	0	1	0	1	0	0
591	2012	F	0	0	0	0	0	9.03969	21.7964	0.709924	0.00677147	0	0.140572	0.510631	0.554656	0.000436369	0.136552	13.5411	1	0	0	0	0	0	0	1
591	2013	F	0	0	0	0	1.60944	9.00604	21.8774	0.651783	0.00664018	0	0.1447	0.515812	0.594898	0.000418003	0.144388	13.8155	1	0	0	0	0	0	0	1
591	2014	F	0	0	0	0	2.07944	9.05105	21.9245	0.490774	-0.0013108	0	0.15304	0.408762	0.62108	0.000453907	0.137093	13.8155	1	0	0	0	0	0	0	1
591	2016	D	0	0	0	0	0.693147	7.97467	24.1167	0.960072	0.0258491	0.0016	0.328602	0.376944	1.32106	0.000387263	0.583355	15.1713	1	0	0	0	0	0	1	0
591	2017	D	0	0	0	0	1.79176	8.11154	24.1748	0.909573	0.0264406	0.0016	0.34408	0.376944	1.1534	0.000342694	0.634853	15.1505	1	0	0	0	0	0	1	0
591	2018	D	0	0	0	0	1.60944	8.0629	24.2561	1.08537	0.0260124	0.0016	0.391143	0.376944	1.08669	0.00035086	0.671606	15.0275	1	0	0	0	0	0	1	0
591	2019	D	0	0	0	0	0.693147	8.03955	24.3463	1.04658	0.0252635	0.0016	0.480965	0.376944	1.22367	0.000393486	0.682806	15.1452	1	0	0	0	0	0	1	0
591	2020	D	0	0	0	0	1.09861	8.08699	24.3908	0.882486	0.026614	0.0016	0.484174	0.376944	1.92088	0.000444035	0.673783	15.1968	1	0	0	0	0	0	1	0
591	2021	D	0	0	1.38629	1	1.60944	8.38159	24.4063	0.757708	0.0295346	0.0016	0.416679	0.376944	2.00183	0.000379947	0.626335	14.4935	1	0	0	0	0	0	1	0
591	2022	D	0	0	1.38629	1	1.38629	8.65431	24.5627	0.898663	0.0323963	0.0012	0.327699	0.362346	2.30028	0.00027364	0.51778	14.7197	1	0	0	0	0	0	1	0
592	2012	A	0	0	0	0	0	7.49547	21.325	0.399625	0.00908753	0.0086	0.14277	0.394248	1.83689	0.000811836	0.130002	13.3047	0	0	0	0	1	0	0	1
592	2013	A	0	0	0	0	0	7.62865	21.3259	0.250618	0.0267134	0.0086	0.165939	0.376766	1.08751	0.000696295	0.144566	13.3047	0	0	0	0	1	0	0	1
592	2014	A	0	0	0	0	0	7.66273	21.4866	0.143959	0.0386705	0.0086	0.191307	0.396493	0.831959	0.000625333	0.11493	13.3047	0	0	0	0	1	0	0	1
592	2015	A	0	0	0	0	1.38629	7.78558	22.0577	0.216229	0.0140632	0.0282	0.176437	0.354214	5.99822	0.00061054	0.0615054	13.3047	0	0	0	0	1	0	0	1
592	2016	A	0	0	0	0	1.60944	7.60635	22.1513	0.305592	0.00134247	0.0282	0.147666	0.304271	3.32167	0.000801015	0.0536364	13.3047	0	0	0	0	1	0	0	1
592	2018	A	0	0	0	0	0.693147	7.67744	22.1828	0.709951	0.0072642	0.0282	0.144882	0.308451	1.47577	0.000894349	0.0778488	13.3847	0	0	0	0	1	0	0	1
592	2019	A	0	0	0	0	0	7.68934	22.1704	0.679348	0.00422414	0.0282	0.113796	0.28022	1.74957	0.000774501	0.0818393	13.1224	0	0	0	0	1	0	0	1
592	2020	A	0	0	0	0	0	7.96158	22.3198	0.706197	-0.0654386	0.0282	0.108582	0.239493	1.09335	0.00054806	0.0655671	13.3847	0	0	0	0	1	0	0	1
592	2021	A	0	0	0	0	0	8.24848	22.148	0.537278	-0.172011	0.0282	0.0904648	0.198516	0.922774	0.000448711	0.0704483	13.3847	0	0	0	0	1	0	0	1
592	2022	A	0	0	0	0	0	7.93033	22.1356	0.602087	-0.0470157	0.0282	0.0683933	0.183825	0.734331	0.00066799	0.0732841	13.5278	0	0	0	0	1	0	0	1
593	2012	F	0	0	0	0	0	6.94396	20.257	0.379002	0.0253748	0.0082	0.291385	0.245658	0.42545	0.000872781	0.534036	12.948	0	0	1	0	0	0	0	1
593	2013	F	0	0	0	0	1.09861	6.9707	20.6245	0.525051	0.0510005	0.0062	0.297039	0.243202	2.16167	0.0009563	0.359065	12.948	0	0	1	0	0	0	0	1
593	2014	F	0	0	0	0	1.79176	6.91239	20.4602	0.402879	0.020505	0.0049	0.295657	0.411499	2.47588	0.000982793	0.458059	13.1224	0	0	1	0	0	0	0	1
593	2015	F	0	0	0	0	1.38629	6.85026	20.4878	0.227714	0.0180827	0.0049	0.311427	0.452966	2.06357	0.00117569	0.476133	13.1224	0	0	1	0	0	0	0	1
593	2016	F	0	0	0	0	0	6.95699	21.1812	0.46353	-0.043589	0.0038	0.271065	0.476279	0.787982	0.0011596	0.271086	13.1224	0	0	1	0	0	0	0	1
593	2017	D	0	0	0	0	0	6.96561	21.2689	0.511093	0.0162206	0	0.29125	0.476279	1.71346	0.00100323	0.255335	13.4588	0	0	1	0	0	0	1	0
593	2018	D	0	0	0	0	0.693147	7.18686	21.214	0.601605	-0.110957	0	0.225265	0.44523	1.09166	0.0010565	0.31166	13.4588	0	0	1	0	0	0	1	0
593	2020	D	0	0	0	0	0.693147	7.75013	21.4661	0.633479	0.0206378	0	0.192732	0.448578	0.593338	0.00072156	0.356524	13.5924	0	0	1	0	0	0	1	0
593	2021	D	0	0	0	0	1.09861	7.90537	21.4943	0.643991	0.0262932	0.01	0.169415	0.44394	0.680059	0.000648141	0.365586	13.5924	0	0	1	0	0	0	1	0
593	2022	D	0	0	0	0	0.693147	7.88716	21.5044	0.586979	0.0217004	0.01	0.149915	0.436041	0.740601	0.000532902	0.353926	13.5924	0	0	1	0	0	0	1	0
595	2012	C34	0	0	0	0	0	6.84565	20.5518	0.43352	0.00942353	0.0104	0.127596	0.378706	0.650245	0.00112488	0.21551	12.8992	0	1	1	0	0	0	0	1
595	2013	C34	0	0	0	0	0	6.73118	20.7774	0.538313	-0.12604	0.0091	0.0170929	0.39698	0.655218	0.00139391	0.15919	12.8992	0	1	1	0	0	0	0	1
595	2014	C34	0	0	0	0	0	7.00985	20.7683	0.410121	0.0195904	0.0058	0.0192286	0.315771	0.637069	0.00121799	0.224538	12.8992	0	1	1	0	0	0	0	1
595	2015	C34	0	0	0	0	0	6.50672	20.9132	0.343767	-0.121711	0.0022	-0.00961548	0.547057	1.12645	0.00236398	0.179502	12.8992	0	1	1	0	0	0	0	1
595	2016	C34	0	0	0	0	0	6.67246	20.9061	0.200634	-0.070077	0.0215	0.0390302	0.554309	0.904372	0.00135327	0.282256	13.2708	0	1	1	0	0	0	0	1
595	2017	C34	0	0	0	0	0	6.77192	21.3542	0.474591	0.018077	0.9553	0.227333	0.537176	0.776601	0.00150748	0.25763	13.1224	0	1	1	0	0	0	0	1
595	2018	C34	0	0	0	0	0	6.77228	21.3268	0.599617	-0.052389	0.7912	0.229968	0.543149	0.651792	0.0017172	0.253015	13.1224	0	1	1	0	0	0	0	1
595	2019	C34	0	0	0	0	0	6.47353	21.145	0.429625	-0.193267	0.6699	0.00401562	0.527593	0.465212	0.00202365	0.285101	13.4588	0	1	1	0	0	0	0	1
595	2020	C34	0	0	0	0	0	6.07523	21.1826	0.556235	0.00865434	0.3883	-0.0757815	0.657564	2.70862	0.00441984	0.266511	13.8155	1	1	1	0	0	0	0	1
595	2021	C34	0	0	0	0	0	5.97192	21.033	0.32603	-0.119975	0	-0.0814473	0.659902	1.75113	0.00307782	0.280025	13.8155	1	1	1	0	0	0	0	1
595	2022	C34	0	0	0	0	0	6.35775	20.9416	0.152373	-0.0680074	0	0.0243761	0.656816	1.45657	0.00174213	0.289878	13.8155	1	1	1	0	0	0	0	1
596	2012	C15	0	0	0	0	0	8.7519	22.3925	0.30214	0.151957	0.0002	0.709122	0.589148	1.50145	0.000936439	0.147649	13.8643	1	0	0	1	0	0	0	1
596	2013	C15	0	0	0	0	0	8.69006	22.484	0.472122	0.11182	0.0002	0.697825	0.584966	1.28787	0.0011138	0.217723	13.9108	1	0	0	1	0	0	0	1
596	2014	C15	0	0	0	0	0	8.61696	22.5817	0.343678	0.097632	0.0002	0.686279	0.587407	1.27102	0.00124585	0.268828	13.9108	1	0	0	1	0	0	0	1
596	2015	C15	0	0	0	0	1.38629	8.74604	22.695	0.375775	0.105258	0.0002	0.712656	0.585282	1.4114	0.00103518	0.235416	13.9108	1	0	0	1	0	0	0	1
596	2016	C15	0	0	0	0	2.3979	8.85464	22.8907	0.372236	0.106828	0	0.746792	0.587769	1.10799	0.00092488	0.213559	14.152	1	0	0	1	0	0	0	1
597	2012	C27	0	0	0	0	0	8.44933	22.5139	0.947749	0.000914793	0.0021	0.247474	0.517024	0.531423	0.00146995	0.229814	13.5278	1	1	0	0	1	1	0	0
597	2013	C27	0.693147	1	0	0	0	8.41825	22.7454	0.913922	-0.0243876	0.0045	0.308679	0.517024	0.587256	0.00156723	0.2048	13.5278	1	1	0	0	1	1	0	0
597	2014	C27	0	0	0	0	1.09861	8.49878	22.8719	0.844403	0.0103948	0.0056	0.315293	0.394452	0.715912	0.0011842	0.202654	13.8155	1	1	0	0	1	1	0	0
597	2015	C27	0	0	0	0	0	8.19093	22.8857	0.788662	-0.0454259	0.0054	0.265305	0.381891	0.655704	0.00146706	0.386456	13.8155	1	1	0	0	1	1	0	0
597	2016	C27	0	0	0	0	0	8.43187	23.0046	0.820852	0.0028508	0.0044	0.315571	0.361588	0.800146	0.00108771	0.332302	13.8155	1	1	0	0	1	1	0	0
597	2017	C27	0	0	0	0	2.07944	8.60927	23.0835	0.777823	0.00903279	0.007	0.395422	0.327737	0.698335	0.0012647	0.29607	13.8155	1	1	0	0	1	1	0	0
597	2018	C27	0	0	0	0	1.38629	8.9108	23.1845	0.865343	0.0180505	0.0058	0.41376	0.49026	0.649806	0.000681186	0.248681	13.3047	0	1	0	0	1	1	0	0
597	2019	C27	0	0	0	0	2.30259	8.95255	23.2522	0.830594	0.014052	1.5168	0.435774	0.454819	0.581776	0.00090139	0.278216	13.8643	0	1	0	0	1	1	0	0
597	2020	C27	0	0	0	0	0.693147	8.75938	23.2219	0.828341	0.000876525	0.7501	0.391596	0.539161	0.587725	0.00100818	0.390879	13.8643	0	1	0	0	1	1	0	0
597	2021	C27	0	0	0	0	0.693147	8.87998	23.3019	0.766182	0.00753132	0.8268	0.39486	0.611134	0.677197	0.000911826	0.34181	14.152	0	1	0	0	1	1	0	0
597	2022	C27	0	0	0	0	1.60944	8.9721	23.3487	0.773589	0.026458	1.6289	0.389553	0.558248	0.796629	0.000857885	0.31802	14.152	0	1	0	0	1	1	0	0
598	2012	D	0	0	0	0	0	7.73513	22.845	0.774963	0.0940995	0	0.51715	0.457228	0.776412	0.000632008	0.38855	13.4588	1	0	1	0	0	0	0	1
598	2013	D	0	0	0	0	0	7.7146	23.0654	0.633182	0.0800388	0	0.479677	0.434452	1.08605	0.000593751	0.480197	13.5924	1	0	1	0	0	0	0	1
598	2014	D	0	0	0	0	0	7.8271	23.2207	0.577772	0.0675226	0	0.441512	0.432494	1.11896	0.000633875	0.425363	13.5924	1	0	1	0	0	0	0	1
598	2015	D	0	0	0	0	0	7.9246	23.3767	0.52312	0.0646907	0	0.423174	0.442377	0.995549	0.000660928	0.393634	13.5924	1	0	1	0	0	0	0	1
598	2016	D	0	0	0	0	0	7.88307	23.5517	0.677667	0.0560228	0	0.419518	0.4474	0.635404	0.000714733	0.3727	13.5924	1	0	1	0	0	0	0	1
598	2017	D	0	0	0	0	0	8.03427	23.6547	0.756674	0.0513617	0	0.411886	0.444485	0.773664	0.000702066	0.391358	13.5924	1	0	1	0	0	0	0	1
598	2018	D	0	0	0	0	0	8.11016	23.7641	0.959567	0.0508471	0	0.407944	0.44833	0.57775	0.000686118	0.383145	13.5924	1	0	1	0	0	0	0	1
598	2019	D	0.693147	1	0	0	0	8.23138	23.9556	0.932595	0.0475811	0	0.389289	0.478464	0.715953	0.000661116	0.345826	13.5924	1	0	1	0	0	0	0	1
598	2020	D	0	0	0	0	0	8.33125	24.1534	0.962889	0.0470728	0	0.400178	0.527227	0.657939	0.000656696	0.280677	13.5924	1	0	1	0	0	0	0	1
598	2021	D	0.693147	1	0	0	0	8.52588	24.2646	0.884002	0.0462299	0	0.398363	0.574988	0.721266	0.00065832	0.274546	13.5924	1	0	1	0	0	0	0	1
598	2022	D	0.693147	1	0	0	0.693147	8.62436	24.3697	1.03027	0.0464682	0.0127	0.384732	0.574621	0.88201	0.000608623	0.264857	13.5924	1	0	1	0	0	0	0	1
599	2012	C29	0	0	0	0	0	8.75506	22.2948	0.940188	0.00431613	0.0048	0.0900981	0.225931	0.510147	0.000276763	0.44532	13.5924	1	1	0	0	1	1	0	0
599	2013	C29	0.693147	1	0	0	0	8.66183	22.3047	0.899168	0.00571714	0.0048	0.101298	0.258826	0.712573	0.000322067	0.423062	13.8155	1	1	0	0	1	1	0	0
599	2014	C29	0	0	0	0	0	8.41754	22.3429	0.818841	0.0117355	0.0036	0.144726	0.326622	0.893583	0.000613364	0.367452	14.221	1	1	0	0	1	1	0	0
599	2015	C29	0	0	0	0	0.693147	8.30707	22.499	0.605994	0.0108066	0.0036	0.194912	0.319636	0.953514	0.000845283	0.18146	14.221	1	1	0	0	1	1	0	0
599	2016	C29	0	0	0	0	0.693147	8.67945	22.704	0.745647	0.0118479	0.0064	0.146362	0.319597	0.856344	0.000552291	0.241244	14.221	1	1	0	0	1	1	0	0
599	2017	C29	0	0	0.693147	0	0	8.34365	22.8491	0.861286	0.0130479	0.0064	0.187221	0.350013	0.663051	0.000693728	0.338679	14.221	1	1	0	0	1	1	0	0
599	2018	C29	0	0	0	0	0	8.26633	22.9166	1.07345	0.00333007	0.2105	0.0976801	0.359866	0.783976	0.000456684	0.338364	14.221	1	1	0	0	1	1	0	0
599	2019	C29	0	0	0	0	0	8.30086	23.0139	0.973933	-0.033058	0.1131	0.0908043	0.362961	0.736736	0.000461141	0.376376	14.4574	1	1	0	0	1	1	0	0
599	2020	C29	0	0	0	0	1.60944	8.31332	23.0318	1.00242	-0.00724646	0.0557	0.1148	0.413195	0.592397	0.000458973	0.435596	14.4574	1	1	0	0	1	1	0	0
599	2021	C29	0	0	0.693147	0	1.09861	8.2214	23.1069	0.968815	-0.0377792	0.0024	0.03428	0.399426	0.571083	0.000508375	0.402072	14.4574	1	1	0	0	1	1	0	0
599	2022	C29	0	0	0	0	0	8.21851	23.0121	0.90468	-0.0668217	0.0046	0.0131281	0.413512	0.434751	0.000431182	0.433429	14.4574	1	1	0	0	1	1	0	0
600	2012	D	0	0	0	0	0.693147	8.79421	23.557	1.0213	0.0104499	0	0.163749	0.761129	0.414172	0.00076474	0.356773	13.4588	1	0	0	0	1	0	1	0
600	2013	D	0	0	0	0	0	8.70757	23.6136	1.06489	0.0613178	0	0.257384	0.714574	0.488208	0.000681679	0.707025	13.7101	1	0	0	0	1	0	1	0
600	2014	D	0	0	0	0	0.693147	8.86549	23.9527	0.872783	0.122966	0	0.373255	0.732765	0.790448	0.000740851	0.602926	13.8925	1	0	0	0	1	0	1	0
600	2015	D	0	0	0	0	0	8.74578	23.9754	0.866782	0.102688	0.0005	0.410116	0.735871	0.625688	0.000778221	0.571382	13.8925	1	0	0	0	1	0	1	0
600	2016	D	0	0	0	0	0	8.69312	24.0988	0.947976	0.0706208	0	0.313953	0.72622	0.491652	0.000593253	0.55942	13.8925	1	0	0	0	1	0	1	0
600	2017	D	0	0	0	0	0	8.77262	24.1626	0.984255	0.0103407	0.0005	0.153587	0.687533	0.52649	0.000624321	0.594536	13.8925	1	0	0	0	1	0	1	0
600	2018	D	0	0	0	0	0	9.07712	24.1844	1.09316	0.020999	0.0005	0.161352	0.687533	0.555399	0.000506953	0.551582	14.123	1	0	0	0	1	0	1	0
600	2019	D	0	0	0	0	0	9.05489	24.2001	1.10659	0.0278785	0.0005	0.180411	0.695588	0.599296	0.000554944	0.579787	14.2855	1	0	0	0	1	0	1	0
600	2020	D	0	0	0	0	0	9.07355	24.2462	1.09149	0.0364398	0.0005	0.207533	0.692651	0.626536	0.000653546	0.554229	14.2855	1	0	0	0	1	0	1	0
600	2021	D	0	0	1.79176	1	0	9.11638	24.3746	1.05006	-0.075869	0.0005	-0.0479058	0.685928	0.904811	0.000612807	0.490969	14.4033	1	0	0	0	1	0	1	0
600	2022		0	0	1.09861	1	1.09861	9.31851	24.3217	1.05235	0.00401986	0.0004	0.104495	0.677104	0.701785	0.000314072	0.498661	14.4033	1	0	0	0	1	0	1	0
601	2012	D	0	0	0	0	0	7.46504	22.8618	1.00698	0.0177352	0.0861	0.30463	0.199476	0.347443	0.000681585	0.831545	13.5924	1	0	0	0	1	0	1	0
601	2013	D	0	0	0	0	0	7.56579	22.8854	0.910412	0.02729	0.0843	0.336089	0.249484	0.486587	0.000674318	0.787407	13.5924	1	0	0	0	1	0	1	0
601	2014	D	0	0	0	0	0.693147	7.80673	22.8764	0.798195	0.0313183	0.0942	0.275413	0.248589	0.582027	0.00055884	0.820553	13.5924	1	0	0	0	1	0	1	0
601	2015	D	0	0	0	0	0.693147	7.81307	22.8642	0.545718	0.0352281	0.0868	0.308838	0.368004	0.597481	0.000665279	0.806658	13.5924	1	0	0	0	1	0	1	0
601	2016	D	0	0	0	0	0	7.87311	22.9018	0.648855	0.0534252	0.0864	0.347579	0.371436	0.575332	0.000618313	0.771182	13.5924	1	0	0	0	1	0	1	0
601	2017	D	0	0	0	0	0	7.9672	22.9388	0.751121	0.0509419	0.0852	0.281378	0.372329	0.438141	0.000501537	0.787953	13.5924		0	0	0	1	0	1	0
601	2018	D	0	0	0	0	0	7.91733	23.0277	1.08603	0.0330296	0.0888	0.222537	0.372329	0.57362	0.000565345	0.708109	13.8155		0	0	0	1	0	1	0
601	2019	D	0	0	0	0	0	8.12253	23.1399	0.927657	0.0381505	0.0888	0.253495	0.372329	0.663085	0.00050915	0.696494	13.8155		0	0	0	1	0	1	0
601	2020	D	0	0	0	0	0	8.22315	23.2624	0.853754	0.0183845	0.0944	0.19525	0.414502	0.861483	0.000437295	0.6973	13.8155		0	0	0	1	0	1	0
601	2021	D	0	0	0	0	0	8.01957	23.2856	0.962463	0.00313171	0.075	0.191247	0.414502	0.939843	0.000642771	0.666618	14.0779		0	0	0	1	0	1	0
601	2022		0	0	0	0	0	7.97884	23.3004	0.98548	-0.00631774	0.075	0.1507	0.346065	0.873571	0.00064422	0.691461	14.0779		0	0	0	1	0	1	0
603	2012	B	0	0	0	0	0	7.98834	20.7727	0.398915	0.516567	7.443	0.872278	0.615851	2.69361	0.00084863	0.150565	12.8992	0	0	0	0	1	0	0	1
603	2013	B	0	0	0	0	0	7.90906	20.4761	0.42446	0.503158	7.443	0.826378	0.615851	1.13638	0.000834904	0.189421	12.8992	0	0	0	0	1	0	0	1
603	2014	B	0	0	0	0	0	7.80418	20.8411	0.196502	0.396855	5.5912	0.803523	0.57085	2.12501	0.000919575	0.121791	12.8992	0	0	0	0	1	0	0	1
603	2015	B	0	0	0	0	1.79176	7.93224	21.0658	0.185584	0.329558	13.8617	0.792343	0.378887	0.548363	0.000900214	0.0903899	12.8992	0	0	0	0	1	0	0	1
603	2016	B	0	0	0	0	0.693147	7.72281	21.7675	0.354092	0.15598	12.3537	0.783513	0.480444	5.72319	0.000797703	0.0455865	12.8992	0	0	0	0	1	0	0	1
603	2017	B	0	0	0	0	0	7.78728	22.1629	0.563302	0.114086	12.3537	0.566032	0.480444	2.15719	0.000486981	0.109466	13.3047	0	0	0	0	1	0	0	1
603	2018	B	0	0	0	0	0	8.32799	22.034	0.53759	0.140633	2.793	0.346229	0.455854	0.602635	0.000561787	0.233345	13.3047	0	0	0	0	1	0	0	1
603	2019	B	0	0	0	0	0	8.45706	22.193	0.402942	0.139018	2.793	0.311325	0.427933	0.93938	0.000522647	0.233142	13.3047	0	0	0	0	1	0	0	1
603	2020	B	0	0	0	0	0	7.85198	22.2586	0.398325	0.0919464	2.793	0.458542	0.406851	0.908971	0.000916358	0.232913	13.4588	0	0	0	0	1	0	0	1
603	2021	B	0	0	0	0	0	7.72141	22.395	0.529844	0.119399	2.793	0.670128	0.406851	0.906005	0.00121402	0.320187	13.4588	0	0	0	0	1	0	0	1
603	2022		0	0	0	0	0	7.83442	22.4063	0.551444	0.0944001	2.793	0.543019	0.406851	0.891044	0.00123857	0.344724	13.5924	0	0	0	0	1	0	0	1
605	2012	C27	0	0	0	0	0	5.78309	18.7419	0.112733	0.0393831	0	0.365746	0.587077	0.333943	0.00149405	0.260215	12.8992	1	1	0	0	1	1	0	0
605	2013	C27	0	0	0	0	0	6.0327	19.9763	0.307412	-0.0399665	0	0.322256	0.567539	2.60528	0.00249472	0.0679056	13.473	1	1	0	0	1	1	0	0
605	2014	D	0	0	0	0	0	7.15796	21.5909	0.701682	0.0273879	0	0.226792	0.594324	0.523753	0.000773526	0.477554	13.473	1	0	0	0	1	0	0	1
605	2015	D	0	0	0	0	0	7.18419	21.6163	0.43168	0.0194344	0	0.242323	0.593113	0.578715	0.000894138	0.460637	13.5211	1	0	0	0	1	0	0	1
605	2016	D	0.693147	1	0	0	0	7.23184	21.9659	0.66165	0.0151303	0	0.229087	0.591237	0.356049	0.000963535	0.31622	13.5541	1	0	0	0	1	0	0	1
605	2017	D	0.693147	1	0	0	0	7.86864	22.4554	0.783856	0.0384185	0	0.298685	0.431225	0.667844	0.000953221	0.195653	14.1156	1	0	0	0	1	0	0	1
605	2018	D	0.693147	1	0	0	0	7.83683	22.5709	0.918468	0.0153345	0	0.305548	0.431225	0.601229	0.000933925	0.165112	14.2729	1	0	0	0	1	0	0	1
605	2019	D	0	0	0	0	0	7.80909	22.8579	1.03553	0.00680844	0	0.299593	0.430262	0.555996	0.000970573	0.235705	14.3921	1	0	0	0	1	0	0	1
605	2020	D	0	0	0	0	0	7.80849	22.8846	1.09089	0.00218724	5.847	0.271058	0.430262	0.824931	0.000962761	0.230255	14.4361	1	0	0	0	1	0	0	1
605	2021	D	0	0	0	0	0	7.75499	22.7768	1.08359	0.0043519	5.6768	0.25459	0.411415	0.644355	0.00100515	0.289467	14.4088	1	0	0	0	1	0	0	1
605	2022		0.693147	1	0	0	0	7.72262	22.8124	1.06188	0.00451841	5.6768	0.230302	0.411415	0.658051	0.000909646	0.282741	14.4088	1	0	0	0	1	0	0	1
607	2012	C40	0	0	0	0	2.3979	8.19258	21.424	0.552386	0.0264239	0	0.265127	0.2493	0.788766	0.00111219	0.225038	13.4298	0	1	0	0	1	1	0	0
607	2014	C40	0	0	0	0	3.95124	8.10953	21.3926	0.306543	0.104043	0	0.274531	0.60102	2.3262	0.00056518	0.128956	13.7101	1	1	0	0	1	1	0	0
607	2015	R	0	0	0	0	3.78419	8.14873	21.5966	0.282702	0.145041	0.0606	0.277687	0.590916	2.1642	0.000663408	0.108931	14.0387	1	0	0	0	1	0	0	1
607	2016	R	0	0	0	0	3.91202	8.32388	21.8095	0.381492	0.105843	0.0454	0.309866	0.590916	1.51697	0.00081339	0.0791478	14.221	1	0	0	0	1	0	0	1
607	2017	R	0	0	0.693147	0	3.73767	8.33248	21.8866	0.616249	0.0681864	0.0454	0.253169	0.569299	1.3685	0.000988103	0.0728139	14.221	1	0	0	0	1	0	0	1
607	2018	R	0	0	0.693147	0	3.52636	8.34264	21.9015	0.651379	0.0486116	0.0454	0.275843	0.569299	1.38647	0.000983074	0.0591766	14.221	1	0	0	0	1	0	0	1
607	2019	R	0	0	0	0	3.4012	8.42937	21.9938	0.573705	0.0169984	0.0379	0.258127	0.569299	1.13706	0.00109358	0.0481402	14.0779	1	0	0	0	1	0	0	1
607	2020	R	0	0	0	0	3.3322	8.36587	21.8938	0.603113	-0.109382	0.0379	0.2073	0.568792	0.96106	0.00127087	0.0469896	14.0779	1	0	0	0	1	0	0	1
607	2021	R	0	0	0.693147	0	3.04452	8.55618	22.0635	0.544859	0.0365806	0.0379	0.220242	0.568792	0.833421	0.00113902	0.0360817	14.0779	1	0	0	0	1	0	0	1
607	2022		0	0	0	0	3.04452	8.50239	22.098	0.553603	0.0246386	0.0379	0.216687	0.559548	0.905633	0.00120164	0.0320521	14.0779	1	0	0	0	1	0	0	1
608	2012	K	0	0	0	0	0	7.95257	22.6446	0.871309	0.0412752	0	0.740457	0.417583	0.360864	0.00287927	0.00353319	14.4833	0	0	0	1	0	0	0	1
608	2013	K	0	0	0	0	1.94591	8.05946	22.8705	0.955836	0.0244226	0	0.868525	0.417049	0.529419	0.00290547	0.0042878	14.5574	0	0	0	1	0	0	0	1
608	2014	K	0	0	0	0	1.60944	8.77515	23.1426	1.05264	-0.0527334	0	0.459505	0.405512	0.33887	0.00133708	0.00310219	14.5574	0	0	0	1	0	0	0	1
608	2015	K	0	0	0	0	1.09861	8.0923	23.0508	0.95187	0.00635908	0.0238	0.622705	0.406236	0.320765	0.00242082	0.00295396	14.604	1	0	0	1	0	0	0	1
608	2017	K	0	0	0	0	0.693147	8.27799	22.6995	0.875064	0.0223537	0	0.519567	0.453026	1.40181	0.00238863	0.00161309	14.6484	1	0	0	1	0	0	0	1
608	2018	K	0	0	0	0	0	7.71052	22.6078	1.0088	0.0122812	0	0.793203	0.479816	0.437073	0.00376238	0.00161971	14.6484	1	0	0	1	0	0	0	1
608	2020	K	0	0	0.693147	0	0.693147	8.37617	22.5022	1.27469	0.0197178	0	0.726751	0.471051	0.290628	0.00160584	0.00212953	14.152	0	0	0	1	0	0	0	1
608	2021	K	0.693147	1	0	0	0.693147	7.9131	22.4499	1.32368	0.0143455	0	0.757356	0.471051	0.191118	0.00133274	0.00965647	13.9108	0	0	0	1	0	0	0	1
608	2022	K	0	0	0	0	0.693147	7.567	22.3009	1.1571	-0.0730851	0	0.69094	0.379456	0.109388	0.00166326	0.0090187	13.9108	0	0	0	1	0	0	0	1
609	2012	K	0	0	0	0	0	6.74015	21.1815	0.654117	0.0545389	0.0007	0.333355	0.324419	1.89979	0.00244571	0.0298116	13.1224	0	0	0	0	1	0	0	1
609	2013	K	0	0	0	0	0	7.38842	21.3069	0.664273	0.059828	0.3312	0.351151	0.324419	1.71381	0.00145741	0.0210804	13.4588	0	0	0	0	1	0	0	1
609	2014	K	0	0	0	0	2.07944	8.03044	21.3522	0.41733	0.0631377	7.4986	0.414576	0.260913	2.23686	0.0011278	0.0221547	13.5924	0	0	0	0	1	0	0	1
609	2015	K	0	0	0	0	2.3979	7.65642	21.4076	0.400312	0.00940986	7.3857	0.403465	0.251701	1.7735	0.00153954	0.024769	13.8155	0	0	0	0	1	0	0	1
609	2016	S	0	0	0	0	1.79176	6.76433	21.4731	0.416795	0.0648939	10.0676	0.352078	0.252304	1.58749	0.0113255	0.00925803	13.5924	0	0	0	0	1	0	0	1
609	2017	S	0	0	0	0	0	7.52565	21.2842	0.542075	0.0694456	0.0387	0.324306	0.288399	6.8799	0.00262314	0.00968417	13.8155	0	0	0	0	1	0	0	1
609	2018	S	0	0	0	0	0	6.48229	21.8103	0.982054	-0.0261092	0.0387	0.250566	0.321069	0.317993	0.0155859	0.00303521	13.8155	0	0	0	0	1	0	0	1
609	2019	S	0	0	0	0	0	8.40684	22.1589	0.976198	0.00719248	0	0.423404	0.3072	0.332069	0.000966269	0.00188009	13.9108	0	0	0	0	1	0	0	1
609	2020		0	0	0	0	0	6.84818	22.0796	0.967795	-0.075766	0	0.314577	0.3072	0.319188	0.00439744	0.00158176	13.9108	0	0	0	0	1	0	0	1
609	2021		0	0	0	0	0	8.97322	21.7936	0.83612	-0.110522	0	0.092434	0.31199	0.123403	0.000480487	0.00158996	13.9978	0	0	0	0	1	0	0	1
609	2022		0	0	0.693147	0	0	8.39208	21.5597	0.632601	-0.112097	0	0.0304229	0.292218	0.16483	0.00061745	0.00162133	13.9978	0	0	0	0	1	0	0	1
610	2012	N	0	0	0	0	0	7.55856	20.2588	0.43886	0.0326831	0.0118	0.235411	0.351821	0.827872	0.000426604	0.415179	12.2549	1	0	1	0	0	0	0	1
610	2013	N	0	0	0	0	1.09861	7.33093	20.2813	0.440465	0.0134079	0.0157	0.163769	0.357849	1.19508	0.000579274	0.404954	12.2549	1	0	1	0	0	0	0	1
610	2014	N	0	0	0	0	1.09861	7.35737	20.1727	0.261074	-0.0341358	0.0118	0.0753456	0.42208	1.24883	0.000451837	0.408551	12.2061	1	0	1	0	0	0	0	1
610	2015	N	0	0	0	0	0.693147	7.58932	20.8691	0.32682	0.00992695	0.0897	0.0636545	0.338907	2.00999	0.000555668	0.190528	13.1806	1	0	1	0	0	0	0	1
610	2016	N	0	0	0	0	1.09861	7.68365	21.0467	0.341762	0.00716658	0.0692	0.0628066	0.327496	1.19931	0.000545733	0.150387	13.1806	1	0	1	0	0	0	0	1
610	2017	N	0	0	0	0	0.693147	7.57223	21.0618	0.419335	-0.0144538	0.0702	0.0659357	0.340098	0.940953	0.000492905	0.158994	13.1616	1	0	1	0	0	0	0	1
610	2018	N	0	0	0	0	0.693147	7.78683	20.9127	0.573946	0.0661819	0.0702	0.063634	0.293488	1.83914	0.000459958	0.17474	13.1616	1	0	1	0	0	0	0	1
610	2019	N	0	0	0	0	0.693147	7.81585	20.9379	0.486861	-0.0263967	0.0272	0.0537835	0.303629	1.69936	0.000438107	0.147835	12.5062	1	0	1	0	0	0	0	1
610	2020	N	0	0	0	0	1.09861	6.82516	21.0052	0.554424	0.0259011	0.0272	0.0519597	0.334166	1.27	0.00205972	0.123732	12.5062	1	0	1	0	0	0	0	1
610	2021	N	0	0	0	0	1.09861	7.13006	21.519	0.662714	-0.045503	0.0272	0.0340913	0.3341	0.798007	0.00108728	0.235537	13.415	1	0	1	0	0	0	0	1
610	2022	N	0	0	0	0	1.09861	6.80336	21.4316	0.325939	-0.0858893	0	-0.116362	0.326597	0.571152	0.0018267	0.24688	13.7642	1	0	1	0	0	0	0	1
612	2012	C32	0	0	0	0	0	8.94996	22.5399	0.69088	-0.00277399	0.0024	-0.0178027	0.355266	0.244655	0.000216448	0.265996	13.1224	1	1	0	1	0	0	0	1
612	2013	C32	0	0	0	0	0	8.63484	22.6967	0.796162	0.0389798	0.0018	0.0498068	0.369645	0.696488	0.000220437	0.490175	13.3535	1	1	0	1	0	0	0	1
612	2014	C32	0	0	0	0	0	8.59869	22.9367	0.607534	0.0436231	0.9744	0.0893355	0.422185	0.3162	0.000243321	0.349084	13.4588	0	1	0	1	0	0	0	1
612	2015	C32	0	0	0	0	0	8.50399	22.8783	0.710573	-0.00703484	0.8398	0.0419075	0.336129	1.09148	0.000248262	0.342759	13.4588	0	1	0	1	0	0	0	1
612	2016	C32	0	0	0	0	0	8.36097	22.7087	0.486473	0.0124724	0.3139	0.11888	0.321515	0.561285	0.000469658	0.372483	13.4588	0	1	0	1	0	0	0	1
612	2017	C32	0	0	0	0	0	8.61111	22.7335	0.578238	0.0238323	0.2919	0.0410112	0.491595	0.229993	0.000212993	0.359048	13.4588	0	1	0	1	0	0	0	1
612	2018	C32	0	0	0	0	0	8.61086	22.7307	0.937666	-0.0593076	0.2484	-0.0332213	0.493518	0.389508	0.000406041	0.372461	13.4588	0	1	0	1	0	0	0	1
612	2019	C32	0	0	0	0	0	8.59877	22.6711	0.893548	0.0147528	0.1277	0.0535745	0.493518	0.375552	0.000183929	0.379186	13.4588	0	1	0	1	0	0	0	1
612	2020	C32	0	0	0	0	0	8.63354	22.6886	0.668495	0.0802675	0.1697	0.162613	0.483982	0.386048	0.000273301	0.342932	13.4588	0	1	0	1	0	0	0	1
612	2021	C32	0	0	0	0	0	8.69752	22.7865	0.657935	0.0528523	0.0905	0.164446	0.337853	0.638764	0.000184068	0.286277	13.4588	0	1	0	1	0	0	0	1
612	2022		0.693147	1	0	0	0	9.02451	22.7826	0.894233	0.0385796	0.0871	0.014659	0.343893	0.87334	0.000171231	0.270437	13.4588	0	1	0	1	0	0	0	1
619	2012	C29	0	0	0	0	0	8.69696	22.2246	0.819508	0.0541029	0	0.14035	0.422014	3.54121	0.000310528	0.379393	13.1224	1	1	0	1	0	1	0	0
619	2013	C29	0	0	0	0	0	8.66003	22.1925	0.983225	0.0364106	0	0.139665	0.419194	1.75292	0.000384449	0.40184	13.1224	1	1	0	1	0	1	0	0
619	2014	C29	0	0	0	0	0	8.48894	22.1245	0.807844	0.0290401	0	0.141869	0.428889	3.79029	0.00044872	0.423009	13.2177	1	1	0	1	0	1	0	0
619	2015	C29	0	0	0	0	0	8.38796	22.0866	0.587323	0.0295652	0	0.157242	0.420548	4.88168	0.000532396	0.405077	13.2177	1	1	0	1	0	1	0	0
619	2016	C29	0	0	0	0	0	8.34187	22.0779	0.697225	0.0223849	0	0.145967	0.370674	1.52786	0.000463529	0.375514	13.2177	1	1	0	1	0	1	0	0
619	2017	C29	0	0	0	0	0	8.32713	21.9813	0.907093	0.00399832	0	0.117152	0.360702	1.70385	0.000516111	0.391508	13.2177	1	1	0	1	0	1	0	0
619	2018	C29	0	0	0	0	0	8.34134	22.0554	1.25476	0.000857184	0	0.112557	0.355674	1.50675	0.00054902	0.345771	13.2708	1	1	0	1	0	1	0	0
619	2019	C29	0	0	0	0	0	8.51618	22.122	1.17308	0.00283631	0	0.116674	0.355813	1.49978	0.000539455	0.297944	13.2708	1	1	0	1	0	1	0	0
619	2020	C29	0	0	0	0	0	8.56236	22.2843	1.17702	0.00902404	0	0.11912	0.353174	1.31486	0.00056059	0.273307	13.2534	1	1	0	1	0	1	0	0
619	2021	C29	0	0	0	0	1.94591	8.71761	22.4284	1.15723	-0.0299862	0	0.0843889	0.355813	1.12118	0.000452665	0.285941	13.2534	1	1	0	1	0	1	0	0
619	2022	C29	0	0	0	0	2.07944	8.84776	22.3509	1.05903	-0.0156385	0	0.0680133	0.34589	1.14221	0.000432473	0.305172	13.5541	1	1	0	1	0	1	0	0
622	2015	C35	1.09861	1	0	0	0	5.47979	19.5397	0.056405	-0.153997	0	0.0635883	0.418319	1.95194	0.0120433	0.131842	12.7657	0	1	0	1	0	1	0	0
622	2016	C35	1.09861	1	0	0	0	6.11147	19.9607	0.112686	0.112792	0	0.124578	0.418319	1.82603	0.00868263	0.0487267	12.7657	0	1	0	1	0	1	0	0
622	2017	C35	1.38629	1	0	0	0	6.18937	19.7957	0.180542	-0.0851468	0	0.161997	0.418319	2.20307	0.00464484	0.0507504	12.7657	0	1	0	1	0	1	0	0
622	2018	C35	1.38629	1	0	0	0	7.18634	19.6502	0.102657	0.0247225	0	0.0957312	0.408324	2.95509	0.00132247	0.049335	12.7657	0	1	0	1	0	1	0	0
622	2019	C35	1.38629	1	0	0	0	7.76014	19.5725	0.148559	0.0324843	0	0.0540478	0.402092	4.06735	0.000501402	0.0542038	12.7657	0	1	0	1	0	1	0	0
622	2020	C35	1.09861	1	0	0	1.09861	7.67599	19.7978	0.213775	0.00885027	0	0.0714961	0.395238	2.41228	0.00057624	0.0383596	12.7657		1	0	1	0	1	0	0
622	2021	C35	0.693147	1	0	0	0	7.83759	19.6529	0.189648	0.00458603	0	0.0614428	0.345427	3.12042	0.00048336	0.0393659	12.7657		1	0	1	0	1	0	0
622	2022		0.693147	1	0	0	0	7.53212	19.6051	0.168392	-0.0395845	0	0.0310295	0.295678	2.07883	0.000620338	0.0361587	13.1224		1	0	1	0	1	0	0
623	2012	C27	0	0	0	0	0.693147	7.62539	23.1177	0.704414	0.0617683	0.0836	0.654764	0.27642	3.13491	0.00137426	0.0984868	13.1224	0	1	0	1	0	1	0	0
623	2013	C27	0	0	0	0	0.693147	7.86961	23.217	0.728296	0.0920937	0.0836	0.679365	0.293342	3.24152	0.00134064	0.106918	13.1224	0	1	0	1	0	1	0	0
623	2014	C27	0	0	0	0	0	7.93313	23.3457	0.457935	0.109584	0.2821	0.690292	0.272527	3.37351	0.00134483	0.117622	13.1224	0	1	0	1	0	1	0	0
623	2015	C27	0	0	0	0	0	7.95376	23.7107	0.685226	0.154854	0.2821	0.689542	0.295089	1.44002	0.00151978	0.090595	13.1224	0	1	0	1	0	1	0	0
623	2016	C27	0	0	0	0	0	8.0708	23.7359	0.713785	0.0824324	0.2821	0.710269	0.353251	2.53404	0.00134276	0.104628	13.4588	0	1	0	1	0	1	0	0
623	2017	C27	0	0	0	0	0.693147	8.17746	23.8077	0.804843	0.0874579	0.211	0.707514	0.359728	2.68405	0.00110117	0.0955541	13.4588	0	1	0	1	0	1	0	0
623	2018	C27	0	0	0	0	1.09861	8.27688	23.9284	1.21099	0.0397589	0.2882	0.720013	0.353893	4.43932	0.00113633	0.0838686	13.4588	0	1	0	1	0	1	0	0
623	2019	C27	0	0	0	0	0.693147	8.18808	23.9737	1.13965	0.0552284	0.3075	0.689596	0.353815	5.65949	0.00136614	0.0829297	13.4588	0	1	0	1	0	1	0	0
623	2020	C27	0	0	0	0	1.38629	7.86532	24.0321	1.18977	0.0636416	0.3359	0.594371	0.326014	4.07128	0.00161443	0.0768335	13.4588	0	1	0	1	0	1	0	0
623	2021	C27	0	0	0	0	0.693147	7.89215	24.0929	1.13905	0.0627732	0.3359	0.523079	0.340764	3.93894	0.0012819	0.0704366	13.4588	0	1	0	1	0	1	0	0
623	2022	C27	0	0	0	0	0.693147	8.08583	24.1628	1.3981	0.0597891	0.4349	0.51161	0.340889	2.30545	0.00111224	0.0676074	13.4588	0	1	0	1	0	1	0	0
625	2012	C36	0	0	0	0	0	9.80882	24.5545	0.799715	0.0342411	0.0005	0.184047	0.482848	0.597052	0.000913106	0.252118	15.1505	1	1	0	0	0	1	0	0
625	2013	C36	0	0	0	0	0	9.95036	24.7004	0.621502	0.0697308	0.0005	0.174993	0.438544	0.609635	0.000751498	0.257488	15.0683	1	1	0	0	0	1	0	0
625	2014	C36	0	0	0	0	0.693147	10.2407	24.9673	0.609036	0.122192	0.0007	0.182327	0.415163	0.770518	0.000707178	0.209013	15.0683	1	1	0	0	0	1	0	0
625	2015	C36	0	0	0.693147	0	0	10.4769	25.2165	0.69645	0.124732	0.0005	0.200158	0.432867	0.89428	0.000733727	0.155571	15.0683	1	1	0	0	0	1	0	0
625	2016	C36	0	0	0.693147	0	0	10.598	25.3915	0.822127	0.104904	0.0005	0.178946	0.454679	1.01223	0.000653004	0.145342	15.0625	1	1	0	0	0	1	0	0
625	2017	C36	0	0	1.60944	1	1.79176	10.5621	25.3879	0.931619	0.0678009	0.0005	0.133094	0.473212	1.1133	0.000659936	0.179454	15.0625	1	1	0	0	0	1	0	0
625	2018	C36	0	0	2.07944	1	0	10.3393	25.2611	1.22654	0.00724758	0.0005	0.146532	0.457586	0.959444	0.000419733	0.237045	15.1892	1	1	0	0	0	1	0	0
625	2019	C36	0	0	1.94591	1	0	10.3434	25.3043	1.01048	-0.0277242	0.0005	0.14679	0.457586	1.00764	0.000320876	0.275971	15.1662	1	1	0	0	0	1	0	0
625	2020	C36	0	0	2.56495	1	0.693147	10.5194	25.5184	0.735427	0.030096	0.0005	0.142991	0.421303	1.12535	0.000505354	0.218638	15.1662	1	1	0	0	0	1	0	0
625	2021	C36	0	0	1.60944	1	0.693147	10.7937	25.6315	0.766299	0.0281228	0.052	0.166377	0.387054	1.10749	0.000332851	0.157498	15.1662	1	1	0	0	0	1	0	0
625	2022	C36	0	0	1.09861	1	0.693147	10.9633	25.7072	0.783548	0.0550335	0.0448	0.204888	0.372924	1.27725	0.00029133	0.132468	15.1892	1	1	0	0	0	1	0	0
626	2012	F	0	0	0	0	0	11.7893	22.3429	0.915239	0.0100701	0	0.0182578	0.622687	0.808094	2.92036e-05	0.0168218	13.5924	0	0	0	0	1	0	0	1
626	2013	F	0	0	0	0	0	12.0472	22.4428	0.899148	0.0254752	0	0.00837886	0.622687	0.790077	3.25353e-05	0.0137246	13.7101	0	0	0	0	1	0	0	1
626	2014	F	0	0	0	0	0	12.0807	22.8053	0.871154	0.0848097	0	0.00462233	0.622687	0.916718	4.60005e-05	0.00863489	13.7101	0	0	0	0	1	0	0	1
626	2016	F	0	0	0	0	0	12.5581	23.2356	0.612184	0.0528144	6.5098	0.0230788	0.529902	1.09647	2.39278e-05	0.00540902	14.1871	0	0	0	0	1	0	0	1
626	2017	F	0	0	0	0	1.09861	12.9169	22.921	0.716993	-0.0348836	3.4302	0.00662105	0.529902	1.31583	2.12323e-05	0.00611914	14.221	0	0	0	0	1	0	0	1
626	2018	F	0	0	0	0	0	12.5856	22.6629	0.917841	0.0116825	2.1829	0.007277	0.570842	1.53962	3.05544e-05	0.00636995	14.221	0	0	0	0	1	0	0	1
626	2019	F	0	0	0	0	0	12.2973	22.648	0.867988	0.0284606	4.0892	0.0140238	0.568623	1.62466	2.96875e-05	0.0181889	14.221	0	0	0	0	1	0	0	1
626	2020	F	0	0	0	0	0	12.1924	22.6125	0.614611	0.00805731	4.0892	0.0134676	0.568623	1.40946	2.94278e-05	0.0170288	14.221	0	0	0	0	1	0	0	1
626	2021	F	0	0	0	0	1.94591	12.247	22.7552	0.449146	0.0398559	0.8528	0.0120629	0.586341	1.40883	2.67332e-05	0.0338307	14.221	0	0	0	0	1	0	0	1
626	2022	F	0	0	0	0	1.09861	12.093	22.7765	0.842152	0.022402	0.6564	0.00628469	0.5873	1.28137	2.47858e-05	0.0523696	14.221	0	0	0	0	1	0	0	1
628	2012	K	0	0	0	0	0	8.25075	21.7736	0.715428	0.000151567	0.003	0.203983	0.255221	0.740486	0.000453002	0.0606719	13.1224	1	0	1	0	0	0	0	1
628	2013	E	0	0	0	0	0	8.67979	21.9308	0.759263	0.0059318	0.0023	0.14038	0.255221	0.74585	0.000259215	0.0446393	13.1224	1	0	1	0	0	0	0	0
628	2014	E	0	0	0	0	0.693147	8.62834	22.0266	0.710315	-0.0113343	0	0.111863	0.261064	0.755506	0.00032826	0.0387015	13.1224	1	0	1	0	0	0	0	0
628	2015	E	0	0	0	0	0	8.64886	22.1023	0.581942	0.0128563	0	0.0921384	0.496651	0.826662	0.000351384	0.0261748	13.1224	1	0	1	0	0	0	0	0
628	2016	E	0	0	0	0	0.693147	8.10099	21.9713	0.608278	0.00904089	0	0.149111	0.492736	0.834471	0.000386662	0.0414615	13.1224	1	0	1	0	0	0	0	0
628	2017	E	0	0	0	0	0	7.46296	21.8173	0.730609	0.00900116	0	0.248299	0.477185	1.04849	0.000787292	0.0446429	13.1224	1	0	1	0	0	0	0	0
628	2018	E	0	0	0	0	0	7.9924	21.9825	0.726075	0.024709	0	0.168753	0.477021	1.08863	0.00055533	0.0359973	13.1224	1	0	1	0	0	0	0	0
628	2019	E	0	0	0	0	0	9.28291	22.4951	0.831912	0.0226435	0	0.103264	0.483375	0.893483	0.000252956	0.0168592	13.1224	1	0	1	0	0	0	0	0
628	2020	E	0	0	2.07944	1	1.38629	10.0006	22.8442	0.923934	0.0376098	0	0.103532	0.52347	1.24296	0.000190202	0.00594984	13.1224	1	0	1	0	0	0	0	0
628	2021	E	0	0	2.83321	1	1.09861	10.2644	23.1054	0.898122	0.0180649	0	0.0809231	0.52347	1.17592	0.000167354	0.00329522	13.4298	1	0	1	0	0	0	0	0
628	2022	E	0.693147	1	0.693147	0	0.693147	10.1546	23.339	0.927682	0.0156589	0	0.0851196	0.52347	1.15516	0.000199826	0.00377092	13.4298	1	0	1	0	0	0	0	0
629	2012	B	0	0	0	0	1.09861	9.24514	24.1592	0.736738	0.0191851	0.0016	0.267597	0.479784	0.225796	0.000972067	0.284609	14.5382	1	0	1	0	0	0	0	1
629	2013	B	0	0	0	0	0.693147	9.24083	24.2998	0.951633	0.0168264	0.0007	0.26428	0.479784	0.343458	0.00098968	0.239492	14.2602	1	0	1	0	0	0	0	1
629	2014	B	0	0	0	0	0.693147	9.29886	24.6811	0.834762	-0.135574	0.0007	0.241812	0.479784	0.260919	0.000867096	0.171281	14.7814	1	0	1	0	0	0	0	1
629	2015	B	0	0	0	0	0.693147	8.60087	24.7488	0.822565	-0.0447122	0.0007	0.12883	0.528408	0.25255	0.00105422	0.487361	14.7814	1	0	1	0	0	0	0	1
629	2016	B	0	0	0	0	1.38629	9.36799	22.9872	0.506041	-0.20021	0.003	0.0743238	0.528408	0.599821	0.00126163	0.261786	14.2729	1	0	1	0	0	0	0	1
629	2018	C32	0	0	0	0	2.3979	9.58353	23.1969	0.541851	0.283191	0.0032	0.275152	0.528408	1.29263	0.000123833	0.377186	14.5087	1	1	1	0	0	0	0	1
629	2019	C32	0	0	0	0	2.56495	9.448	23.2856	0.602028	0.117308	0.0032	0.197651	0.528408	2.02076	0.000135374	0.338488	14.5087	1	1	1	0	0	0	0	1
629	2020	C32	0	0	0	0	2.56495	9.23675	23.1785	0.602524	0.0197185	0.0002	0.116364	0.528408	3.2347	0.000162677	0.376108	14.5087	1	1	1	0	0	0	0	1
629	2021	C32	0	0	0	0	2.56495	9.4498	23.0467	0.286177	0.133175	0.0002	0.199213	0.468408	0.696893	0.000160002	0.543093	14.5087	1	1	1	0	0	0	0	1
629	2022	C32	0	0	0	0	2.3979	9.51893	23.2026	0.274929	0.123351	0.0152	0.162974	0.467717	1.38341	0.000131083	0.461037	14.5087	1	1	1	0	0	0	0	1
630	2012	C32	0	0	0	0	0	10.8093	24.4095	0.729507	0.0216308	0.0027	0.0369936	0.533854	0.514949	0.000105959	0.252111	14.7116	1	1	0	1	0	0	0	1
630	2013	C32	0	0	0	0	0	10.713	24.4058	0.945573	0.0138144	0.0027	0.0267241	0.532071	0.500899	0.000112931	0.334747	14.771	1	1	0	1	0	0	0	1
630	2014	C32	0	0	0	0	0.693147	10.8278	24.5719	0.819202	0.00778369	0.0027	0.0300533	0.484403	0.64987	0.000105569	0.323175	14.8088	1	1	0	1	0	0	0	1
630	2015	C32	0	0	0	0	0	10.7996	24.5113	0.692636	-0.0160233	0.0026	0.0259895	0.443987	0.649811	0.00012954	0.35279	14.8088	1	1	0	1	0	0	0	1
630	2016	C32	0	0	0	0	0	10.7974	24.5209	0.7891	0.00730977	0.0022	0.0367003	0.409147	0.621262	0.000106459	0.349002	14.8088	1	1	0	1	0	0	0	1
630	2017	C32	0	0	0	0	0	10.7625	24.5902	0.812266	0.0160454	0.001	0.0495825	0.423487	0.534247	0.000122906	0.310069	14.8088	1	1	0	1	0	0	0	1
630	2018	C32	0	0	0	0	0	10.7306	24.5731	0.976338	0.0206799	0.0011	0.0531334	0.423487	0.630573	0.000116565	0.385853	14.8451	1	1	0	1	0	0	0	1
630	2019	C32	0	0	0.693147	0	0.693147	10.8403	24.5926	0.921115	0.021435	0.0006	0.0445893	0.423487	0.589619	0.000128258	0.362669	14.8451	1	1	0	1	0	0	0	1
630	2020	C32	0	0	0.693147	0	0.693147	10.8875	24.678	0.890865	0.0192034	0.0017	0.0439341	0.427779	0.509428	0.000103164	0.365381	14.8451	1	1	0	1	0	0	0	1
630	2021	C32	0	0	0	0	1.38629	11.2404	24.652	0.79347	0.0673713	0.0018	0.0579901	0.398055	0.683359	8.78858e-05	0.309791	14.8451	1	1	0	1	0	0	0	1
630	2022	C32	0	0	0	0	1.09861	11.1343	24.8413	0.955548	0.0566503	0.0013	0.0586033	0.412404	0.894717	9.99518e-05	0.278049	14.8451	1	1	0	1	0	0	0	1
631	2012	K	0	0	0	0	0	9.6119	23.1282	0.699605	0.0537625	0	0.43518	0.781489	0.174292	0.000181328	0.00188033	13.1224	0	0	0	1	0	0	0	1
631	2013	K	0	0	0	0	0	9.71238	23.2792	0.889302	0.0509037	0	0.393478	0.781489	0.24487	0.000118804	0.00123956	13.1224	0	0	0	1	0	0	0	1
631	2014	K	0	0	0	0	0.693147	10.2773	23.2045	0.796878	0.0470651	0	0.333699	0.733665	0.190447	7.94858e-05	0.00120844	13.1224	0	0	0	1	0	0	0	1
631	2015	K	0	0	0	0	0	10.0003	23.1991	0.525045	0.0274148	0	0.256562	0.74025	0.260957	0.000140447	0.000927864	13.1224	0	0	0	1	0	0	0	1
631	2016	K	0	0	0	0	0	10.0452	23.535	0.747593	0.025316	0	0.276922	0.75135	0.920191	0.000109826	0.000682383	13.3047	0	0	0	1	0	0	0	1
631	2017	K	0	0	0	0	0	10.1941	23.34	0.757977	0.0499597	0	0.219178	0.740058	1.90399	6.61385e-05	0.00408166	13.3047	0	0	0	1	0	0	0	1
631	2018	K	0	0	0	0	0	9.27718	23.2594	0.944182	0.0839462	0	0.468014	0.740058	2.81402	0.000159067	0.00469554	13.4588	0	0	0	1	0	0	0	1
631	2019	K	0	0	0	0	0	8.80043	22.8456	0.903083	0.0615434	0	0.389195	0.740061	4.48745	0.000266777	0.00683818	13.4588	0	0	0	1	0	0	0	1
631	2020	K	0	0	0	0	0	7.94182	22.7312	0.876485	0.0320026	0	0.508368	0.769614	5.14648	0.000666271	0.00422293	13.4588	0	0	0	1	0	0	0	1
631	2021	K	0	0	0	0	0	6.5464	22.9305	0.792395	0.0122851	0	0.4507	0.699463	2.16161	0.00130473	0.0329634	13.4588	0	0	0	1	0	0	0	1
631	2022	K	0	0	0	0	0	6.67398	22.9415	0.813123	0.0186792	0	0.530707	0.664906	1.94605	0.0012822	0.0317313	13.4588	0	0	0	0	1	0	0	1
632	2012	F	0	0	0	0	0	9.65728	22.3184	0.940438	0.00352656	0.0916	0.0588828	0.19463	0.59289	0.000247307	0.0250609	13.2177	1	0	0	0	1	0	0	1
632	2013	F	0	0	0	0	0	9.7532	22.4607	0.899396	0.00418096	0.0916	0.0683934	0.279016	0.662528	0.000220633	0.0222852	13.2177	1	0	0	0	1	0	0	1
632	2015	F	0.693147	1	0	0	0.693147	9.28785	22.6908	0.67898	0.00548408	0.0183	0.0962101	0.28002	0.757284	0.000246018	0.0568986	13.2177	1	0	0	0	1	0	0	1
632	2016	F	0	0	0	0	0.693147	9.37155	22.6338	0.726694	0.00574304	0.0011	0.0794653	0.278496	0.569428	0.000185652	0.0548911	13.2177	1	0	0	0	1	0	0	1
632	2017	F	0	0	0	0	1.38629	9.62503	22.6759	0.836402	0.00889402	0.0011	0.098562	0.259797	0.57287	0.000152884	0.0634202	13.2177	1	0	0	0	1	0	0	1
632	2018	F	0	0	0	0	1.38629	9.60224	22.7739	0.972357	0.00423442	0.0011	0.0888783	0.356664	0.682131	0.000145203	0.0698016	13.2177	1	0	0	0	1	0	0	1
632	2019	F	0	0	0	0	1.09861	9.50721	22.868	0.867974	0.00996569	0.0011	0.0871941	0.356664	0.614179	0.000195693	0.0638238	13.2177	1	0	0	0	1	0	0	1
632	2020	F	0	0	0	0	0	9.81245	22.9405	0.998325	0.0161775	0.0011	0.0568775	0.359456	0.407888	0.000133708	0.0562219	13.2177	1	0	0	0	1	0	0	1
632	2021	F	0	0	0	0	0.693147	9.83276	23.019	1.02451	0.00621595	0.0011	0.0389024	0.32133	0.418905	0.000154339	0.0524101	13.2177	1	0	0	0	1	0	0	1
632	2022		0	0	0.693147	0	1.79176	10.317	23.0021	0.982251	0.00318405	0.0011	0.0366984	0.309815	0.365143	8.45505e-05	0.0546038	13.2177	1	0	0	0	1	0	0	1
633	2012	C38	0	0	0	0	0	6.61428	19.5739	0.126313	0.00747721	0	0.0291869	0.524322	9.06962	0.00120802	0.157944	13.1224	0	1	0	0	1	1	0	0
633	2013	C38	0	0	0	0	0	6.19866	19.5033	0.145818	0.0180733	0	0.062538	0.490565	13.495	0.00154376	0.346489	13.1224	0	1	0	0	1	1	0	0
633	2015	C38	0.693147	1	0	0	0.693147	5.11761	19.2081	0.044356	-0.176815	0.0163	-0.137866	0.341856	7.58077	0.00589302	0.502085	13.1224	0	1	0	0	1	1	0	0
633	2016	C38	0.693147	1	0	0	1.09861	5.60331	20.6883	0.176466	0.042497	0.0607	0.18211	0.378133	26.0815	0.00739245	0.108405	13.9108	0	1	0	0	1	1	0	0
633	2017	C38	0	0	0.693147	0	1.60944	5.69422	20.7126	0.210976	-0.0255684	0	0.196577	0.381586	3.4924	0.00595186	0.102319	13.8155	0	1	1	0	0	1	0	0
633	2018	C38	0	0	0	0	0	6.05191	20.7684	0.394518	0.00127962	0	0.269695	0.381586	0.129944	0.00194971	0.0955828	13.8155	0	1	1	0	0	1	0	0
633	2019	C38	0	0	0	0	0	5.9546	20.8326	0.440663	-0.0105971	0.0008	0.144779	0.371978	0.488208	0.00229744	0.0856064	13.3847	0	1	1	0	0	1	0	0
633	2020	C32	0	0	0	0	0	6.26746	19.2775	0.11469	0.0106122	0.0006	0.131983	0.344635	2.98001	0.00166165	0.383054	13.3847	0	1	1	0	0	0	0	1
633	2021	C32	0	0	0	0	0	6.50741	19.2902	0.101517	0.0141071	0.001	0.12934	0.340626	2.62331	0.000904298	0.36146	13.3847	0	1	1	0	0	0	0	1
633	2022	C32	0	0	0	0	0	6.84938	19.3636	0.080174	0.0237937	0	0.116991	0.328812	2.04701	0.00061482	0.324349	13.3847	0	1	1	0	0	0	0	1
635	2012	C26	0	0	0	0	0	8.00124	22.0114	1.01251	0.00823363	0	0.121851	0.578202	0.551366	0.000573121	0.787682	12.7657	1	1	1	0	0	0	1	0
635	2013	C26	0	0	0	0	0	8.04058	21.9907	0.97113	0.0214587	0	0.145366	0.565361	0.788276	0.000661086	0.750519	12.7657	1	1	1	0	0	0	1	0
635	2014	C26	0	0	0	0	0	7.72225	21.8537	0.837762	0.0157304	0	0.169098	0.554291	1.06983	0.000869824	0.808104	12.7657	1	1	1	0	0	0	1	0
635	2015	C26	0	0	0	0	0	7.61693	21.8687	0.648423	0.00952071	0	0.142464	0.529286	1.84778	0.000940901	0.73329	12.8213	1	1	1	0	0	0	1	0
635	2016	C26	0	0	0	0	0	7.59067	21.9263	0.341693	0.0339189	0	0.203387	0.529041	2.16421	0.00092161	0.633365	12.8213	1	1	1	0	0	0	1	0
635	2017	C26	0	0	0	0	0	7.83148	21.9599	0.708308	0.0275493	0	0.181813	0.569588	2.67304	0.000826117	0.555618	12.8213	1	1	1	0	0	0	1	0
635	2018	C26	0	0	0	0	0	7.86928	21.8662	1.02238	0.00815985	0	0.149514	0.569854	2.22286	0.000830069	0.562477	12.8213	1	1	1	0	0	0	1	0
635	2019	C26	0	0	0	0	0	7.94825	21.8541	1.10305	0.0163884	0	0.134551	0.536169	3.09602	0.000809004	0.512796	12.7657	1	1	1	0	0	0	1	0
635	2020	C26	0	0	0	0	0	7.91518	21.8656	1.12271	0.0223308	0	0.138414	0.536169	3.43989	0.000568244	0.457506	13.1806	1	1	1	0	0	0	1	0
635	2021	C26	0	0	0	0	0	8.0913	21.8403	0.768281	0.0013877	0	0.0961608	0.531648	3.62733	0.000677323	0.44885	12.5062	1	1	1	0	0	0	1	0
635	2022	C26	0	0	0	0	0	7.90433	21.7281	0.881562	-0.134389	0	-0.0746068	0.524804	1.68144	0.000633279	0.481988	12.8739	1	1	1	0	0	0	1	0
636	2012	C39	0	0	0	0	1.38629	7.91856	21.9108	0.627277	0.0213339	0	0.15503	0.247746	1.04153	0.00106205	0.347544	13.4298	1	1	0	0	1	1	0	0
636	2013	C39	0	0	0	0	0	7.99299	22.0762	0.729997	0.024858	0	0.158138	0.247746	1.07536	0.00106987	0.298639	13.4298	1	1	0	0	1	1	0	0
636	2014	C39	0	0	0	0	0.693147	8.00804	22.3492	0.643672	0.0212491	0	0.168628	0.287666	2.05409	0.00111867	0.234809	13.5278	1	1	0	0	1	1	0	0
636	2015	C39	1.09861	1	0	0	1.38629	7.74596	22.6085	0.591369	0.0111008	0	0.186619	0.2652	1.67444	0.00149036	0.242638	13.5278	1	1	0	0	1	1	0	0
636	2016	C39	0.693147	1	0	0	1.38629	8.07755	22.6168	0.634364	0.0141208	0	0.200426	0.2652	1.38527	0.00145829	0.262057	13.9978	1	1	0	0	1	1	0	0
636	2017	C39	0.693147	1	0	0	1.38629	8.21998	22.5684	0.535249	0.0404028	0	0.237749	0.252295	1.39016	0.00109964	0.33214	13.5278	1	1	0	0	1	1	0	0
636	2018	C39	0.693147	1	0	0	0.693147	8.52154	22.6753	0.637996	0.153875	0	0.416695	0.240535	2.18798	0.000627343	0.308088	13.9978	1	1	0	0	1	1	0	0
636	2019	C39	0.693147	1	0	0	1.38629	8.20588	22.6694	0.476538	0.0495878	0	0.239834	0.219191	2.55427	0.000692663	0.304675	13.9978	1	1	0	0	1	1	0	0
636	2020	C39	0	0	0	0	1.38629	8.42675	22.8956	0.266951	0.0472092	0	0.296501	0.259507	1.55902	0.000759245	0.272861	13.9978	1	1	0	0	1	1	0	0
636	2021	C39	0	0	0	0	1.09861	8.48436	23.1054	0.355876	0.0969986	0	0.319131	0.225212	0.963369	0.000696181	0.291166	13.9978	1	1	0	0	1	1	0	0
636	2022	C39	0	0	0	0	0.693147	8.1357	23.4843	0.767248	0.0254803	0	0.179684	0.322402	2.50673	0.000749437	0.281926	13.9978	1	1	0	0	1	1	0	0
638	2012	K	0	0	0	0	0	6.24343	20.7436	0.543303	0.00545584	0	0.134961	0.446141	1.09319	0.0041882	0.00337495	13.2177	0	0	0	0	1	0	0	1
638	2013	F	0	0	0	0	0	7.01004	20.9019	0.545941	-0.0121504	0	0.115645	0.440071	0.94386	0.00204628	0.00242423	13.2177	0	0	0	0	1	0	0	1
638	2016	F	0	0	0	0	2.99573	7.34932	21.1248	0.258003	0.0068093	0.5348	0.119241	0.44029	0.314351	0.000932807	0.00122425	13.2177	0	0	0	0	1	0	0	1
638	2018	I	0	0	1.09861	1	3.2581	6.9883	20.4331	0.329535	-0.173498	0.5348	0.453331	0.436054	0.576084	0.00380628	0.005561	13.2177	0	1	0	0	1	1	0	0
638	2019	I	0	0	0	0	2.3979	6.96363	20.0851	0.288426	0.0252986	0.5348	0.461441	0.43287	0.659435	0.00193758	0.00731987	13.2177	0	1	0	1	0	1	0	0
638	2020	I	0	0	0	0	2.63906	6.90152	20.0448	0.22823	-0.0394084	0.5348	0.277661	0.402746	0.381505	0.00248604	0.00714337	13.5924	0	1	0	1	0	1	0	0
638	2021	I	0	0	0.693147	0	0	7.4205	20.1465	0.307687	0.151582	0.5348	0.292416	0.393943	0.806367	0.00107712	0.0772984	13.5924	1	1	0	1	0	1	0	0
638	2022		0	0	0.693147	0	0	6.67154	20.1568	0.22499	0.0137658	0.5339	0.208402	0.383079	0.485597	0.00117286	0.0869452	13.5924	1	1	0	1	0	1	0	0
639	2012	C13	0.693147	1	0	0	0	8.42595	21.0815	0.63754	0.100734	0	0.226457	0.540978	1.23765	0.000489529	0.406847	12.8479	0	0	0	0	1	0	0	1
639	2013	C13	0.693147	1	0	0	0	8.42669	21.0854	0.583735	0.12622	0	0.246988	0.540978	1.88771	0.000476288	0.396431	12.8479	0	0	0	0	1	0	0	1
639	2014	C13	0	0	0	0	0	8.15643	21.3436	0.503798	0.0712958	0	0.276585	0.540978	1.37777	0.000517829	0.329823	13.2357	0	0	0	0	1	0	0	1
639	2015	C13	0	0	0	0	0	8.37599	21.2786	0.257937	0.0812196	0	0.28006	0.545259	1.73401	0.000477094	0.301521	13.2879	0	0	0	0	1	0	0	1
639	2016	C13	0	0	0	0	0.693147	8.67336	22.8439	0.54224	0.0255379	0	0.289323	0.624015	0.628042	0.0006408	0.0816329	13.8304	0	0	0	0	1	0	0	1
639	2017	C13	0	0	0	0	0	9.1637	22.7654	0.613221	0.0493636	0.1595	0.355903	0.634133	0.358773	0.000499504	0.0935251	14.8871	0	0	0	0	1	0	0	1
639	2018	C13	0	0	0	0	0	9.22387	23.0534	1.00562	0.059166	0.3803	0.363029	0.557453	1.18932	0.000315437	0.0669257	14.9141	0	0	0	0	1	0	0	1
639	2019	C13	0	0	0	0	0	9.22491	22.8201	0.911854	-0.104564	0.3804	0.328379	0.573039	1.17275	0.000341783	0.0812042	15.1505	0	0	0	0	1	0	0	1
639	2020	C13	0	0	0.693147	0	0	9.25122	22.7676	0.7058	0.0428305	0.0002	0.26009	0.573039	1.2949	0.000334311	0.0801407	15.0094	0	0	0	0	1	0	0	1
639	2021	C13	0	0	0.693147	0	0	9.37187	22.7663	0.882614	0.0290796	0.0002	0.22666	0.573039	1.14306	0.000368516	0.0743345	14.0779	0	0	0	0	1	0	0	1
639	2022		0	0	0	0	0.693147	9.3096	22.6799	0.858466	-0.100996	0.0002	0.153364	0.573039	1.04694	0.000393747	0.08654	14.3461	0	0	0	0	1	0	0	1
650	2012	C27	0	0	0	0	0	8.33599	21.4628	0.365261	0.149359	0	0.3939	0.508448	2.53783	0.000687426	0.156397	13.5924	0	1	0	1	0	1	0	0
650	2013	C27	0	0	0	0	0	8.16951	21.5686	0.4051	0.0976593	0.0353	0.444523	0.48464	2.73951	0.00105832	0.13926	13.5924	0	1	0	1	0	1	0	0
650	2014	C27	0	0	0	0	0	8.2405	21.6777	0.32136	0.131492	0.0353	0.457332	0.445408	2.6982	0.000945013	0.198506	13.5924	0	1	0	1	0	1	0	0
650	2015	C27	0	0	0	0	3.3673	8.31333	21.8727	0.231369	0.15142	0.0372	0.445603	0.349117	2.57874	0.000749377	0.183453	13.8155	0	1	0	1	0	1	0	0
650	2016	C27	0	0	0	0	2.70805	8.608	22.0752	0.411633	0.122712	0.0372	0.366133	0.351866	2.39518	0.000700923	0.17339	14.0624	0	1	0	1	0	1	0	0
650	2017	C27	0	0	0	0	3.29584	8.67972	22.1506	0.583189	0.109845	0.0372	0.389347	0.336878	2.8234	0.000790619	0.160326	14.0624	0	1	0	1	0	1	0	0
650	2018	C27	0	0	0	0	0.693147	8.83185	22.2529	0.627824	0.132988	6.2392	0.429849	0.372022	3.43297	0.000649815	0.135682	14.0624	0	1	0	1	0	1	0	0
650	2019	C27	0	0	0	0	0	8.91535	22.3296	0.600808	0.129007	6.2392	0.42315	0.331314	4.4881	0.000593669	0.110715	14.0624	0	1	0	1	0	1	0	0
650	2020	C27	0	0	0	0	1.09861	8.83387	22.5646	0.718541	0.116508	5.519	0.401847	0.30384	4.93895	0.000545394	0.0810154	14.1376	0	1	0	1	0	1	0	0
650	2021	C27	0	0	0	0	4.39445	9.0019	22.6559	0.502989	0.121074	0.0329	0.379747	0.310427	3.56606	0.000523919	0.0759467	14.2729	0	1	0	1	0	1	0	0
650	2022	C27	0	0	0	0	3.80666	8.93264	22.7556	0.780083	0.0978789	5.4878	0.366167	0.295947	3.54065	0.000604484	0.107314	14.2729	0	1	0	1	0	1	0	0
651	2012	C38	0	0	0	0	0	10.8243	25.4014	0.68806	0.0772485	0.9599	0.262929	0.287912	0.860742	0.000408373	0.11807	14.9469	1	1	0	0	1	1	0	0
651	2013	C38	0	0	0	0	0	10.7932	25.6189	0.682083	0.090652	0.9462	0.322369	0.294421	0.939047	0.000429037	0.104966	14.9469	1	1	0	0	1	1	0	0
651	2014	C38	0	0	0	0	3.2581	10.8699	25.7746	0.702862	0.0983189	0.9431	0.361003	0.299669	1.02912	0.000349775	0.095623	14.9469	1	1	0	0	1	1	0	0
651	2015	C38	0	0	0	0	2.83321	10.7644	25.809	0.654753	0.0794123	0.9659	0.324597	0.301242	0.989791	0.000516522	0.095436	15.0964	1	1	0	0	1	1	0	0
651	2016	C38	0	0	0.693147	0	2.3979	10.8207	25.9293	0.663514	0.0902417	0.9999	0.327018	0.312501	1.05525	0.000506817	0.096955	15.1918	1	1	0	0	1	1	0	0
651	2017	C38	0	0	0.693147	0	2.30259	11.1381	26.0938	0.524932	0.113297	0.9965	0.328577	0.355484	1.05068	0.00040942	0.0812557	15.1918	1	1	0	0	1	1	0	0
651	2018	C38	0	0	2.30259	1	2.89037	11.1932	26.2497	0.674802	0.113166	0.9977	0.302282	0.35299	1.1396	0.00022036	0.0731818	15.1918	1	1	0	0	1	1	0	0
651	2019	C38	0	0	2.83321	1	2.89037	11.254	26.3686	0.50236	0.09295	1.011	0.275815	0.42009	1.11624	0.000191551	0.0675753	15.1918	1	1	0	0	1	1	0	0
651	2020	C38	0	0	2.19722	1	2.70805	11.2363	26.3553	0.523857	0.0792587	0.9927	0.261417	0.41897	1.1721	0.000214257	0.0680133	15.1918		1	0	0	1	1	0	0
651	2021	C38	0	0	2.3979	1	3.3322	11.2059	26.4903	0.743546	0.0762568	0.8852	0.242814	0.347427	0.928883	0.000215642	0.0975873	15.1918		1	0	0	1	1	0	0
651	2022		0	0	2.19722	1	3.29584	11.1974	26.5955	0.816906	0.0682199	0.9297	0.260355	0.343043	1.0021	0.000278747	0.0952526	15.1918		1	0	0	1	1	0	0
652	2012	F	0	0	0	0	0	9.32029	23.5253	0.870752	0.0023499	0.0063	0.140241	0.350809	0.431602	0.000361198	0.0408391	13.9978	1	0	0	0	1	0	0	1
652	2013	F	0	0	0	0	0	9.93886	23.7093	0.840094	0.0221645	0.0063	0.0994406	0.358324	0.465074	0.000219085	0.0261312	13.9978	1	0	0	0	1	0	0	1
652	2014	F	0	0	0	0	0	9.65623	23.8794	0.763608	0.0278653	0.0061	0.188097	0.375269	0.476207	0.000407209	0.012465	15.0909	1	0	0	0	1	0	0	1
652	2015	F	0	0	0	0	0.693147	10.1163	24.0757	0.812907	0.0121936	0.0061	0.0816275	0.372516	0.516206	0.000248899	0.00834103	14.838	1	0	0	0	1	0	0	1
652	2016	F	0	0	0	0	0.693147	10.4023	24.1913	0.894439	0.0141121	0.0061	0.0659846	0.369041	0.627367	0.000144918	0.0143874	15.1373	1	0	0	0	1	0	0	1
652	2017	F	0	0	0	0	0.693147	10.591	24.214	0.951809	0.0168184	0.0061	0.0558855	0.367725	0.551094	9.68834e-05	0.0143211	15.1292	1	0	0	0	1	0	0	1
652	2018	F	0	0	0	0	0	10.603	24.2676	1.02112	0.0133295	0.0095	0.0539732	0.367725	0.468245	9.58574e-05	0.0126411	15.1892	1	0	0	0	1	0	0	1
652	2019	F	0	0	0	0	0	10.6629	24.2565	1.01262	0.00963238	0.0061	0.0731933	0.367431	0.458146	0.000118283	0.0121251	15.1892	1	0	0	0	1	0	0	1
652	2020	F	0	0	0	0	0	10.5566	24.2382	0.957555	0.00244154	0.0028	0.0582173	0.367055	0.509289	0.000111833	0.0130581	15.1211	1	0	0	0	1	0	0	1
652	2021	F	0	0	0	0	0	10.6777	24.3411	1.00135	0.0044607	0.0028	0.0543353	0.36996	0.541864	9.39305e-05	0.011452	15.1918	1	0	0	0	1	0	0	1
652	2022	F	0	0	0	0	0	10.6452	24.4135	1.01599	0.00445401	0.0007	0.0676765	0.367721	0.576052	0.000101792	0.0101855	15.1662	1	0	0	0	1	0	0	1
655	2012	B	0	0	0	0	0	7.93979	21.928	0.511698	0.0673547	0	0.370961	0.602259	2.30192	0.00149226	0.0864336	13.1224	1	0	0	0	1	0	0	1
655	2013	B	0	0	0	0	0	7.94538	22.0028	0.779412	0.076149	0	0.37988	0.599226	2.12838	0.0013263	0.169706	13.1224	1	0	0	0	1	0	0	1
655	2014	B	0	0	0	0	0	7.90553	22.0227	0.631953	0.0592263	0	0.329101	0.60099	2.42745	0.00158977	0.156871	13.1224	1	0	0	0	1	0	0	1
655	2015	B	0	0	0	0	0	7.23543	21.9558	0.568458	0.0014788	0	0.107163	0.601481	3.30057	0.00198238	0.160218	13.1224	1	0	0	0	1	0	0	1
655	2016	B	0	0	0	0	0	7.08007	21.8228	0.499199	-0.177073	0	0.0669051	0.600055	2.11044	0.00229759	0.144172	13.1224	1	0	0	0	1	0	0	1
655	2017	B	0	0	0	0	0	7.69728	21.701	0.529633	-0.113139	0	0.34439	0.59974	2.80955	0.00128476	0.115303	13.1224	1	0	0	0	1	0	0	1
655	2018	B	0	0	0	0	0	7.71342	21.7223	1.17324	0.0372042	0	0.241152	0.598447	3.61734	0.00120782	0.108521	13.1224	1	0	0	0	1	0	0	1
655	2019	B	0	0	0	0	0	7.96792	21.7841	0.804575	0.0645326	0	0.253603	0.600284	4.68447	0.0009235	0.0993819	13.1224	1	0	0	0	1	0	0	1
655	2020	B	0	0	0	0	0	8.05983	21.8565	0.636707	0.077515	0	0.283076	0.604509	6.12054	0.0010995	0.0878738	13.1224	1	0	0	0	1	0	0	1
655	2021	B	0	0	0.693147	0	0.693147	8.31116	21.9434	0.627111	0.0436643	0	0.304161	0.605738	7.67295	0.00232989	0.0789447	13.1224	1	0	0	0	1	0	0	1
655	2022	B	0	0	0	0	0	8.02689	21.9843	0.807927	0.0600255	0	0.211243	0.604142	9.59185	0.00103941	0.0775994	13.1224	1	0	0	0	1	0	0	1
656	2012	K	0	0	0	0	0	9.76621	24.6748	0.949242	0.0279292	18.6055	0.358718	0.482764	0.427231	0.000485435	0.00901077	13.8643	0	0	0	0	0	0	0	1
656	2013	K	0	0	0	0	0	10.147	24.8568	1.00328	0.0165419	18.6055	0.260326	0.482764	0.299996	0.000395962	0.00870162	14.3461	0	0	0	0	0	0	0	1
656	2014	K	0	0	0	0	1.38629	9.99262	25.1308	0.937552	0.0119484	15.8374	0.230141	0.40572	0.282703	0.000415228	0.0138052	14.5574	0	0	0	0	0	0	0	1
656	2015	K	0	0	0	0	1.09861	9.87311	25.2829	0.937854	0.013891	13.0691	0.284122	0.303517	0.251568	0.00047562	0.0264613	14.6484	0	0	0	0	0	0	0	1
656	2016	K	0	0	0	0	1.94591	10.3503	25.4169	0.966739	0.0174837	1.5572	0.207406	0.404901	0.579461	0.000386864	0.0244067	14.6484	0	0	0	0	0	0	0	1
656	2017	K	0	0	0	0	0	10.42	25.7818	0.975385	0.0171439	1.1543	0.213168	0.408448	0.438541	0.000435066	0.0155164	14.8451	0	0	0	0	0	0	0	1
656	2018	K	0	0	0	0	0	10.5551	26.1644	1.02047	0.0207209	1.2202	0.285716	0.42175	0.381516	0.000567382	0.0102883	14.9787	0	0	0	0	0	0	0	1
656	2019	K	0	0	0	0	0	10.8802	26.4966	1.03525	0.0230199	1.2771	0.288363	0.42175	0.383088	0.00039683	0.0136132	15.0683	0	0	0	0	0	0	0	1
656	2020	K	0	0	1.09861	1	0	11.158	26.6665	1.10182	0.0276177	1.1329	0.231621	0.361885	0.406171	0.000343744	0.0106995	15.0683	0	0	0	0	0	0	0	1
656	2021	K	0	0	0.693147	0	0	11.4665	26.6404	1.1684	0.0177757	0.4653	0.1722	0.292798	0.376803	0.000281329	0.00865194	15.0964	0	0	0	0	0	0	0	1
656	2022		0	0	0	0	0.693147	10.9532	26.4255	1.10528	-0.0706364	0.5032	0.0649432	0.23616	0.28657	0.000482796	0.00870989	14.9942	0	0	0	0	0	0	0	1
657	2013	C32	0	0	0	0	0	9.29843	22.987	0.934941	0.0406945	0	0.112261	0.742159	0.684558	0.000470227	0.290325	14.0779	1	1	0	0	1	0	0	1
657	2014	C32	0	0	0	0	0	9.00836	22.7797	0.837468	0.00536127	0	0.110424	0.663423	0.73894	0.000544167	0.347063	14.1007	1	1	0	0	1	0	0	1
657	2016	C32	0	0	0	0	1.09861	8.57503	22.6519	0.760554	0.0078069	0	0.203489	0.631007	0.711219	0.000985761	0.34766	14.1007	1	1	0	0	1	0	0	1
657	2017	C32	0	0	1.09861	1	1.60944	8.8491	22.727	0.823915	0.025356	0	0.205995	0.628411	0.832402	0.000871342	0.303864	14.1007	1	1	0	0	1	0	0	1
657	2018	C32	0	0	0	0	0.693147	9.06258	22.7297	0.940832	0.0273671	0	0.191998	0.632519	0.792129	0.000576199	0.313927	13.9553	1	1	0	0	1	0	0	1
657	2019	C32	0	0	0	0	0.693147	9.0683	22.7133	0.794016	0.0270132	0	0.20698	0.643046	0.771126	0.000566439	0.306104	13.9978	1	1	0	0	1	0	0	1
657	2020	C32	0	0	0	0	0.693147	9.1923	22.9428	0.822782	0.0358972	0	0.184103	0.567488	0.987298	0.000535819	0.321269	13.9978	1	1	0	0	1	0	0	1
657	2021	C32	0	0	0	0	0	9.37565	23.0075	0.48883	0.0671433	0.2498	0.193773	0.528602	1.0113	0.000470209	0.317359	13.9978	1	1	0	0	1	0	0	1
657	2022		0	0	0	0	0.693147	9.43011	23.1811	0.548424	0.061462	0.2439	0.175314	0.544557	1.0528	0.000480324	0.29132	13.9978	1	1	0	0	1	0	0	1
659	2012	C29	0	0	0	0	0	8.2809	22.5055	0.87044	-0.0341958	0	0.14201	0.300963	1.08439	0.000811811	0.541759	15.2695	0	1	0	0	1	1	0	0
659	2013	C29	0	0	0	0	0	8.03967	22.2393	0.650029	-0.226113	0	0.126873	0.28684	0.872815	0.00123739	0.523081	15.2458	0	1	0	0	1	1	0	0
659	2014	C29	0	0	0	0	0	7.92342	22.0371	0.531324	0.00906912	0	0.184137	0.2583	0.473222	0.000942992	0.575282	15.1211	0	1	0	0	1	1	0	0
659	2015	C29	0	0	0	0	0	7.73879	21.8787	0.334552	-0.0207856	0	0.187257	0.131503	0.420305	0.00111675	0.611126	15.0094	0	1	0	0	1	1	0	0
659	2016	C29	0	0	0	0	0	7.69657	21.6855	0.235881	-0.203135	0	0.157304	0.13122	0.242749	0.0017858	0.573927	14.8802	0	1	0	0	1	1	0	0
659	2017	C29	0	0	0	0	0	7.72826	21.6967	0.327731	0.0345412	0	0.212679	0.147099	0.784436	0.000767895	0.523018	14.8802	0	1	0	0	1	1	0	0
659	2018	C29	0	0	0	0	0	7.75688	21.6328	0.347384	0.00788294	0	0.197562	0.242713	0.350706	0.000963956	0.521949	15.2741	0	1	0	0	1	1	0	0
659	2019	C29	0	0	0.693147	0	0	7.73706	21.5888	0.455557	0.00660958	0	0.208286	0.287568	0.278396	0.000897457	0.523935	14.8802	0	1	0	0	1	1	0	0
659	2020	C29	0	0	0.693147	0	0	7.57525	21.511	0.36351	-0.078888	0	0.202566	0.287568	0.286425	0.00112478	0.483807	14.8802	0	1	0	0	1	1	0	0
659	2021	C29	0	0	0.693147	0	0	7.6959	21.564	0.325201	0.0108146	0	0.21115	0.277488	0.288019	0.000963207	0.485877	14.8802	0	1	0	0	1	1	0	0
659	2022		0	0	0	0	0	7.60623	21.4806	0.36453	-0.0841132	0	0.144588	0.278575	0.181904	0.000872243	0.523539	14.5087	0	1	0	0	1	1	0	0
661	2012	C27	0	0	0	0	0	8.01437	21.5624	0.256173	0.183689	0.0029	0.819497	0.314776	0.960931	0.00152799	0.257448	13.2177	1	1	0	1	0	1	0	0
661	2013	C27	0	0	0	0	0	8.1124	21.7545	0.182404	0.164487	0.0029	0.812297	0.270834	1.22813	0.00152098	0.25284	13.4588	1	1	0	1	0	1	0	0
661	2014	C27	0	0	0	0	0	8.20363	21.8702	0.252083	0.149239	0.0029	0.765378	0.282739	1.20528	0.00150804	0.224793	13.4588	1	1	0	1	0	1	0	0
661	2015	C27	0	0	0	0	0.693147	8.26284	22.0623	0.22191	0.154653	0.0695	0.783212	0.275371	1.31847	0.00154606	0.184075	13.4588	1	1	0	1	0	1	0	0
661	2016	C27	0	0	0	0	0.693147	8.42412	22.5484	0.298626	0.135127	0.0833	0.79421	0.268309	2.35707	0.00156614	0.118562	13.653	1	1	0	1	0	1	0	0
661	2017	C27	0	0	0	0	0.693147	8.64473	22.7182	0.22099	0.136867	0.1023	0.819439	0.26883	1.73137	0.00141512	0.1518	13.8155	1	1	0	1	0	1	0	0
661	2018	C27	0	0	0	0	0	8.88587	22.9654	0.286614	0.174514	0.0583	0.851024	0.27212	1.61414	0.000653443	0.126498	13.8155	1	1	0	1	0	1	0	0
661	2019	C27	0	0	0	0	0	9.12307	23.2665	0.156457	0.212265	0.0644	0.851945	0.335693	2.17297	0.000621172	0.119003	14.0387	1	1	0	1	0	1	0	0
661	2020	C27	0	0	0	0	0	9.18216	23.5473	0.101796	0.223747	0.0671	0.866899	0.315632	2.32724	0.00055809	0.118043	14.0387	1	1	0	1	0	1	0	0
661	2021	C27	0	0	0	0	0	9.34794	23.8375	0.20539	0.19804	0.0657	0.876057	0.298881	2.5642	0.000588981	0.0987391	14.0387	1	1	0	1	0	1	0	0
661	2022	C27	0	0	0	0	0	9.3911	23.9824	0.360111	0.173656	0.0876	0.880031	0.302472	2.79344	0.000652328	0.123998	14.0387	1	1	0	1	0	1	0	0
663	2012	A	0	0	0	0	0	6.92227	21.1016	0.567457	0.00926468	0.0011	0.167243	0.43855	0.254819	0.00101541	0.269194	13.4298	1	0	0	0	1	0	0	1
663	2013	A	0	0	0	0	0	6.96617	21.0269	0.454748	0.00978796	0.0011	0.127785	0.426847	0.151656	0.00102342	0.269505	13.4298	1	0	0	0	1	0	0	1
663	2014	A	0	0	0	0	0	6.99631	21.0387	0.408304	-0.0132329	0.0011	0.160284	0.424537	0.182239	0.00104581	0.254285	13.4298	1	0	0	0	1	0	0	1
663	2015	A	0	0	0	0	0	7.38753	22.1055	0.683589	0.0177402	0.0007	0.239273	0.396779	0.64986	0.00083576	0.115212	13.7953	1	0	0	0	1	0	0	1
663	2016		0	0	0	0	1.38629	8.04254	22.1874	0.68488	0.0310842	15.7799	0.220408	0.396745	0.789129	0.000795666	0.086365	14.4033	1	0	0	0	1	0	0	1
663	2017	C21	0	0	0	0	2.19722	7.59131	22.1496	0.647999	0.0167971	15.7799	0.248634	0.396745	0.736466	0.000860858	0.195151	14.4033	1	0	0	0	1	0	0	1
663	2018	C21	0	0	0	0	2.19722	7.10821	21.7488	0.781213	-0.385411	15.7799	0.0751439	0.396745	0.375656	0.00170434	0.303931	14.4033	1	0	0	0	1	0	0	1
663	2019	C21	0	0	0	0	1.79176	7.06774	21.67	0.77122	-0.0882624	14.4526	0.17585	0.386719	0.246365	0.00156532	0.304946	14.4033	1	0	0	0	1	0	0	1
663	2020	C21	0	0	0	0	1.79176	7.41161	21.1412	0.721654	0.0179301	0.0013	0.15764	0.383664	0.526932	0.00145584	0.131046	14.4033	1	0	0	0	1	0	0	1
663	2021	C21	0	0	0	0	1.79176	7.32325	21.0348	0.383686	0.0378969	0.0013	0.305851	0.378897	0.592661	0.000954526	0.124943	13.8155	1	0	0	0	1	0	0	1
663	2022	C21	0	0	0	0	1.79176	7.8237	20.8441	0.401098	0.215409	0.0013	0.443142	0.334035	2.01427	0.000583373	0.108347	13.9978	1	0	0	0	1	0	0	1
665	2012	R	0	0	0	0	0.693147	7.1742	21.8992	0.853902	0.085535	0.0017	0.459463	0.437674	0.474757	0.00146595	0.55282	13.1224	1	0	0	1	0	0	1	0
665	2013	R	0	0	0	0	0.693147	7.21042	21.9213	0.777908	0.0561127	0.0011	0.476364	0.437674	0.540459	0.00163293	0.6054	13.3047	1	0	0	1	0	0	1	0
665	2014	R	0	0	0	0	0.693147	7.36792	22.7402	0.880916	0.0452299	0	0.465248	0.399297	0.626373	0.00204539	0.527219	13.5924	1	0	0	1	0	0	1	0
665	2015	R	0	0	0.693147	0	2.30259	7.65652	22.7521	0.763081	0.0491514	0	0.480384	0.367337	0.386213	0.00171077	0.567194	13.4588	1	0	0	1	0	0	1	0
665	2016	R	0	0	0	0	2.07944	7.66774	22.8175	0.772849	0.0380575	0	0.453852	0.367337	0.457712	0.0017218	0.567281	13.7212	1	0	0	1	0	0	1	0
665	2017	R	0	0	0	0	0	7.69012	22.9703	0.978082	0.0377037	0.0112	0.462846	0.367337	0.349037	0.00172185	0.536516	13.7212	1	0	0	1	0	0	1	0
665	2018	R	0	0	1.38629	1	1.09861	7.71607	23.1352	1.23354	0.0201736	0.0112	0.393503	0.367337	0.696074	0.00138452	0.501834	13.9978	1	0	0	1	0	0	1	0
665	2019	R	0	0	0.693147	0	1.09861	7.64738	23.1968	1.16973	0.0105462	0.0076	0.358546	0.339556	0.562435	0.00145126	0.516938	13.7642	1	0	0	1	0	0	1	0
665	2020	R	0	0	0.693147	0	1.94591	7.5617	23.1806	1.19471	-0.0569563	0.0074	0.172061	0.333224	0.676368	0.00156674	0.509435	13.7321	1	0	0	1	0	0	1	0
665	2021	R	0	0	0.693147	0	1.79176	7.46671	23.1939	0.969682	-0.0374979	0.006	0.110423	0.322555	0.676324	0.00142995	0.515801	13.7101	1	0	0	1	0	0	1	0
665	2022	R	0	0	0	0	2.19722	7.46917	23.187	0.895296	-0.0499276	0.0042	0.0791259	0.278471	0.684317	0.001406	0.526551	13.4588	1	0	0	1	0	0	1	0
668	2012	K	0	0	0	0	0	6.63296	20.8325	0.712547	0.00450229	0.0042	0.771527	0.43726	0.724098	0.00222781	0.00386707	12.8992	0	0	0	0	1	0	0	1
668	2014	K	0	0	0	0	0	5.46905	21.2463	0.632614	-0.0291693	0	0.592421	0.460046	2.39893	0.0280921	0.00233621	13.1224	0	0	0	0	1	0	0	1
668	2015	K	0	0	0	0	0	6.99748	21.0888	0.287143	0.0186244	0	0.732491	0.426232	0.200308	0.00302931	0.00323812	13.1224	0	0	0	0	1	0	0	1
668	2016	K	0	0	0	0	0	6.57721	21.4295	0.404476	-0.024395	0	0.721805	0.454414	1.16779	0.0275224	0.00206521	13.1224	0	0	0	0	1	0	0	1
668	2017	K	0	0	0	0	0	7.89239	21.539	0.601393	0.00648052	0	0.412698	0.463859	0.511199	0.00154784	0.00151571	13.1224	0	0	0	0	1	0	0	1
668	2018	K	0	0	0	0	0	7.82835	21.7597	0.850756	0.00433566	0	0.49639	0.461177	0.31743	0.00191409	0.0014079	13.1224	0	0	0	0	1	0	0	1
668	2019	K	0	0	0	0	0	8.4009	21.7215	0.757941	0.0152501	0	0.544583	0.431565	0.253066	0.00106653	0.00124542	13.1224	0	0	0	0	1	0	0	1
668	2020	K	0	0	0	0	0	7.0683	21.6862	0.735702	-0.00873286	0	0.289889	0.473929	0.394219	0.00411931	0.000927453	13.1224	0	0	0	0	1	0	0	1
668	2021	K	0	0	0	0	0	7.6633	22.0704	0.890769	0.0864886	0	0.183079	0.477771	0.83918	0.00271244	0.00142158	13.9978	0	0	0	0	1	0	0	1
668	2022		0	0	0	0	0	8.79274	21.5682	0.79635	-0.012364	0	0.257011	0.451623	0.251137	0.00126111	0.000740371	14.221	0	0	0	0	1	0	0	1
670	2013	K	0	0	0	0	0	7.19194	19.823	0.155651	0.0126265	0	0.571088	0.428128	1.13107	0.0018136	0.00237381	13.1224	0	0	0	1	0	0	0	1
670	2014	C39	0	0	0	0	3.09104	7.31895	20.4503	0.150643	0.00836757	0	0.38641	0.402436	1.878	0.00354369	0.00796997	13.9108	0	1	0	1	0	1	0	0
670	2015	C39	0	0	0	0	2.89037	7.43896	20.353	0.075112	-0.0184831	0.2698	0.278033	0.387917	1.84797	0.00306912	0.0673103	14.0779	0	1	0	1	0	1	0	0
670	2017	C39	0	0	1.09861	1	2.07944	6.80239	19.9178	0.103443	-0.508423	0.2698	0.395363	0.358465	1.54723	0.00552413	0.302058	14.604	0	1	0	1	0	1	0	0
670	2018	C39	0	0	0	0	1.94591	5.98113	19.3487	0.125445	-0.491404	0	0.056716	0.263536	1.08689	0.00477481	0.498152	14.5087	0	1	0	1	0	1	0	0
670	2019	C39	0.693147	1	0	0	1.38629		17.8787	0.042737	-1.33305	0	-0.0383567	0.277094	0.240993	0.180417	0.0180523	14.221	0	1	0	1	0	1	0	0
670	2022		0.693147	1	1.38629	1	1.60944	10.3646	21.4051	0.329633	0.0367426	0	0.0680561	0.281992	0.795383	0.000174439	0.00191722	14.771	0	1	0	1	0	1	0	0
672	2013	C30	0	0	0	0	0	8.12304	21.9205	0.843243	0.152994	0	0.24185	0.646969	0.49805	0.000453701	0.582337	13.017	0	0	1	0	0	0	1	0
672	2014	C30	0	0	0	0	0	8.17632	22.0714	0.727155	0.103176	0	0.291595	0.657318	0.456976	0.000484215	0.520517	13.7101	0	0	1	0	0	0	1	0
672	2015	C30	0	0	0	0	1.79176	7.8034	22.2661	0.777636	0.0140879	0.0157	0.167131	0.657337	0.373631	0.0007317	0.529508	13.7101	0	0	1	0	0	0	1	0
672	2016	C30	0	0	0	0	2.07944	8.18355	22.4834	0.407938	0.0265077	0.012	0.202465	0.612821	0.259287	0.000727809	0.403617	14.4033	0	0	1	0	0	0	1	0
672	2017	C30	0	0	0	0	2.19722	8.63941	22.513	0.518649	0.130133	0	0.34688	0.569827	0.481059	0.000577148	0.392387	14.2855	0	0	1	0	0	0	1	0
672	2018	C30	0.693147	1	0	0	1.79176	8.79422	22.6695	0.679674	0.228942	0	0.467035	0.569828	0.735802	0.000501936	0.316734	14.2855	0	0	1	0	0	0	1	0
672	2019	C30	0.693147	1	0	0	1.79176	9.05715	23.0157	0.521001	0.281403	0	0.487956	0.569828	1.08237	0.000435931	0.267874	14.3461	0	0	1	0	0	0	1	0
672	2020	C30	0.693147	1	0	0	1.79176	8.88702	23.1484	0.564829	0.193057	0	0.485961	0.555792	1.25334	0.000656184	0.257179	14.3461	0	0	1	0	0	0	1	0
672	2021	C30	0.693147	1	0	0	1.60944	9.05988	23.4396	0.674558	0.170552	0	0.435764	0.563575	1.17137	0.000652511	0.240144	14.4033	0	0	1	0	0	0	1	0
672	2022	C30	0.693147	1	0	0	1.79176	8.85254	23.5105	0.930297	0.0611731	0	0.336226	0.557015	0.915776	0.000820184	0.264376	14.4033	0	0	1	0	0	0	1	0
676	2012	C38	0	0	0	0	1.60944	7.14518	20.5189	0.522555	-0.176302	0	0.241531	0.306271	0.569725	0.00231302	0.231855	13.2357	0	1	0	1	0	1	0	0
676	2013	C38	0	0	0	0	0	7.10819	20.398	0.443891	0.018856	0	0.298387	0.311265	0.692619	0.001583	0.232206	13.2357	0	1	0	1	0	1	0	0
676	2015	C38	0	0	0	0	2.63906	6.95805	19.5603	0.036579	-0.0089655	0	0.34551	0.300642	1.04448	0.00274099	0.31091	13.4444	0	1	0	1	0	1	0	0
676	2018	I	0	0	1.09861	1	4.04305	10.8399	22.7888	0.879271	0.0957184	4.1644	0.187438	0.509277	2.16807	0.000510971	0.0012459	14.8802	0	1	0	1	0	0	0	1
676	2019	I	0	0	2.70805	1	4.09434	11.1763	22.9488	0.777603	0.0708062	4.6839	0.117345	0.469053	1.96351	0.000404903	0.0010291	14.8802	0	1	0	1	0	0	0	1
676	2020	I	0	0	2.07944	1	4.09434	11.248	22.5183	0.602401	-0.385362	3.9075	0.0400974	0.425938	1.92737	0.00030107	0.00117096	15.0245	0	1	0	0	1	0	0	1
676	2021	I	0	0	1.60944	1	4.40672	10.7353	22.3493	0.472423	0.0229745	0.1322	0.112708	0.385012	2.44354	0.000363839	0.00107435	14.8628	0	1	0	0	1	0	0	1
676	2022		0	0	2.83321	1	4.57471	10.0662	22.1801	0.574493	-0.0829698	0.0109	0.22271	0.31593	3.69285	0.000698634	0.000969914	14.7901	0	1	0	0	1	0	0	1
677	2012	C28	0	0	0	0	0	7.046	22.0158	0.638431	0.212453	0.0036	-0.142509	0.447844	0.207261	0.00290361	0.638817	13.3047	1	1	0	0	1	0	1	0
677	2013	C28	0	0	0	0	0	7.91038	21.9257	0.615516	-0.0865231	0	-0.00511512	0.423605	0.28238	0.000703236	0.573924	13.3047	1	1	0	0	1	0	1	0
677	2016	C28	0.693147	1	0	0	0	6.97923	20.5541	0.130086	0.0194575	0	0.153947	0.348018	1.5288	0.000737784	0.498498	13.3047	0	1	0	0	1	0	1	0
677	2017	C28	0.693147	1	0	0	0	7.12967	20.5546	0.232552	0.00915599	0	0.120942	0.353945	1.40544	0.000466815	0.461089	12.6761	0	1	0	0	1	0	1	0
677	2018	C28	0.693147	1	0	0	0	7.3137	20.5871	0.354504	0.00745715	0	0.118347	0.344432	1.17803	0.000379177	0.531965	12.6761	0	1	0	0	1	0	1	0
677	2019	C28	0.693147	1	0	0	0	7.44905	20.5768	0.255812	0.0207089	0	0.157646	0.344002	1.68104	0.000440752	0.492246	12.6115	0	1	0	0	1	0	1	0
677	2020	C28	1.09861	1	0	0	0	7.32391	20.5808	0.338782	0.0193169	0	0.149214	0.343451	2.12943	0.000470131	0.452859	12.6115	0	1	0	0	1	0	1	0
677	2021	C28	1.09861	1	0	0	0	7.80377	20.7858	0.348461	0.160533	0	0.295604	0.360083	2.65856	0.000388773	0.343827	12.8992	0	1	0	0	1	0	1	0
677	2022	C28	0.693147	1	0	0	0	7.71852	20.8782	0.41763	0.0924103	0	0.234942	0.341741	3.31539	0.000451183	0.31338	12.8992	0	1	0	0	1	0	1	0
678	2012	C34	0	0	0	0	0	7.48316	21.0002	0.66305	0.00471195	0.0012	0.140318	0.283538	0.50648	0.000906283	0.177334	13.3047	1	1	0	1	0	0	0	1
678	2013	C34	0	0	0	0	0.693147	7.41298	21.4905	0.813402	0.00238637	0.0009	0.120513	0.493568	0.72441	0.000788839	0.267476	13.4588	1	1	0	1	0	0	0	1
678	2014	C34	0	0	0	0	0	7.63797	21.5306	0.650109	0.00350256	0.0011	0.131659	0.506275	0.457567	0.000763662	0.353968	13.2177	1	1	0	1	0	0	0	1
678	2015	C34	0	0	0	0	0	7.51743	21.5778	0.439142	-0.0322617	0	0.0844693	0.508294	0.508623	0.000787315	0.394992	13.2177	1	1	0	1	0	0	0	1
678	2016	C34	0	0	0	0	0	7.59526	21.6704	0.36722	0.00674046	0	0.112373	0.503815	0.640908	0.000660895	0.399829	13.2177	1	1	0	1	0	0	0	1
678	2018	C34	0	0	0	0	0	7.61318	21.737	0.739423	-0.0201607	0	0.0900387	0.503815	0.50214	0.000558358	0.438273	13.2177	0	1	0	1	0	0	0	1
678	2019	C34	0	0	0	0	0	7.44924	21.7147	0.583648	0.00486288	0	0.106233	0.503815	0.43671	0.000597521	0.453106	13.2177	0	1	0	1	0	0	0	1
678	2020	C34	0	0	0	0	0	7.42111	21.6775	0.711208	-0.0353477	0	0.0771891	0.483595	0.502275	0.00066254	0.45556	13.2177	0	1	0	1	0	0	0	1
678	2021	C34	0	0	0	0	0	7.55071	21.621	0.700695	-0.0193394	0	0.12572	0.508603	0.460218	0.000646092	0.44175	13.2177	0	1	0	1	0	0	0	1
678	2022		0	0	0	0	0	7.43289	21.5985	0.595455	-0.0524434	0	0.0600407	0.496874	0.445437	0.000744869	0.414669	13.2177	0	1	0	1	0	0	0	1
679	2012	F	0	0	0	0	0	8.74924	22.9869	0.938405	0.0223072	0.0216	0.323083	0.38817	0.262666	0.000880103	0.0681561	13.1224	0	0	0	0	1	0	0	1
679	2013	F	0	0	0	0	0	8.84048	22.971	1.00313	0.0244199	0.0216	0.315337	0.388264	0.208266	0.000885372	0.0639177	13.1224	0	0	0	0	1	0	0	1
679	2014	F	0	0	0	0	0.693147	8.74054	22.9095	0.941301	0.0120678	0.0216	0.310862	0.376111	0.38827	0.000913882	0.0937142	13.1224	0	0	0	0	1	0	0	1
679	2015	F	0	0	0	0	1.94591	8.40505	22.8548	0.626002	-0.0258198	0.0216	0.229629	0.313173	0.258711	0.0010513	0.13703	13.5278	0	0	0	0	1	0	0	1
679	2016	F	0	0	0	0	0.693147	8.43263	22.6608	0.667936	0.00383906	0.0216	0.219707	0.303788	0.279577	0.00136797	0.0430419	13.5278	0	0	0	0	1	0	0	1
679	2017	F	0	0	0	0	1.09861	8.48679	22.5222	0.854167	0.000307743	0.0185	0.201432	0.319754	0.337161	0.000605118	0.0449655	13.5278	0	0	0	0	1	0	0	1
679	2018	F	0	0	0	0	0	7.98004	22.4438	0.942754	-0.074265	0.0185	0.130114	0.31821	0.442111	0.00095569	0.0456364	13.5278	0	0	0	0	1	0	0	1
679	2019	F	0	0	0	0	0	7.66124	22.2289	0.883011	-0.0684215	0.0185	0.153119	0.317003	0.0534905	0.0012726	0.0532051	13.5278	0	0	0	0	1	0	0	1
679	2020	F	0	0	0	0	0	6.20763	21.019	0.807091	0.00135392	0	0.243053	0.32069	0.54631	0.00266619	0.166856	13.3692	0	0	0	0	1	0	0	1
679	2021	F	0	0	0	0	0	6.23402	20.762	0.472758	-0.248053	0	0.255096	0.32919	0.405295	0.0028042	0.201762	13.3692	0	0	0	0	1	0	0	1
679	2022	F	0	0	0	0	0	6.09674	20.6918	0.302112	-0.0595452	0	0.220776	0.329316	0.321816	0.00258359	0.202115	13.3692	0	0	0	0	1	0	0	1
680	2012	C35	0	0	0	0	0	9.27383	23.3115	0.961593	0.00169957	0.0153	0.139423	0.222518	0.967232	0.000670258	0.192664	14.3461	1	1	0	0	1	1	0	0
680	2013	C35	0	0	0	0	0	9.2751	23.2554	1.05261	-0.030107	0.0139	0.11849	0.291405	0.950333	0.000756025	0.185387	14.3461	1	1	0	0	1	1	0	0
[truncated: 25,777 more rows]
